# Supplementary material for: Shared genetic etiology between Parkinson’s disease and blood levels of specific lipids
Source: PubMed Central journal article supplement (PMC7935855; doi:10.1038/s41531-021-00168-9), 2021-03-05
Supplement: 41531_2021_168_MOESM1_ESM.pdf [file 41531_2021_168_MOESM1_ESM.pdf]

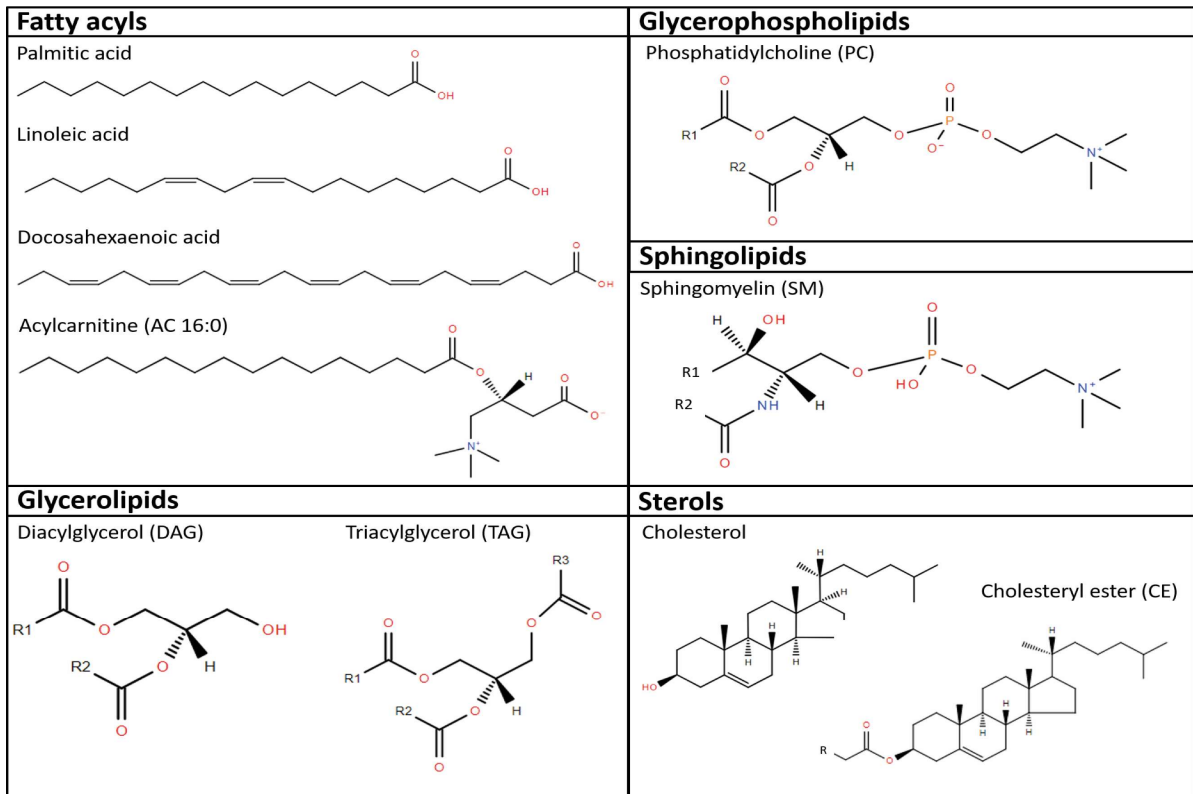

**Supplementary figure 1. Chemical structure of relevant lipid classes.** Schematic representation of the chemical structures of fatty acids (including palmitic acid, linoleic acid and docosahexaenoic acid), glycerolipids (including diacylglycerol and triacylglycerol), glycerophospholipids (including phosphatidylcholine, lysophosphatidylcholine and lysophosphatidylethanolamine), sterols (including cholesterol and cholesteryl ester) and sphingolipids (including sphingomyelin). Side chains indicated with an R correspond to a fatty acid. Chemical structures are adapted from the LIPID MAPS structure database[1].

**Supplementary Data 1. Detailed results of the PRS-based analyses in phase I.** Results are classified by lipid species (fatty acyls, glycerolipids, glycerophospholipids, sphingolipids, sterols, lipoproteins and others). For each lipid species, the SNP P-value threshold ( $P_T$ ; thresh), the P-value (Pval), the variance explained ( $R^2$ ), and the number of SNPs (nsnps) are listed; P-values lower than  $1.93E-05$  (significant after Bonferroni correction) are highlighted in green; R higher than 1% is highlighted in blue.

**Fatty acids (FA) - Kettunen et al., 2016 & Shin et al., 2014**

| LA (Linoleic acid)              |             |             |        | DHA (docosahexaenoic acid) |             |             |        | Bis.DB.ratio                             |             |             |        | Bis.FA.ratio                       |             |             |        |
|---------------------------------|-------------|-------------|--------|----------------------------|-------------|-------------|--------|------------------------------------------|-------------|-------------|--------|------------------------------------|-------------|-------------|--------|
| thresh                          | pval        | r2          | nsnps  | thresh                     | pval        | r2          | nsnps  | thresh                                   | pval        | r2          | nsnps  | thresh                             | pval        | r2          | nsnps  |
| 0.001                           | 0.138954603 | 8.70285E-05 | 1410   | 0.001                      | 0.40781981  | 4.02711E-06 | 1410   | 0.001                                    | 0.01376715  | 0.000359074 | 1410   | 0.001                              | 0.062889046 | 0.00017794  | 1407   |
| 0.05                            | 0.082314635 | 0.000142755 | 34881  | 0.05                       | 0.228079616 | 4.11357E-05 | 34881  | 0.05                                     | 0.379200579 | 6.9954E-06  | 34876  | 0.05                               | 0.496942091 | 4.4585E-09  | 34798  |
| 0.1                             | 0.120714396 | 0.000101439 | 62719  | 0.1                        | 0.22103042  | 4.37747E-05 | 62718  | 0.1                                      | 0.376233767 | 7.35499E-06 | 62703  | 0.1                                | 0.274219265 | 2.73417E-05 | 62572  |
| 0.2                             | 0.098572621 | 0.000122961 | 111437 | 0.2                        | 0.178855331 | 6.2663E-05  | 111436 | 0.2                                      | 0.201671398 | 5.16356E-05 | 111414 | 0.2                                | 0.139368347 | 8.90735E-05 | 111170 |
| 0.3                             | 0.238514494 | 3.73799E-05 | 154457 | 0.3                        | 0.346790944 | 1.14997E-05 | 154455 | 0.3                                      | 0.149156935 | 7.99818E-05 | 154425 | 0.3                                | 0.135451536 | 9.20289E-05 | 154087 |
| 0.4                             | 0.237022091 | 3.78889E-05 | 192532 | 0.4                        | 0.297043581 | 2.10389E-05 | 192531 | 0.4                                      | 0.115755721 | 0.000105847 | 192495 | 0.4                                | 0.122055012 | 0.000103001 | 192065 |
| 0.5                             | 0.269071974 | 2.8017E-05  | 226772 | 0.5                        | 0.340176617 | 1.25733E-05 | 226767 | 0.5                                      | 0.147869663 | 8.08388E-05 | 226729 | 0.5                                | 0.146351733 | 8.40557E-05 | 226213 |
| DB.in.FA                        |             |             |        | CH2.in.FA                  |             |             |        | CH2.DB.ratio                             |             |             |        | Tot.FA                             |             |             |        |
| thresh                          | pval        | r2          | nsnps  | thresh                     | pval        | r2          | nsnps  | thresh                                   | pval        | r2          | nsnps  | thresh                             | pval        | r2          | nsnps  |
| 0.001                           | 0.254491384 | 2.77309E-05 | 1411   | 0.001                      | 0.426354534 | 2.54735E-06 | 1411   | 0.001                                    | 0.166797576 | 4.91493E-05 | 1410   | 0.001                              | 0.244045755 | 3.55959E-05 | 1410   |
| 0.05                            | 0.407478456 | 3.4825E-06  | 35002  | 0.05                       | 0.06939799  | 0.000161918 | 35038  | 0.05                                     | 0.299766374 | 1.44945E-05 | 34876  | 0.05                               | 0.123383631 | 9.93296E-05 | 34877  |
| 0.1                             | 0.178249296 | 5.40544E-05 | 62933  | 0.1                        | 0.042383276 | 0.000219534 | 62995  | 0.1                                      | 0.129374602 | 6.70519E-05 | 62713  | 0.1                                | 0.249695851 | 3.37816E-05 | 62710  |
| 0.2                             | 0.145361068 | 7.09712E-05 | 111837 | 0.2                        | 0.000103937 | 0.001016224 | 111967 | 0.2                                      | 0.024761038 | 0.000202785 | 111427 | 0.2                                | 0.233363292 | 3.92229E-05 | 111418 |
| 0.3                             | 0.143781201 | 7.19073E-05 | 155070 | 0.3                        | 0.000160495 | 0.000956072 | 155265 | 0.3                                      | 0.023114915 | 0.000208863 | 154449 | 0.3                                | 0.381108744 | 6.77885E-06 | 154435 |
| 0.4                             | 0.105959617 | 9.9071E-05  | 193298 | 0.4                        | 5.28692E-05 | 0.001110186 | 193561 | 0.4                                      | 0.014750107 | 0.000249072 | 192514 | 0.4                                | 0.403242405 | 4.44331E-06 | 192496 |
| 0.5                             | 0.114860514 | 9.17168E-05 | 227676 | 0.5                        | 0.000119775 | 0.000996566 | 227987 | 0.5                                      | 0.020022691 | 0.000221623 | 226750 | 0.5                                | 0.47712782  | 2.43656E-07 | 226735 |
| FALen (fatty acid length)       |             |             |        | FAw3                       |             |             |        | FAw6                                     |             |             |        | FAw795                             |             |             |        |
| thresh                          | pval        | r2          | nsnps  | thresh                     | pval        | r2          | nsnps  | thresh                                   | pval        | r2          | nsnps  | thresh                             | pval        | r2          | nsnps  |
| 0.001                           | 0.013625756 | 0.000361674 | 1410   | 0.001                      | 0.408557591 | 3.94859E-06 | 1408   | 0.001                                    | 0.194552642 | 5.49175E-05 | 1409   | 0.001                              | 0.150422885 | 7.92536E-05 | 1410   |
| 0.05                            | 0.046017396 | 0.000210605 | 34876  | 0.05                       | 0.038449087 | 0.000231018 | 34866  | 0.05                                     | 0.043818624 | 0.000215973 | 34868  | 0.05                               | 0.187337412 | 5.83502E-05 | 34877  |
| 0.1                             | 0.148829607 | 8.04844E-05 | 62707  | 0.1                        | 0.094559011 | 0.000127316 | 62698  | 0.1                                      | 0.073058223 | 0.000156387 | 62696  | 0.1                                | 0.340406514 | 1.25286E-05 | 62712  |
| 0.2                             | 0.027969114 | 0.000271104 | 111412 | 0.2                        | 0.054114477 | 0.000190464 | 111413 | 0.2                                      | 0.015675727 | 0.00043019  | 111386 | 0.2                                | 0.421264345 | 2.92209E-06 | 111419 |
| 0.3                             | 0.020078752 | 0.000312449 | 154425 | 0.3                        | 0.090383022 | 0.00013225  | 154428 | 0.3                                      | 0.053806058 | 0.00019167  | 154399 | 0.3                                | 0.452332715 | 1.06211E-06 | 154437 |
| 0.4                             | 0.016161743 | 0.000339899 | 192491 | 0.4                        | 0.107477577 | 0.00011353  | 192486 | 0.4                                      | 0.048826942 | 0.000203107 | 192455 | 0.4                                | 0.410503064 | 3.79013E-06 | 192500 |
| 0.5                             | 0.013110299 | 0.000366615 | 226728 | 0.5                        | 0.158886955 | 7.36895E-05 | 226716 | 0.5                                      | 0.066928359 | 0.000166371 | 226690 | 0.5                                | 0.351276108 | 1.07974E-05 | 226738 |
| MUFA                            |             |             |        | otPUFA                     |             |             |        | dihomo-linolenate (20:3n3 or n6)         |             |             |        | docosapentaenoate (n3 DPA; 22:5n3) |             |             |        |
| thresh                          | pval        | r2          | nsnps  | thresh                     | pval        | r2          | nsnps  | thresh                                   | pval        | r2          | nsnps  | thresh                             | pval        | r2          | nsnps  |
| 0.001                           | 0.053311152 | 0.000192341 | 1410   | 0.001                      | 0.161648638 | 7.19998E-05 | 1410   | 0.001                                    | 0.039970812 | 0.000416614 | 868    | 0.001                              | 0.098888463 | 0.000224946 | 868    |
| 0.05                            | 0.306776131 | 1.88424E-05 | 34882  | 0.05                       | 0.1346126   | 9.00904E-05 | 34875  | 0.05                                     | 0.000187501 | 0.00171812  | 20370  | 0.05                               | 0.003832942 | 0.000963853 | 20370  |
| 0.1                             | 0.410135747 | 3.81366E-06 | 62720  | 0.1                        | 0.128854848 | 9.45426E-05 | 62710  | 0.1                                      | 7.55E-06    | 0.00254175  | 36492  | 0.1                                | 0.000261309 | 0.001630729 | 36492  |
| 0.2                             | 0.326426667 | 1.49479E-05 | 111441 | 0.2                        | 0.050379646 | 0.000198776 | 111424 | 0.2                                      | 4.12E-07    | 0.003297056 | 64866  | 0.2                                | 0.00024536  | 0.001646629 | 64867  |
| 0.3                             | 0.211370955 | 4.74817E-05 | 154463 | 0.3                        | 0.089615519 | 0.000133137 | 154440 | 0.3                                      | 1.64E-06    | 0.002938062 | 89586  | 0.3                                | 0.000294251 | 0.001600779 | 89562  |
| 0.4                             | 0.167772198 | 6.85149E-05 | 192531 | 0.4                        | 0.084658785 | 0.000139408 | 192509 | 0.4                                      | 5.32E-06    | 0.002632261 | 111586 | 0.4                                | 0.002421787 | 0.001075908 | 111586 |
| 0.5                             | 0.151944409 | 7.80945E-05 | 226771 | 0.5                        | 0.14000807  | 8.61342E-05 | 226742 | 0.5                                      | 2.68E-06    | 0.002809512 | 131214 | 0.5                                | 0.002956229 | 0.001027112 | 131212 |
| eicosapentaenoate (EPA; 20:5n3) |             |             |        | linoleate (18:2n6)         |             |             |        | linolenate [alpha or gamma; 18:3n3 or 6] |             |             |        | Docosapentaenoic acid (n6-DPA)     |             |             |        |
| thresh                          | pval        | r2          | nsnps  | thresh                     | pval        | r2          | nsnps  | thresh                                   | pval        | r2          | nsnps  | thresh                             | pval        | r2          | nsnps  |
| 0.001                           | 0.260078568 | 5.61E-05    | 868    | 0.001                      | 0.188546854 | 0.000106384 | 868    | 0.001                                    | 0.152204433 | 0.000143732 | 868    | 0.001                              | 0.059328585 | 0.000956303 | 869    |
| 0.05                            | 1.46E-05    | 0.002367868 | 20371  | 0.05                       | 0.030410578 | 0.000479205 | 20370  | 0.05                                     | 0.002102169 | 0.001115946 | 20370  | 0.05                               | 0.000681189 | 0.004021769 | 20371  |
| 0.1                             | 1.55E-06    | 0.002949213 | 36493  | 0.1                        | 0.002454182 | 0.001078498 | 36492  | 0.1                                      | 7.82E-05    | 0.00194593  | 36492  | 0.1                                | 0.008898413 | 0.002204262 | 36493  |
| 0.2                             | 1.47E-07    | 0.003562566 | 64867  | 0.2                        | 0.004875955 | 0.00091049  | 64867  | 0.2                                      | 0.001020455 | 0.001295477 | 64867  | 0.2                                | 0.006561804 | 0.002414515 | 64864  |
| 0.3                             | 2.19E-09    | 0.004664429 | 89564  | 0.3                        | 0.00656724  | 0.000838446 | 89561  | 0.3                                      | 0.003666626 | 0.001552761 | 89562  | 0.3                                | 0.009770529 | 0.002140118 | 89584  |
| 0.4                             | 2.79E-08    | 0.003996741 | 111587 | 0.4                        | 0.009627793 | 0.000746776 | 111584 | 0.4                                      | 0.00069594  | 0.001391308 | 111586 | 0.4                                | 0.033205651 | 0.001323118 | 111583 |
| 0.5                             | 1.10E-07    | 0.003638742 | 131216 | 0.5                        | 0.00891362  | 0.000765157 | 131215 | 0.5                                      | 0.00118242  | 0.001258723 | 131212 | 0.5                                | 0.054201771 | 0.001012196 | 131210 |
| Stearamide                      |             |             |        | Isovalerate                |             |             |        | Butyrylcarnitine                         |             |             |        | 15-methylpalmitate                 |             |             |        |
| thresh                          | pval        | r2          | nsnps  | thresh                     | pval        | r2          | nsnps  | thresh                                   | pval        | r2          | nsnps  | thresh                             | pval        | r2          | nsnps  |
| 0.001                           | 0.009641205 | 0.002210859 | 868    | 0.001                      | 0.246226128 | 7.00E-05    | 869    | 0.001                                    | 0.138562358 | 0.000160708 | 868    | 0.001                              | 0.407820931 | 7.83E-06    | 868    |
| 0.05                            | 0.081535498 | 0.000786075 | 20371  | 0.05                       | 0.182534879 | 0.000121801 | 20369  | 0.05                                     | 0.034001788 | 0.000453097 | 20370  | 0.05                               | 0.122011576 | 0.000195487 | 20371  |
| 0.1                             | 0.004449593 | 0.002762123 | 36492  | 0.1                        | 0.422086677 | 5.74E-06    | 36493  | 0.1                                      | 0.0552626   | 0.000346476 | 36492  | 0.1                                | 0.059611541 | 0.000349622 | 36493  |
| 0.2                             | 0.002554033 | 0.003164254 | 64866  | 0.2                        | 0.34180136  | 2.47E-05    | 64868  | 0.2                                      | 0.061856359 | 0.000322397 | 64868  | 0.2                                | 0.091347523 | 0.000255738 | 64867  |
| 0.3                             | 0.000832139 | 0.003988489 | 89561  | 0.3                        | 0.442504578 | 3.11E-06    | 89559  | 0.3                                      | 0.096475635 | 0.000230609 | 89565  | 0.3                                | 0.127306277 | 0.000186934 | 89563  |

|     |             |             |        |     |             |          |        |     |             |             |        |     |             |             |        |
|-----|-------------|-------------|--------|-----|-------------|----------|--------|-----|-------------|-------------|--------|-----|-------------|-------------|--------|
| 0.4 | 0.004369369 | 0.002775227 | 111585 | 0.4 | 0.46927751  | 8.82E-07 | 111587 | 0.4 | 0.129453832 | 0.000173422 | 111587 | 0.4 | 0.143286621 | 0.000163578 | 111588 |
| 0.5 | 0.002585694 | 0.003155281 | 131211 | 0.5 | 0.439424692 | 3.45E-06 | 131205 | 0.5 | 0.240998591 | 6.73E-05    | 131213 | 0.5 | 0.118997345 | 0.000200561 | 131216 |

| 2-hydroxyglutarate |             |             |        | 3-carboxy-4-methyl-5-propyl-2-furanpropanoate (CMPF) |             |             |        | dodecanedioate |             |          |        | hexadecanedioate |             |          |        |
|--------------------|-------------|-------------|--------|------------------------------------------------------|-------------|-------------|--------|----------------|-------------|----------|--------|------------------|-------------|----------|--------|
| thresh             | pval        | r2          | nsnps  | thresh                                               | pval        | r2          | nsnps  | thresh         | pval        | r2       | nsnps  | thresh           | pval        | r2       | nsnps  |
| 0.001              | 0.317013577 | 3.82E-05    | 869    | 0.001                                                | 0.05608581  | 0.000342649 | 868    | 0.001          | 0.480021261 | 4.14E-07 | 870    | 0.001            | 0.318776121 | 3.44E-05 | 869    |
| 0.05               | 0.029519052 | 0.000600663 | 20364  | 0.05                                                 | 0.311072896 | 3.30E-05    | 20370  | 0.05           | 0.418740296 | 6.94E-06 | 20362  | 0.05             | 0.399887172 | 9.98E-06 | 20366  |
| 0.1                | 0.012713604 | 0.000841614 | 36484  | 0.1                                                  | 0.351521142 | 1.97E-05    | 36492  | 0.1            | 0.325451988 | 3.38E-05 | 36476  | 0.1              | 0.415993802 | 6.98E-06 | 36499  |
| 0.2                | 0.019129623 | 0.000723518 | 64852  | 0.2                                                  | 0.287405051 | 4.27E-05    | 64868  | 0.2            | 0.415264863 | 7.55E-06 | 64871  | 0.2              | 0.350665789 | 2.28E-05 | 64885  |
| 0.3                | 0.057268904 | 0.000419748 | 89548  | 0.3                                                  | 0.308008932 | 3.42E-05    | 89563  | 0.3            | 0.478006598 | 5.02E-07 | 89585  | 0.3              | 0.260671543 | 6.38E-05 | 89626  |
| 0.4                | 0.022667041 | 0.000675121 | 111560 | 0.4                                                  | 0.287399532 | 4.27E-05    | 111584 | 0.4            | 0.423089577 | 6.20E-06 | 111600 | 0.4              | 0.227233755 | 8.68E-05 | 111632 |
| 0.5                | 0.01309687  | 0.000832961 | 131186 | 0.5                                                  | 0.329251588 | 2.65E-05    | 131214 | 0.5            | 0.475966794 | 5.99E-07 | 131220 | 0.5              | 0.235303351 | 8.07E-05 | 131266 |

| octadecanedioate |             |             |        | tetradecanedioate |             |             |        | n-Butyl Oleate |             |             |        | 2-Hydroxypalmitate |             |             |        |
|------------------|-------------|-------------|--------|-------------------|-------------|-------------|--------|----------------|-------------|-------------|--------|--------------------|-------------|-------------|--------|
| thresh           | pval        | r2          | nsnps  | thresh            | pval        | r2          | nsnps  | thresh         | pval        | r2          | nsnps  | thresh             | pval        | r2          | nsnps  |
| 0.001            | 0.037673999 | 0.000459826 | 869    | 0.001             | 0.388604498 | 1.42E-05    | 870    | 0.001          | 0.053336165 | 0.000602747 | 870    | 0.001              | 0.155603855 | 0.000139558 | 868    |
| 0.05             | 0.336786824 | 2.58E-05    | 20371  | 0.05              | 0.259481054 | 7.39E-05    | 20362  | 0.05           | 0.000379051 | 0.002623633 | 20362  | 0.05               | 0.001647462 | 0.001174664 | 20370  |
| 0.1              | 0.248107423 | 6.73E-05    | 36493  | 0.1               | 0.227144532 | 9.95E-05    | 36496  | 0.1            | 0.003094494 | 0.001734523 | 36486  | 0.1                | 5.53E-05    | 0.002032257 | 36492  |
| 0.2              | 0.327513084 | 2.90E-05    | 64863  | 0.2               | 0.101651183 | 0.000287486 | 64872  | 0.2            | 0.000737195 | 0.002339245 | 64854  | 0.2                | 3.89E-05    | 0.002122308 | 64867  |
| 0.3              | 0.306803378 | 3.71E-05    | 89590  | 0.3               | 0.098924968 | 0.000294534 | 89564  | 0.3            | 0.000828124 | 0.002289422 | 89540  | 0.3                | 0.000197605 | 0.001707129 | 89563  |
| 0.4              | 0.224180365 | 8.36E-05    | 111594 | 0.4               | 0.09674912  | 0.000300324 | 111573 | 0.4            | 0.000467485 | 0.002533757 | 111560 | 0.4                | 0.000119953 | 0.001834118 | 111584 |
| 0.5              | 0.254426656 | 6.35E-05    | 131212 | 0.5               | 0.050976086 | 0.000475058 | 131207 | 0.5            | 0.000387241 | 0.002614462 | 131185 | 0.5                | 0.000172805 | 0.001741196 | 131211 |

| 2-hydroxystearate |             |             |        | valerate |             |             |        | 10-undecenoate (11:1n1) |             |             |        | 5-dodecenoate (12:1n7) |             |             |        |
|-------------------|-------------|-------------|--------|----------|-------------|-------------|--------|-------------------------|-------------|-------------|--------|------------------------|-------------|-------------|--------|
| thresh            | pval        | r2          | nsnps  | thresh   | pval        | r2          | nsnps  | thresh                  | pval        | r2          | nsnps  | thresh                 | pval        | r2          | nsnps  |
| 0.001             | 0.469763927 | 7.87E-07    | 868    | 0.001    | 0.128133439 | 0.000321829 | 868    | 0.001                   | 0.081083863 | 0.000265512 | 868    | 0.001                  | 0.159300835 | 0.000135839 | 869    |
| 0.05              | 0.005432947 | 0.000886431 | 20370  | 0.05     | 0.207971752 | 0.000165258 | 20367  | 0.05                    | 0.011415979 | 0.000703917 | 20370  | 0.05                   | 0.028568198 | 0.000494089 | 20370  |
| 0.1               | 0.000944711 | 0.00131888  | 36492  | 0.1      | 0.390590733 | 1.93E-05    | 36486  | 0.1                     | 0.004700652 | 0.000916263 | 36492  | 0.1                    | 0.011362653 | 0.000708487 | 36490  |
| 0.2               | 0.000122112 | 0.001837816 | 64867  | 0.2      | 0.347773926 | 3.82E-05    | 64856  | 0.2                     | 0.001492781 | 0.001197471 | 64867  | 0.2                    | 0.024406955 | 0.000530007 | 64868  |
| 0.3               | 0.001318509 | 0.001235464 | 89589  | 0.3      | 0.317691688 | 5.62E-05    | 89542  | 0.3                     | 0.000607897 | 0.001421412 | 89564  | 0.3                    | 0.01707333  | 0.00061267  | 89565  |
| 0.4               | 0.002719704 | 0.001055797 | 111589 | 0.4      | 0.324607418 | 5.17E-05    | 111567 | 0.4                     | 0.000587938 | 0.001429783 | 111588 | 0.4                    | 0.05362138  | 0.000354265 | 111587 |
| 0.5               | 0.004231949 | 0.000947274 | 131217 | 0.5      | 0.314892292 | 5.80E-05    | 131191 | 0.5                     | 0.000455794 | 0.001493725 | 131215 | 0.5                    | 0.029952365 | 0.00048336  | 131213 |

| caproate (6:0) |             |             |        | caprylate (8:0) |             |             |        | heptanoate (7:0) |             |             |        | laurate (12:0) |             |             |        |
|----------------|-------------|-------------|--------|-----------------|-------------|-------------|--------|------------------|-------------|-------------|--------|----------------|-------------|-------------|--------|
| thresh         | pval        | r2          | nsnps  | thresh          | pval        | r2          | nsnps  | thresh           | pval        | r2          | nsnps  | thresh         | pval        | r2          | nsnps  |
| 0.001          | 0.4525867   | 1.93E-06    | 868    | 0.001           | 0.417677485 | 5.87E-06    | 868    | 0.001            | 0.31565768  | 3.13E-05    | 868    | 0.001          | 0.154710945 | 0.00014063  | 868    |
| 0.05           | 0.395415273 | 9.55E-06    | 20371  | 0.05            | 0.304808944 | 3.54E-05    | 20371  | 0.05             | 0.314308205 | 3.18E-05    | 20370  | 0.05           | 0.017442243 | 0.0006057   | 20371  |
| 0.1            | 0.179413935 | 0.000114348 | 36493  | 0.1             | 0.227133309 | 7.61E-05    | 36493  | 0.1              | 0.445700846 | 2.53E-06    | 36492  | 0.1            | 0.008189147 | 0.000784038 | 36492  |
| 0.2            | 0.133554263 | 0.000167246 | 64868  | 0.2             | 0.081283169 | 0.000265116 | 64868  | 0.2              | 0.191718031 | 0.000103279 | 64867  | 0.2            | 0.015918514 | 0.000626982 | 64866  |
| 0.3            | 0.260452062 | 5.60E-05    | 89588  | 0.3             | 0.086778975 | 0.000251762 | 89564  | 0.3              | 0.134342548 | 0.000166328 | 89587  | 0.3            | 0.019042343 | 0.000585349 | 89562  |
| 0.4            | 0.435491177 | 3.58E-06    | 111587 | 0.4             | 0.105768841 | 0.000212197 | 111587 | 0.4              | 0.181702968 | 0.00011231  | 111586 | 0.4            | 0.036186904 | 0.000439373 | 111585 |
| 0.5            | 0.420922361 | 5.41E-06    | 131214 | 0.5             | 0.097441308 | 0.000228433 | 131214 | 0.5              | 0.152886879 | 0.000142593 | 131213 | 0.5            | 0.027801677 | 0.000504591 | 131213 |

| pelargonate (9:0) |             |             |        | undecanoate (11:0) |             |             |        | 10-heptadecenoate (17:1n7) |             |             |        | 10-nonadecenoate (19:1n9) |             |             |        |
|-------------------|-------------|-------------|--------|--------------------|-------------|-------------|--------|----------------------------|-------------|-------------|--------|---------------------------|-------------|-------------|--------|
| thresh            | pval        | r2          | nsnps  | thresh             | pval        | r2          | nsnps  | thresh                     | pval        | r2          | nsnps  | thresh                    | pval        | r2          | nsnps  |
| 0.001             | 0.499884266 | 1.14E-11    | 868    | 0.001              | 0.072955154 | 0.000298571 | 868    | 0.001                      | 0.139459089 | 0.000159513 | 868    | 0.001                     | 0.039423282 | 0.000420404 | 868    |
| 0.05              | 0.353729384 | 1.91E-05    | 20370  | 0.05               | 0.214305392 | 8.85E-05    | 20368  | 0.05                       | 0.058705505 | 0.00033353  | 20370  | 0.05                      | 0.005634432 | 0.000874011 | 20371  |
| 0.1               | 0.463219219 | 1.16E-06    | 36492  | 0.1                | 0.42386826  | 5.21E-06    | 36489  | 0.1                        | 0.013151413 | 0.000671431 | 36492  | 0.1                       | 0.002670138 | 0.001056004 | 36493  |
| 0.2               | 0.184572627 | 0.000109638 | 64866  | 0.2                | 0.162268166 | 0.000137058 | 64861  | 0.2                        | 0.031043046 | 0.000473526 | 64867  | 0.2                       | 0.01126101  | 0.000708394 | 64868  |
| 0.3               | 0.138104688 | 0.000161168 | 89563  | 0.3                | 0.049372909 | 0.000384855 | 89578  | 0.3                        | 0.027379005 | 0.000501907 | 89559  | 0.3                       | 0.010454226 | 0.000726    | 89563  |
| 0.4               | 0.134873535 | 0.00016557  | 111585 | 0.4                | 0.030582546 | 0.000494936 | 111578 | 0.4                        | 0.044712252 | 0.000392453 | 111583 | 0.4                       | 0.018894408 | 0.000587234 | 111586 |
| 0.5               | 0.12247785  | 0.000183758 | 131211 | 0.5                | 0.027695335 | 0.000518194 | 131204 | 0.5                        | 0.040355675 | 0.000415007 | 131211 | 0.5                       | 0.016300311 | 0.00062154  | 131214 |

| adrenate (22:4n6) |             |             |        | arachidonate (20:4n6) |             |             |        | dihomo-linoleate (20:2n6) |             |             |        | eicosenoate (20:1n9 or 11) |             |             |        |
|-------------------|-------------|-------------|--------|-----------------------|-------------|-------------|--------|---------------------------|-------------|-------------|--------|----------------------------|-------------|-------------|--------|
| thresh            | pval        | r2          | nsnps  | thresh                | pval        | r2          | nsnps  | thresh                    | pval        | r2          | nsnps  | thresh                     | pval        | r2          | nsnps  |
| 0.001             | 0.054827251 | 0.000349079 | 868    | 0.001                 | 0.144262266 | 0.000152899 | 868    | 0.001                     | 0.036055682 | 0.000439764 | 868    | 0.001                      | 0.160312471 | 0.000134158 | 868    |
| 0.05              | 0.372717479 | 1.44E-05    | 20371  | 0.05                  | 0.0011593   | 0.001258674 | 20370  | 0.05                      | 0.063155702 | 0.000317815 | 20370  | 0.05                       | 0.138831222 | 0.000160283 | 20370  |
| 0.1               | 0.178684396 | 0.000115562 | 36493  | 0.1                   | 0.000415292 | 0.00151529  | 36492  | 0.1                       | 0.019665498 | 0.000577354 | 36492  | 0.1                        | 0.036092459 | 0.000439597 | 36492  |
| 0.2               | 0.092984765 | 0.000238616 | 64868  | 0.2                   | 4.96E-06    | 0.002647021 | 64867  | 0.2                       | 0.041420829 | 0.000409035 | 64867  | 0.2                        | 0.075141831 | 0.000281431 | 64867  |
| 0.3               | 0.241887585 | 6.69E-05    | 89587  | 0.3                   | 4.51E-06    | 0.002671848 | 89585  | 0.3                       | 0.064884084 | 0.000312106 | 89585  | 0.3                        | 0.045460967 | 0.000388659 | 89562  |
| 0.4               | 0.293721088 | 4.02E-05    | 111587 | 0.4                   | 3.07E-05    | 0.002177366 | 111584 | 0.4                       | 0.129939734 | 0.000172622 | 111586 | 0.4                        | 0.071617781 | 0.000291422 | 111586 |
| 0.5               | 0.277341298 | 4.76E-05    | 131214 | 0.5                   | 5.83E-05    | 0.002013271 | 131212 | 0.5                       | 0.140043484 | 0.000158653 | 131213 | 0.5                        | 0.094351529 | 0.000234972 | 131212 |

| margarate (17:0) |             |             |        |  | myristate (14:0) |             |             |        |  | myristoleate (14:1n5) |             |             |        |  | nonadecanoate (19:0) |             |             |        |  |
|------------------|-------------|-------------|--------|--|------------------|-------------|-------------|--------|--|-----------------------|-------------|-------------|--------|--|----------------------|-------------|-------------|--------|--|
| thresh           | pval        | r2          | nsnps  |  | thresh           | pval        | r2          | nsnps  |  | thresh                | pval        | r2          | nsnps  |  | thresh               | pval        | r2          | nsnps  |  |
| 0.001            | 0.132435534 | 0.00016914  | 868    |  | 0.001            | 0.240062505 | 6.77E-05    | 868    |  | 0.001                 | 0.064302825 | 0.000313922 | 868    |  | 0.001                | 0.450337514 | 2.12E-06    | 868    |  |
| 0.05             | 0.000229543 | 0.00166889  | 20370  |  | 0.05             | 0.015041246 | 0.00063883  | 20370  |  | 0.05                  | 0.018196932 | 0.000595139 | 20370  |  | 0.05                 | 0.02775065  | 0.000499802 | 20370  |  |
| 0.1              | 3.47E-05    | 0.00215148  | 36492  |  | 0.1              | 0.003942296 | 0.000958451 | 36492  |  | 0.1                   | 0.001052638 | 0.001284749 | 36492  |  | 0.1                  | 0.025120863 | 0.000522477 | 36490  |  |
| 0.2              | 0.001074958 | 0.001280568 | 64867  |  | 0.2              | 0.01344277  | 0.000665107 | 64867  |  | 0.2                   | 0.00105128  | 0.001285071 | 64867  |  | 0.2                  | 0.066509664 | 0.000307643 | 64864  |  |
| 0.3              | 0.000361475 | 0.00155401  | 89562  |  | 0.3              | 0.012875392 | 0.000675224 | 89562  |  | 0.3                   | 0.000228092 | 0.001669136 | 89564  |  | 0.3                  | 0.095656154 | 0.000232759 | 89558  |  |
| 0.4              | 0.00075272  | 0.001369581 | 111586 |  | 0.4              | 0.016017911 | 0.000624171 | 111586 |  | 0.4                   | 0.000557597 | 0.001443676 | 111587 |  | 0.4                  | 0.12576511  | 0.000179232 | 111582 |  |
| 0.5              | 0.000423618 | 0.001513996 | 131212 |  | 0.5              | 0.013369976 | 0.00066638  | 131212 |  | 0.5                   | 0.000400465 | 0.00152692  | 131213 |  | 0.5                  | 0.132636652 | 0.000169178 | 131210 |  |

  

| oleate (18:1n9) |             |             |        |  | palmitate (16:0) |             |             |        |  | palmitoleate (16:1n7) |             |             |        |  | pentadecanoate (15:0) |             |             |        |  |
|-----------------|-------------|-------------|--------|--|------------------|-------------|-------------|--------|--|-----------------------|-------------|-------------|--------|--|-----------------------|-------------|-------------|--------|--|
| thresh          | pval        | r2          | nsnps  |  | thresh           | pval        | r2          | nsnps  |  | thresh                | pval        | r2          | nsnps  |  | thresh                | pval        | r2          | nsnps  |  |
| 0.001           | 0.091553068 | 0.00024198  | 868    |  | 0.001            | 0.276087006 | 4.81E-05    | 868    |  | 0.001                 | 0.117705145 | 0.00019213  | 868    |  | 0.001                 | 0.368989997 | 1.58E-05    | 868    |  |
| 0.05            | 0.121687576 | 0.00185827  | 20369  |  | 0.05             | 0.076016879 | 0.000279032 | 20371  |  | 0.05                  | 0.195275224 | 0.000100613 | 20370  |  | 0.05                  | 0.011628815 | 0.000728767 | 20367  |  |
| 0.1             | 0.060459559 | 0.000328415 | 36491  |  | 0.1              | 0.0471841   | 0.000380536 | 36493  |  | 0.1                   | 0.083812537 | 0.000259835 | 36492  |  | 0.1                   | 0.001313173 | 0.001280564 | 36497  |  |
| 0.2             | 0.205175339 | 9.26E-05    | 64866  |  | 0.2              | 0.138582926 | 0.000160615 | 64868  |  | 0.2                   | 0.09301454  | 0.000238649 | 64867  |  | 0.2                   | 0.007655114 | 0.000832219 | 64871  |  |
| 0.3             | 0.141531752 | 0.000157344 | 89560  |  | 0.3              | 0.126181635 | 0.000178191 | 89563  |  | 0.3                   | 0.071928935 | 0.000291509 | 89559  |  | 0.3                   | 0.012221446 | 0.000716567 | 89566  |  |
| 0.4             | 0.214709662 | 8.53E-05    | 111582 |  | 0.4              | 0.185781782 | 0.000108594 | 111586 |  | 0.4                   | 0.096635825 | 0.000230968 | 111583 |  | 0.4                   | 0.01322866  | 0.000697177 | 111592 |  |
| 0.5             | 0.221069374 | 8.07E-05    | 131210 |  | 0.5              | 0.162165718 | 0.000132118 | 131214 |  | 0.5                   | 0.114982428 | 0.000196661 | 131211 |  | 0.5                   | 0.00891723  | 0.000794295 | 131220 |  |

  

| stearate (18:0) |             |             |        |  | stearidonate (18:4n3) |             |             |        |  | 5,8-tetradecadienoate |             |              |        |  | 12-hydroxyeicosatetraenoate (12-HETE) |             |             |        |  |
|-----------------|-------------|-------------|--------|--|-----------------------|-------------|-------------|--------|--|-----------------------|-------------|--------------|--------|--|---------------------------------------|-------------|-------------|--------|--|
| thresh          | pval        | r2          | nsnps  |  | thresh                | pval        | r2          | nsnps  |  | thresh                | pval        | r2           | nsnps  |  | thresh                                | pval        | r2          | nsnps  |  |
| 0.001           | 0.335879536 | 2.44E-05    | 868    |  | 0.001                 | 0.110235927 | 0.000204794 | 868    |  | 0.001                 | 0.162032227 | 0.000132589  | 868    |  | 0.001                                 | 0.051173206 | 0.000978821 | 868    |  |
| 0.05            | 0.016809292 | 0.000613544 | 20371  |  | 0.05                  | 8.56E-05    | 0.001924812 | 20370  |  | 0.05                  | 0.000990658 | 0.00130359   | 20368  |  | 0.05                                  | 0.206724368 | 0.000245424 | 20368  |  |
| 0.1             | 0.016026374 | 0.000624641 | 36493  |  | 0.1                   | 1.12E-06    | 0.003047176 | 36492  |  | 0.1                   | 6.24E-05    | 0.002004894  | 36490  |  | 0.1                                   | 0.299997298 | 0.000100914 | 36491  |  |
| 0.2             | 0.048408189 | 0.000374807 | 64868  |  | 0.2                   | 2.78E-06    | 0.002811704 | 64865  |  | 0.2                   | 0.000336688 | 0.0012517516 | 64865  |  | 0.2                                   | 0.270725195 | 0.000136819 | 64870  |  |
| 0.3             | 0.059465486 | 0.000330515 | 89562  |  | 0.3                   | 1.34E-07    | 0.003603613 | 89563  |  | 0.3                   | 0.000608888 | 0.00142565   | 89561  |  | 0.3                                   | 0.142264515 | 0.000420216 | 89590  |  |
| 0.4             | 0.138412204 | 0.000160778 | 111584 |  | 0.4                   | 6.73E-07    | 0.003181429 | 111585 |  | 0.4                   | 0.002791991 | 0.001046613  | 111584 |  | 0.4                                   | 0.290632831 | 0.000111624 | 111592 |  |
| 0.5             | 0.107342876 | 0.000209297 | 131212 |  | 0.5                   | 1.52E-06    | 0.002968563 | 131212 |  | 0.5                   | 0.00091232  | 0.001324195  | 131209 |  | 0.5                                   | 0.311436643 | 8.87E-05    | 131216 |  |

### Acylcarnitines (AC) - Draisma et al., 2015 & Shin et al., 2014

| AC 0   |             |             |        |  | AC 2:0 |             |             |        |  | AC 3:0 |             |             |        |  | AC 3:0 OH |             |             |        |  |
|--------|-------------|-------------|--------|--|--------|-------------|-------------|--------|--|--------|-------------|-------------|--------|--|-----------|-------------|-------------|--------|--|
| thresh | pval        | r2          | nsnps  |  | thresh | pval        | r2          | nsnps  |  | thresh | pval        | r2          | nsnps  |  | thresh    | pval        | r2          | nsnps  |  |
| 0.001  | 0.033316504 | 0.000449762 | 939    |  | 0.001  | 0.219359293 | 8.01829E-05 | 939    |  | 0.001  | 0.001802628 | 0.005321214 | 819    |  | 0.001     | 0.342646887 | 0.000103347 | 802    |  |
| 0.05   | 0.000174021 | 0.001709201 | 22496  |  | 0.05   | 0.002683403 | 0.001036036 | 22495  |  | 0.05   | 0.00285219  | 0.004800402 | 18895  |  | 0.05      | 0.07538762  | 0.001298332 | 18810  |  |
| 0.1    | 0.001053355 | 0.001263464 | 40453  |  | 0.1    | 8.35409E-05 | 0.001892993 | 40459  |  | 0.1    | 0.010788263 | 0.003319173 | 33882  |  | 0.1       | 0.024173718 | 0.002450026 | 33773  |  |
| 0.2    | 0.001843982 | 0.001126858 | 72151  |  | 0.2    | 6.72965E-06 | 0.002530128 | 72209  |  | 0.2    | 0.068519409 | 0.001391285 | 60105  |  | 0.2       | 0.044134107 | 0.001826949 | 60006  |  |
| 0.3    | 0.000248284 | 0.001620578 | 100010 |  | 0.3    | 2.32174E-05 | 0.002215832 | 100024 |  | 0.3    | 0.05982337  | 0.001523988 | 83131  |  | 0.3       | 0.014141373 | 0.003022954 | 82923  |  |
| 0.4    | 0.000241491 | 0.001627485 | 124958 |  | 0.4    | 2.45817E-05 | 0.002201385 | 125002 |  | 0.4    | 0.027788283 | 0.002305086 | 103642 |  | 0.4       | 0.007171533 | 0.003765968 | 103399 |  |
| 0.5    | 0.00063878  | 0.001386397 | 147254 |  | 0.5    | 9.99919E-05 | 0.001847881 | 147262 |  | 0.5    | 0.014591878 | 0.002990947 | 121933 |  | 0.5       | 0.005226441 | 0.00411739  | 121739 |  |

  

| AC 5:1 DC |             |             |        |  | AC 7:0 DC |             |             |        |  | AC 8:0 |             |             |        |  | AC 8:1 |             |             |        |  |
|-----------|-------------|-------------|--------|--|-----------|-------------|-------------|--------|--|--------|-------------|-------------|--------|--|--------|-------------|-------------|--------|--|
| thresh    | pval        | r2          | nsnps  |  | thresh    | pval        | r2          | nsnps  |  | thresh | pval        | r2          | nsnps  |  | thresh | pval        | r2          | nsnps  |  |
| 0.001     | 0.237089141 | 0.000239776 | 837    |  | 0.001     | 0.073327078 | 0.000365809 | 933    |  | 0.001  | 0.470254028 | 2.03874E-06 | 826    |  | 0.001  | 0.102665366 | 0.000214479 | 938    |  |
| 0.05      | 0.493446673 | 1.2634E-07  | 19354  |  | 0.05      | 0.000884228 | 0.001696297 | 22349  |  | 0.05   | 0.087337644 | 0.000674134 | 19284  |  | 0.05   | 0.000890518 | 0.00130465  | 22495  |  |
| 0.1       | 0.331029568 | 8.94304E-05 | 34808  |  | 0.1       | 0.000199371 | 0.002175138 | 40154  |  | 0.1    | 0.046951858 | 0.001026613 | 34617  |  | 0.1    | 0.000141663 | 0.001760622 | 40457  |  |
| 0.2       | 0.272764325 | 0.000171047 | 61838  |  | 0.2       | 6.41983E-05 | 0.002543682 | 71704  |  | 0.2    | 0.004387727 | 0.002510739 | 61609  |  | 0.2    | 1.13522E-05 | 0.002397205 | 72189  |  |
| 0.3       | 0.210631966 | 0.000302757 | 85614  |  | 0.3       | 0.000171901 | 0.002223172 | 99352  |  | 0.3    | 0.000786382 | 0.00365048  | 85258  |  | 0.3    | 0.000167476 | 0.001718777 | 100035 |  |
| 0.4       | 0.329902266 | 9.0708E-05  | 106872 |  | 0.4       | 4.043E-05   | 0.002694882 | 124180 |  | 0.4    | 0.00035082  | 0.004195018 | 106394 |  | 0.4    | 0.000211512 | 0.001660515 | 125027 |  |
| 0.5       | 0.402653989 | 2.84425E-05 | 125735 |  | 0.5       | 4.50925E-05 | 0.002659156 | 146327 |  | 0.5    | 0.000633385 | 0.003795973 | 125250 |  | 0.5    | 0.00024111  | 0.001627878 | 147292 |  |

  

| AC 9:0 |             |             |        |  | AC 10:0 |             |             |        |  | AC 10:1 |             |             |        |  | AC 10:2 |             |             |        |  |
|--------|-------------|-------------|--------|--|---------|-------------|-------------|--------|--|---------|-------------|-------------|--------|--|---------|-------------|-------------|--------|--|
| thresh | pval        | r2          | nsnps  |  | thresh  | pval        | r2          | nsnps  |  | thresh  | pval        | r2          | nsnps  |  | thresh  | pval        | r2          | nsnps  |  |
| 0.001  | 0.323965538 | 4.57066E-05 | 897    |  | 0.001   | 0.476199845 | 1.30381E-06 | 841    |  | 0.001   | 0.017897393 | 0.000765451 | 940    |  | 0.001   | 0.382973107 | 1.53923E-05 | 938    |  |
| 0.05   | 0.026212387 | 0.000824334 | 21243  |  | 0.05    | 0.089386797 | 0.000661248 | 19280  |  | 0.05    | 0.051634497 | 0.000461113 | 22347  |  | 0.05    | 0.158186091 | 0.000174361 | 22343  |  |
| 0.1    | 0.028644801 | 0.000791918 | 38165  |  | 0.1     | 0.062527731 | 0.000860528 | 34630  |  | 0.1     | 0.007478353 | 0.001028413 | 40165  |  | 0.1     | 0.474421945 | 7.15014E-07 | 40171  |  |
| 0.2    | 0.021537897 | 0.000896666 | 67966  |  | 0.2     | 0.0099656   | 0.00198044  | 61625  |  | 0.2     | 0.005571415 | 0.00118817  | 71711  |  | 0.2     | 0.277344824 | 6.0617E-05  | 71661  |  |
| 0.3    | 0.005722273 | 0.001400804 | 94074  |  | 0.3     | 0.002236762 | 0.002952405 | 85261  |  | 0.3     | 0.005623013 | 0.001115975 | 99336  |  | 0.3     | 0.463847295 | 1.4304E-06  | 99271  |  |
| 0.4    | 0.010682363 | 0.001160394 | 117505 |  | 0.4     | 0.000778514 | 0.003655898 | 106375 |  | 0.4     | 0.002800294 | 0.001332651 | 124147 |  | 0.4     | 0.400640185 | 1.10036E-05 | 124090 |  |
| 0.5    | 0.020865593 | 0.000908415 | 138345 |  | 0.5     | 0.00103158  | 0.003467256 | 125216 |  | 0.5     | 0.004383754 | 0.00119296  | 146279 |  | 0.5     | 0.42365704  | 6.43982E-06 | 146234 |  |

| AC 12:1 |             |             |        |  |
|---------|-------------|-------------|--------|--|
| thresh  | pval        | r2          | nsnps  |  |
| 0.001   | 0.225956115 | 7.56659E-05 | 940    |  |
| 0.05    | 0.305909956 | 3.44382E-05 | 22494  |  |
| 0.1     | 0.22791112  | 7.43665E-05 | 40453  |  |
| 0.2     | 0.246260661 | 6.29846E-05 | 72199  |  |
| 0.3     | 0.331051295 | 2.55385E-05 | 100028 |  |
| 0.4     | 0.217346563 | 8.16029E-05 | 124980 |  |
| 0.5     | 0.245605102 | 6.33671E-05 | 147267 |  |

| AC 14:1 |             |             |        |  |
|---------|-------------|-------------|--------|--|
| thresh  | pval        | r2          | nsnps  |  |
| 0.001   | 0.083813716 | 0.00025462  | 937    |  |
| 0.05    | 0.007813964 | 0.000781327 | 22483  |  |
| 0.1     | 0.023965261 | 0.000523124 | 40455  |  |
| 0.2     | 0.009279492 | 0.000741012 | 72184  |  |
| 0.3     | 0.001005959 | 0.001274916 | 100020 |  |
| 0.4     | 0.001303804 | 0.001211451 | 125005 |  |
| 0.5     | 0.000767039 | 0.001341513 | 147295 |  |

| AC 14:1 OH |             |             |        |  |
|------------|-------------|-------------|--------|--|
| thresh     | pval        | r2          | nsnps  |  |
| 0.001      | 0.011596792 | 0.002820097 | 819    |  |
| 0.05       | 0.34493891  | 8.72387E-05 | 18924  |  |
| 0.1        | 0.125903698 | 0.000719329 | 33867  |  |
| 0.2        | 0.084985106 | 0.001031361 | 60115  |  |
| 0.3        | 0.141117726 | 0.000633385 | 83126  |  |
| 0.4        | 0.11513235  | 0.000788306 | 103595 |  |
| 0.5        | 0.100442034 | 0.000896001 | 121840 |  |

| AC 14:2 |             |             |        |  |
|---------|-------------|-------------|--------|--|
| thresh  | pval        | r2          | nsnps  |  |
| 0.001   | 0.007645919 | 0.001021283 | 933    |  |
| 0.05    | 3.03739E-06 | 0.003548404 | 22348  |  |
| 0.1     | 5.22911E-10 | 0.006447342 | 40178  |  |
| 0.2     | 1.7651E-13  | 0.009144756 | 71669  |  |
| 0.3     | 7.70674E-14 | 0.009424936 | 99306  |  |
| 0.4     | 1.60549E-15 | 0.010734494 | 124131 |  |
| 0.5     | 2.19894E-15 | 0.010628057 | 146256 |  |

| AC 18:1 |             |             |        |  |
|---------|-------------|-------------|--------|--|
| thresh  | pval        | r2          | nsnps  |  |
| 0.001   | 0.252109337 | 6.75191E-05 | 939    |  |
| 0.05    | 0.455448369 | 1.89574E-06 | 22436  |  |
| 0.1     | 0.136229401 | 0.000182291 | 40355  |  |
| 0.2     | 0.034751902 | 0.000498619 | 72012  |  |
| 0.3     | 0.032294087 | 0.000516891 | 99786  |  |
| 0.4     | 0.024340645 | 0.000588127 | 124694 |  |
| 0.5     | 0.029210667 | 0.000542033 | 146946 |  |

| AC 18:2 |             |             |        |  |
|---------|-------------|-------------|--------|--|
| thresh  | pval        | r2          | nsnps  |  |
| 0.001   | 0.055540833 | 0.00033944  | 939    |  |
| 0.05    | 0.06351261  | 0.00031133  | 22484  |  |
| 0.1     | 0.02975524  | 0.000474743 | 40444  |  |
| 0.2     | 0.010433519 | 0.000713554 | 72168  |  |
| 0.3     | 0.006545513 | 0.000822979 | 100004 |  |
| 0.4     | 0.006905683 | 0.000810329 | 124991 |  |
| 0.5     | 0.015646692 | 0.000619866 | 147267 |  |

| 3-dehydrocarnitine |             |             |        |  |
|--------------------|-------------|-------------|--------|--|
| thresh             | pval        | r2          | nsnps  |  |
| 0.001              | 0.330756936 | 2.60E-05    | 868    |  |
| 0.05               | 0.055401083 | 0.000345375 | 20370  |  |
| 0.1                | 0.067499522 | 0.000303453 | 36492  |  |
| 0.2                | 0.058661453 | 0.000333147 | 64866  |  |
| 0.3                | 0.018150491 | 0.000595246 | 89560  |  |
| 0.4                | 0.014491161 | 0.000647618 | 111585 |  |
| 0.5                | 0.019060598 | 0.000583936 | 131211 |  |

| AC 6:0 |             |             |        |  |
|--------|-------------|-------------|--------|--|
| thresh | pval        | r2          | nsnps  |  |
| 0.001  | 0.434032153 | 3.76E-06    | 868    |  |
| 0.05   | 0.17326868  | 0.000120714 | 20369  |  |
| 0.1    | 0.147158584 | 0.000149821 | 36491  |  |
| 0.2    | 0.16880371  | 0.000125264 | 64864  |  |
| 0.3    | 0.02800675  | 0.000497377 | 89582  |  |
| 0.4    | 0.017742607 | 0.000602226 | 111582 |  |
| 0.5    | 0.030086073 | 0.000481169 | 131210 |  |

| AC 12:0 |             |             |        |  |
|---------|-------------|-------------|--------|--|
| thresh  | pval        | r2          | nsnps  |  |
| 0.001   | 0.102985027 | 0.000324725 | 869    |  |
| 0.05    | 0.385814891 | 1.71E-05    | 20368  |  |
| 0.1     | 0.329600173 | 3.95E-05    | 36491  |  |
| 0.2     | 0.444137066 | 4.01E-06    | 64878  |  |
| 0.3     | 0.325456698 | 4.16E-05    | 89604  |  |
| 0.4     | 0.197918621 | 0.000146372 | 111607 |  |
| 0.5     | 0.272943421 | 7.41E-05    | 131231 |  |

| AC 16:0 |             |          |        |  |
|---------|-------------|----------|--------|--|
| thresh  | pval        | r2       | nsnps  |  |
| 0.001   | 0.308178957 | 3.46E-05 | 868    |  |
| 0.05    | 0.455016566 | 1.76E-06 | 20368  |  |
| 0.1     | 0.31212147  | 3.31E-05 | 36491  |  |
| 0.2     | 0.326727262 | 2.78E-05 | 64868  |  |
| 0.3     | 0.481703424 | 2.90E-07 | 89558  |  |
| 0.4     | 0.270524086 | 5.15E-05 | 111587 |  |
| 0.5     | 0.322514328 | 2.92E-05 | 131213 |  |

| AC 18:0 |             |             |        |  |
|---------|-------------|-------------|--------|--|
| thresh  | pval        | r2          | nsnps  |  |
| 0.001   | 0.357702968 | 1.96E-05    | 869    |  |
| 0.05    | 0.005492914 | 0.000955159 | 20368  |  |
| 0.1     | 0.000775572 | 0.001478937 | 36489  |  |
| 0.2     | 3.92E-05    | 0.002301694 | 64864  |  |
| 0.3     | 5.89E-05    | 0.002188491 | 89555  |  |
| 0.4     | 1.11E-06    | 0.003304413 | 111588 |  |
| 0.5     | 2.53E-06    | 0.003071113 | 131212 |  |

### Glycerophospholipids metabolism - Shin et al., 2014

| Glycerol 3-phosphate (G3P) |             |             |        | Glycerophosphorylcholine (GPC) |             |             |        |
|----------------------------|-------------|-------------|--------|--------------------------------|-------------|-------------|--------|
| thresh                     | pval        | r2          | nsnps  | thresh                         | pval        | r2          | nsnps  |
| 0.001                      | 0.324870564 | 2.81E-05    | 869    | 0.001                          | 0.018015092 | 0.000647929 | 868    |
| 0.05                       | 0.077804675 | 0.000274786 | 20369  | 0.05                           | 0.30859204  | 3.68E-05    | 20370  |
| 0.1                        | 0.002044389 | 0.001122984 | 36491  | 0.1                            | 0.306744404 | 3.76E-05    | 36491  |
| 0.2                        | 0.001371654 | 0.00122193  | 64865  | 0.2                            | 0.181116999 | 0.000122395 | 64868  |
| 0.3                        | 0.005389355 | 0.000885725 | 89584  | 0.3                            | 0.227972311 | 8.20E-05    | 89567  |
| 0.4                        | 0.006734961 | 0.000831918 | 111584 | 0.4                            | 0.332453697 | 2.77E-05    | 111590 |
| 0.5                        | 0.007793852 | 0.000796847 | 131211 | 0.5                            | 0.496358544 | 1.23E-08    | 131220 |

### Monoacylglycerol (MAG) - Shin et al., 2014

| 1-linoleoylglycerol |             |             |        | 1-oleoylglycerol (MAG 18:1) |            |             |        | 1-palmitoylglycerol |             |             |        | 1-stearoylglycerol |             |             |        |
|---------------------|-------------|-------------|--------|-----------------------------|------------|-------------|--------|---------------------|-------------|-------------|--------|--------------------|-------------|-------------|--------|
| thresh              | pval        | r2          | nsnps  | thresh                      | pval       | r2          | nsnps  | thresh              | pval        | r2          | nsnps  | thresh             | pval        | r2          | nsnps  |
| 0.001               | 0.073103925 | 0.000764976 | 868    | 0.001                       | 0.40315649 | 1.11E-05    | 869    | 0.001               | 0.008669214 | 0.000808615 | 867    | 0.001              | 0.319882093 | 3.34E-05    | 869    |
| 0.05                | 0.438578137 | 8.66E-06    | 20369  | 0.05                        | 3.22E-08   | 0.005362258 | 20371  | 0.05                | 0.070039054 | 0.00031101  | 20363  | 0.05               | 0.154894862 | 0.000157335 | 20372  |
| 0.1                 | 0.422528045 | 1.38E-05    | 36490  | 0.1                         | 2.42E-09   | 0.006281556 | 36495  | 0.1                 | 0.214714205 | 8.92E-05    | 36487  | 0.1                | 0.041866041 | 0.000456109 | 36496  |
| 0.2                 | 0.450349418 | 5.64E-06    | 64864  | 0.2                         | 4.70E-09   | 0.006045121 | 64876  | 0.2                 | 0.29811268  | 4.01E-05    | 64869  | 0.2                | 0.005935524 | 0.000965066 | 64873  |
| 0.3                 | 0.338177805 | 6.32E-05    | 89558  | 0.3                         | 5.04E-09   | 0.006020721 | 89589  | 0.3                 | 0.301656034 | 3.86E-05    | 89566  | 0.3                | 0.001151744 | 0.001416091 | 89595  |
| 0.4                 | 0.263770481 | 0.000144653 | 111580 | 0.4                         | 1.08E-09   | 0.006569361 | 111589 | 0.4                 | 0.308270138 | 3.58E-05    | 111588 | 0.4                | 0.002401032 | 0.001212278 | 111598 |
| 0.5                 | 0.256513711 | 0.000155076 | 131208 | 0.5                         | 1.35E-08   | 0.005670375 | 131216 | 0.5                 | 0.294261263 | 4.18E-05    | 131212 | 0.5                | 0.002247686 | 0.001230485 | 131221 |

### Diacylglycerol (DAG) - Rhee et al., 2013

| DAG 34:1 |             |             |        | DAG 34:2 |             |             |        | DAG 36:1 |             |             |        | DAG 36:2 |             |             |        |
|----------|-------------|-------------|--------|----------|-------------|-------------|--------|----------|-------------|-------------|--------|----------|-------------|-------------|--------|
| thresh   | pval        | r2          | nsnps  | thresh   | pval        | r2          | nsnps  | thresh   | pval        | r2          | nsnps  | thresh   | pval        | r2          | nsnps  |
| 0.001    | 0.03466996  | 0.001587648 | 962    | 0.001    | 0.011659869 | 0.002475029 | 962    | 0.001    | 0.243505182 | 0.000232692 | 962    | 0.001    | 0.00182665  | 0.00406137  | 962    |
| 0.05     | 0.211885045 | 0.000308159 | 23182  | 0.05     | 0.094936535 | 0.000827501 | 23182  | 0.05     | 0.294793295 | 0.000140159 | 23182  | 0.05     | 0.068250779 | 0.00106733  | 23182  |
| 0.1      | 0.490371671 | 2.80633E-07 | 41762  | 0.1      | 0.25003264  | 0.00021905  | 41762  | 0.1      | 0.329014861 | 9.43721E-05 | 41762  | 0.1      | 0.164043276 | 0.000460605 | 41762  |
| 0.2      | 0.352511407 | 6.90243E-05 | 74775  | 0.2      | 0.346480063 | 7.50933E-05 | 74775  | 0.2      | 0.148839556 | 0.000522293 | 74775  | 0.2      | 0.142528618 | 0.00055034  | 74775  |
| 0.3      | 0.387575276 | 3.93021E-05 | 103797 | 0.3      | 0.353316635 | 6.82361E-05 | 103797 | 0.3      | 0.104137999 | 0.000762411 | 103797 | 0.3      | 0.176331216 | 0.000416028 | 103797 |
| 0.4      | 0.206551333 | 0.000322613 | 129896 | 0.4      | 0.497803135 | 1.46071E-08 | 129896 | 0.4      | 0.033762493 | 0.001608619 | 129896 | 0.4      | 0.304163471 | 0.000126494 | 129896 |
| 0.5      | 0.218473051 | 0.000291041 | 153317 | 0.5      | 0.493380323 | 1.32637E-07 | 153317 | 0.5      | 0.040989655 | 0.001456173 | 153317 | 0.5      | 0.332571724 | 9.02347E-05 | 153317 |

### Triacylglycerol (TAG) - Rhee et al., 2013

| TAG 44:1 |             |             |        | TAG 46:0 |             |             |        | TAG 46:1 |             |             |        | TAG 46:2 |             |             |        |
|----------|-------------|-------------|--------|----------|-------------|-------------|--------|----------|-------------|-------------|--------|----------|-------------|-------------|--------|
| thresh   | pval        | r2          | nsnps  | thresh   | pval        | r2          | nsnps  | thresh   | pval        | r2          | nsnps  | thresh   | pval        | r2          | nsnps  |
| 0.001    | 0.398221875 | 3.20512E-05 | 962    | 0.001    | 0.140644717 | 0.00055902  | 962    | 0.001    | 0.234401102 | 0.000252761 | 962    | 0.001    | 0.193372044 | 0.000360799 | 962    |
| 0.05     | 0.044601712 | 0.001390502 | 23182  | 0.05     | 0.018783833 | 0.00208092  | 23182  | 0.05     | 0.039913268 | 0.001476957 | 23182  | 0.05     | 0.045025419 | 0.001383178 | 23171  |
| 0.1      | 0.000246738 | 0.005830795 | 41762  | 0.1      | 0.000345301 | 0.005531069 | 41762  | 0.1      | 0.00055939  | 0.005107973 | 41762  | 0.1      | 0.000202782 | 0.006006158 | 41739  |
| 0.2      | 0.000155401 | 0.006244463 | 74775  | 0.2      | 0.000200776 | 0.006015053 | 74775  | 0.2      | 0.000583685 | 0.005064823 | 74775  | 0.2      | 0.000133232 | 0.006382506 | 74736  |
| 0.3      | 2.49247E-05 | 0.007894412 | 103797 | 0.3      | 0.000377513 | 0.005451683 | 103797 | 0.3      | 0.000125481 | 0.006436302 | 103797 | 0.3      | 2.49241E-05 | 0.007894431 | 103744 |
| 0.4      | 2.01276E-06 | 0.01018509  | 129896 | 0.4      | 0.000214616 | 0.005955435 | 129896 | 0.4      | 1.37374E-05 | 0.008434839 | 129896 | 0.4      | 1.62276E-06 | 0.010381976 | 129829 |
| 0.5      | 9.18986E-06 | 0.008800272 | 153317 | 0.5      | 0.000898959 | 0.004683218 | 153317 | 0.5      | 5.35224E-05 | 0.007203316 | 153317 | 0.5      | 6.15463E-06 | 0.009165212 | 153243 |

  

| TAG 48:0 |             |             |        | TAG 48:1 |             |             |        | TAG 48:2 |             |             |        | TAG 48:3 |             |             |        |
|----------|-------------|-------------|--------|----------|-------------|-------------|--------|----------|-------------|-------------|--------|----------|-------------|-------------|--------|
| thresh   | pval        | r2          | nsnps  | thresh   | pval        | r2          | nsnps  | thresh   | pval        | r2          | nsnps  | thresh   | pval        | r2          | nsnps  |
| 0.001    | 0.460037339 | 4.84972E-06 | 962    | 0.001    | 0.223393952 | 0.000278761 | 962    | 0.001    | 0.074319884 | 0.001004387 | 962    | 0.001    | 0.034770334 | 0.001585365 | 962    |
| 0.05     | 0.017273698 | 0.002149616 | 23182  | 0.05     | 0.036401029 | 0.001549225 | 23182  | 0.05     | 0.074072693 | 0.001006836 | 23182  | 0.05     | 0.121612907 | 0.000655758 | 23182  |
| 0.1      | 0.001035165 | 0.004558995 | 41762  | 0.1      | 0.001434473 | 0.004272635 | 41762  | 0.1      | 0.0023102   | 0.003856866 | 41762  | 0.1      | 0.002755319 | 0.003703983 | 41762  |
| 0.2      | 0.000283447 | 0.005706995 | 74775  | 0.2      | 0.000845186 | 0.0047376   | 74775  | 0.2      | 0.002045313 | 0.003962812 | 74775  | 0.2      | 0.004668042 | 0.003249707 | 74775  |
| 0.3      | 7.80756E-05 | 0.006862924 | 103797 | 0.3      | 0.000402841 | 0.005393926 | 103797 | 0.3      | 0.001075728 | 0.00452519  | 103797 | 0.3      | 0.001907411 | 0.004023637 | 103797 |
| 0.4      | 1.91421E-05 | 0.008133702 | 129896 | 0.4      | 5.73818E-05 | 0.007140491 | 129896 | 0.4      | 0.000137483 | 0.006354319 | 129896 | 0.4      | 0.000315067 | 0.005612698 | 129896 |
| 0.5      | 4.80431E-05 | 0.007300815 | 153317 | 0.5      | 0.000185473 | 0.006086002 | 153317 | 0.5      | 0.000433306 | 0.005329125 | 153317 | 0.5      | 0.00074866  | 0.004844638 | 153317 |

Table TAG 48:4 with columns: thresh, pval, r2, nsnp. Rows show p-values ranging from 0.001 to 0.5 and r2 values from 0.042565115 to 0.049402228.

Table TAG 50:1 with columns: thresh, pval, r2, nsnp. Rows show p-values ranging from 0.001 to 0.5 and r2 values from 0.194328593 to 0.11315019.

Table TAG 50:2 with columns: thresh, pval, r2, nsnp. Rows show p-values ranging from 0.001 to 0.5 and r2 values from 0.106894378 to 0.000138918.

Table TAG 50:3 with columns: thresh, pval, r2, nsnp. Rows show p-values ranging from 0.001 to 0.5 and r2 values from 0.006523313 to 0.005951753.

Table TAG 50:4 with columns: thresh, pval, r2, nsnp. Rows show p-values ranging from 0.001 to 0.5 and r2 values from 0.006266615 to 0.08605345.

Table TAG 50:5 with columns: thresh, pval, r2, nsnp. Rows show p-values ranging from 0.001 to 0.5 and r2 values from 0.036143836 to 0.117584296.

Table TAG 52:1 with columns: thresh, pval, r2, nsnp. Rows show p-values ranging from 0.001 to 0.5 and r2 values from 0.096687888 to 0.10825562.

Table TAG 52:2 with columns: thresh, pval, r2, nsnp. Rows show p-values ranging from 0.001 to 0.5 and r2 values from 0.035547758 to 0.414552402.

Table TAG 52:3 with columns: thresh, pval, r2, nsnp. Rows show p-values ranging from 0.001 to 0.5 and r2 values from 0.002730702 to 0.074276232.

Table TAG 52:4 with columns: thresh, pval, r2, nsnp. Rows show p-values ranging from 0.001 to 0.5 and r2 values from 0.012036385 to 0.143023154.

Table TAG 52:5 with columns: thresh, pval, r2, nsnp. Rows show p-values ranging from 0.001 to 0.5 and r2 values from 0.00494921 to 0.055772399.

Table TAG 52:6 with columns: thresh, pval, r2, nsnp. Rows show p-values ranging from 0.001 to 0.5 and r2 values from 0.013739856 to 0.05434084.

Table TAG 54:1 with columns: thresh, pval, r2, nsnp. Rows show p-values ranging from 0.001 to 0.5 and r2 values from 0.181893301 to 0.105663283.

Table TAG 54:2 with columns: thresh, pval, r2, nsnp. Rows show p-values ranging from 0.001 to 0.5 and r2 values from 0.033858641 to 0.467772883.

Table TAG 54:3 with columns: thresh, pval, r2, nsnp. Rows show p-values ranging from 0.001 to 0.5 and r2 values from 0.015652718 to 0.211621362.

Table TAG 54:4 with columns: thresh, pval, r2, nsnp. Rows show p-values ranging from 0.001 to 0.5 and r2 values from 0.06804351 to 0.002765708.

Table TAG 54:5:PC1 with columns: thresh, pval, r2, nsnp. Rows show p-values ranging from 0.001 to 0.5 and r2 values from 0.148504454 to 0.064319156.

Table TAG 54:6:PC1 with columns: thresh, pval, r2, nsnp. Rows show p-values ranging from 0.001 to 0.5 and r2 values from 0.052254426 to 0.242105376.

Table TAG 54:7:PC1 with columns: thresh, pval, r2, nsnp. Rows show p-values ranging from 0.001 to 0.5 and r2 values from 0.030980325 to 0.458125513.

Table TAG 54:8 with columns: thresh, pval, r2, nsnp. Rows show p-values ranging from 0.001 to 0.5 and r2 values from 0.240247645 to 0.410123324.

Table TAG 54:9 with columns: thresh, pval, r2, nsnp. Rows show p-values ranging from 0.001 to 0.5 and r2 values from 0.016992489 to 0.059412912.

Table TAG 56:2 with columns: thresh, pval, r2, nsnp. Rows show p-values ranging from 0.001 to 0.5 and r2 values from 0.277032714 to 0.354252246.

Table TAG 56:3 with columns: thresh, pval, r2, nsnp. Rows show p-values ranging from 0.001 to 0.5 and r2 values from 0.173296923 to 0.103960255.

Table TAG 56:4 with columns: thresh, pval, r2, nsnp. Rows show p-values ranging from 0.001 to 0.5 and r2 values from 0.139549025 to 0.00934206.

| TAG 56:5:PC1 |             |             |       |        |
|--------------|-------------|-------------|-------|--------|
| thresh       | pval        | r2          | nsnps |        |
| 0.001        | 0.47431551  | 1.99938E-06 |       | 962    |
| 0.05         | 0.338435269 | 8.36526E-05 |       | 23182  |
| 0.1          | 0.394071041 | 3.47839E-05 |       | 41762  |
| 0.2          | 0.496425758 | 3.86662E-08 |       | 74775  |
| 0.3          | 0.458976225 | 5.11161E-06 |       | 103797 |
| 0.4          | 0.470800987 | 2.58503E-06 |       | 129896 |
| 0.5          | 0.455406988 | 6.04365E-06 |       | 153317 |

| TAG 56:6:PC1 |             |             |       |        |
|--------------|-------------|-------------|-------|--------|
| thresh       | pval        | r2          | nsnps |        |
| 0.001        | 0.450438484 | 7.4728E-06  |       | 962    |
| 0.05         | 0.342703984 | 7.90439E-05 |       | 23182  |
| 0.1          | 0.357384462 | 6.43333E-05 |       | 41762  |
| 0.2          | 0.460082507 | 4.83873E-06 |       | 74775  |
| 0.3          | 0.457820135 | 5.40486E-06 |       | 103797 |
| 0.4          | 0.470083327 | 2.7139E-06  |       | 129896 |
| 0.5          | 0.408995113 | 2.55103E-05 |       | 153317 |

| TAG 56:7:PC1 |             |             |       |        |
|--------------|-------------|-------------|-------|--------|
| thresh       | pval        | r2          | nsnps |        |
| 0.001        | 0.143916921 | 0.000544036 |       | 962    |
| 0.05         | 0.088070676 | 0.000881058 |       | 23182  |
| 0.1          | 0.117174971 | 0.000681012 |       | 41762  |
| 0.2          | 0.300151717 | 0.000132235 |       | 74775  |
| 0.3          | 0.104589427 | 0.000759394 |       | 103797 |
| 0.4          | 0.131750577 | 0.000602068 |       | 129896 |
| 0.5          | 0.109976413 | 0.000724535 |       | 153317 |

| TAG 56:8:PC1 |             |             |       |        |
|--------------|-------------|-------------|-------|--------|
| thresh       | pval        | r2          | nsnps |        |
| 0.001        | 0.153910303 | 0.00050084  |       | 962    |
| 0.05         | 0.174214922 | 0.000423401 |       | 23182  |
| 0.1          | 0.248504882 | 0.000222189 |       | 41762  |
| 0.2          | 0.416841288 | 2.12387E-05 |       | 74775  |
| 0.3          | 0.356369892 | 6.52945E-05 |       | 103797 |
| 0.4          | 0.427197384 | 1.62221E-05 |       | 129896 |
| 0.5          | 0.369610914 | 5.33761E-05 |       | 153317 |

| TAG 56:9:PC1 |             |             |       |        |
|--------------|-------------|-------------|-------|--------|
| thresh       | pval        | r2          | nsnps |        |
| 0.001        | 0.354255589 | 6.73236E-05 |       | 962    |
| 0.05         | 0.294399011 | 0.000140754 |       | 23182  |
| 0.1          | 0.215319941 | 0.000299135 |       | 41762  |
| 0.2          | 0.048963593 | 0.001318485 |       | 74775  |
| 0.3          | 0.10326407  | 0.000768297 |       | 103797 |
| 0.4          | 0.048866173 | 0.001320016 |       | 129896 |
| 0.5          | 0.057325427 | 0.00119818  |       | 153317 |

| TAG 56:10 |             |             |       |        |
|-----------|-------------|-------------|-------|--------|
| thresh    | pval        | r2          | nsnps |        |
| 0.001     | 0.148012656 | 0.00052588  |       | 962    |
| 0.05      | 0.10535846  | 0.000754289 |       | 23182  |
| 0.1       | 0.095412609 | 0.000823955 |       | 41762  |
| 0.2       | 0.12317422  | 0.000647138 |       | 74775  |
| 0.3       | 0.056020144 | 0.00121564  |       | 103797 |
| 0.4       | 0.148525734 | 0.000523651 |       | 129896 |
| 0.5       | 0.122034887 | 0.000653415 |       | 153317 |

| TAG 56:6 |             |             |       |        |
|----------|-------------|-------------|-------|--------|
| thresh   | pval        | r2          | nsnps |        |
| 0.001    | 0.057772967 | 0.001192294 |       | 962    |
| 0.05     | 0.45909098  | 5.08295E-06 |       | 23182  |
| 0.1      | 0.237947345 | 0.000244795 |       | 41762  |
| 0.2      | 0.307118059 | 0.000122368 |       | 74775  |
| 0.3      | 0.210616651 | 0.000311547 |       | 103797 |
| 0.4      | 0.337959446 | 8.41758E-05 |       | 129896 |
| 0.5      | 0.260137166 | 0.000199089 |       | 153317 |

| TAG 56:7 |             |             |       |        |
|----------|-------------|-------------|-------|--------|
| thresh   | pval        | r2          | nsnps |        |
| 0.001    | 0.345503188 | 7.61041E-05 |       | 962    |
| 0.05     | 0.128696705 | 0.000617691 |       | 23182  |
| 0.1      | 0.014154459 | 0.002313868 |       | 41762  |
| 0.2      | 0.009830649 | 0.00261782  |       | 74775  |
| 0.3      | 0.019247676 | 0.002060975 |       | 103797 |
| 0.4      | 0.018673468 | 0.002085741 |       | 129896 |
| 0.5      | 0.013388507 | 0.002359991 |       | 153317 |

| TAG 58:8 PC1 |             |             |       |        |
|--------------|-------------|-------------|-------|--------|
| thresh       | pval        | r2          | nsnps |        |
| 0.001        | 0.463807321 | 3.97546E-06 |       | 962    |
| 0.05         | 0.100562464 | 0.000786871 |       | 23182  |
| 0.1          | 0.032242139 | 0.00164514  |       | 41762  |
| 0.2          | 0.0941737   | 0.000833226 |       | 74775  |
| 0.3          | 0.017237408 | 0.002151343 |       | 103797 |
| 0.4          | 0.016547505 | 0.00218492  |       | 129896 |
| 0.5          | 0.015332248 | 0.002247782 |       | 153317 |

| TAG 58:9 PC1 |             |             |       |        |
|--------------|-------------|-------------|-------|--------|
| thresh       | pval        | r2          | nsnps |        |
| 0.001        | 0.2749919   | 0.000172117 |       | 962    |
| 0.05         | 0.230651713 | 0.000261397 |       | 23182  |
| 0.1          | 0.19812161  | 0.000346615 |       | 41762  |
| 0.2          | 0.449463121 | 7.77143E-06 |       | 74775  |
| 0.3          | 0.164382753 | 0.000459314 |       | 103797 |
| 0.4          | 0.168176748 | 0.000445123 |       | 129896 |
| 0.5          | 0.160310732 | 0.000475036 |       | 153317 |

| TAG 58:10 PC1 |             |             |       |        |
|---------------|-------------|-------------|-------|--------|
| thresh        | pval        | r2          | nsnps |        |
| 0.001         | 0.095012027 | 0.000826937 |       | 962    |
| 0.05          | 0.021554749 | 0.001968726 |       | 23182  |
| 0.1           | 0.079202004 | 0.000957824 |       | 41762  |
| 0.2           | 0.274263955 | 0.000173377 |       | 74775  |
| 0.3           | 0.189321554 | 0.000373294 |       | 103797 |
| 0.4           | 0.31720079  | 0.000108924 |       | 129896 |
| 0.5           | 0.276236788 | 0.000169978 |       | 153317 |

| TAG 58:11 PC1 |             |             |       |        |
|---------------|-------------|-------------|-------|--------|
| thresh        | pval        | r2          | nsnps |        |
| 0.001         | 0.357805632 | 6.39366E-05 |       | 962    |
| 0.05          | 0.087382699 | 0.00088669  |       | 23182  |
| 0.1           | 0.043578054 | 0.001408512 |       | 41762  |
| 0.2           | 0.090765383 | 0.00085948  |       | 74775  |
| 0.3           | 0.036080223 | 0.001556196 |       | 103797 |
| 0.4           | 0.101442453 | 0.000780757 |       | 129896 |
| 0.5           | 0.105197729 | 0.000755352 |       | 153317 |

| TAG 58:12 |             |             |       |        |
|-----------|-------------|-------------|-------|--------|
| thresh    | pval        | r2          | nsnps |        |
| 0.001     | 0.092708217 | 0.000844377 |       | 962    |
| 0.05      | 0.056163172 | 0.001213705 |       | 23182  |
| 0.1       | 0.017497674 | 0.002139039 |       | 41762  |
| 0.2       | 0.023073369 | 0.001913499 |       | 74775  |
| 0.3       | 0.016249065 | 0.002199901 |       | 103797 |
| 0.4       | 0.051054362 | 0.001286404 |       | 129896 |
| 0.5       | 0.04207479  | 0.001435807 |       | 153317 |

| TAG 60:12 PC1 |             |             |       |        |
|---------------|-------------|-------------|-------|--------|
| thresh        | pval        | r2          | nsnps |        |
| 0.001         | 0.29224319  | 0.000144035 |       | 962    |
| 0.05          | 0.158321798 | 0.000482908 |       | 23182  |
| 0.1           | 0.087878533 | 0.000882626 |       | 41762  |
| 0.2           | 0.256567639 | 0.000205985 |       | 74775  |
| 0.3           | 0.184518388 | 0.000388607 |       | 103797 |
| 0.4           | 0.239241171 | 0.000241936 |       | 129896 |
| 0.5           | 0.208309511 | 0.000317788 |       | 153317 |

| Serum.TG (serum total triglycerides) |             |             |       |        |
|--------------------------------------|-------------|-------------|-------|--------|
| thresh                               | pval        | r2          | nsnps |        |
| 0.001                                | 0.439726388 | 1.06761E-06 |       | 1412   |
| 0.05                                 | 0.413270076 | 2.22895E-06 |       | 35088  |
| 0.1                                  | 0.087577202 | 8.53185E-05 |       | 63094  |
| 0.2                                  | 0.026289953 | 0.000174374 |       | 112128 |
| 0.3                                  | 0.020693245 | 0.000193071 |       | 155513 |
| 0.4                                  | 0.019993972 | 0.000195775 |       | 193882 |
| 0.5                                  | 0.023262038 | 0.000183901 |       | 228369 |



| PC 24:0 |             |             |        | PC 28:1 |             |             |        | PC 30:0 |              |             |        | PC 32:0 |             |             |        |
|---------|-------------|-------------|--------|---------|-------------|-------------|--------|---------|--------------|-------------|--------|---------|-------------|-------------|--------|
| thresh  | pval        | r2          | nsnps  | thresh  | pval        | r2          | nsnps  | thresh  | pval         | r2          | nsnps  | thresh  | pval        | r2          | nsnps  |
| 0.001   | 0.113076419 | 0.000383307 | 900    | 0.001   | 0.00074349  | 0.001349006 | 938    | 0.001   | 0.160494446  | 0.000131717 | 939    | 0.001   | 0.061722496 | 0.000317331 | 939    |
| 0.05    | 0.081042123 | 0.00051143  | 21379  | 0.05    | 0.058745432 | 0.000327635 | 22493  | 0.05    | 0.241980165  | 6.55223E-05 | 22488  | 0.05    | 0.370532692 | 1.46037E-05 | 22491  |
| 0.1     | 0.005668297 | 0.001676629 | 38383  | 0.1     | 0.020835679 | 0.000554607 | 40450  | 0.1     | 0.168127753  | 0.000123659 | 40448  | 0.1     | 0.095795142 | 0.000228053 | 40443  |
| 0.2     | 0.007980098 | 0.001518671 | 68472  | 0.2     | 0.005974143 | 0.000844592 | 72166  | 0.2     | 0.165347922  | 0.000126536 | 72195  | 0.2     | 0.057364944 | 0.000332676 | 72174  |
| 0.3     | 0.005808242 | 0.001665318 | 94926  | 0.3     | 0.003187751 | 0.000994555 | 99996  | 0.3     | 0.309792362  | 3.29608E-05 | 100017 | 0.3     | 0.025648368 | 0.000507903 | 100003 |
| 0.4     | 0.005627103 | 0.001680013 | 118543 | 0.4     | 0.001963092 | 0.001111663 | 124985 | 0.4     | 0.323953336  | 2.78917E-05 | 124995 | 0.4     | 0.017719106 | 0.000591498 | 124961 |
| 0.5     | 0.007762254 | 0.001531395 | 139633 | 0.5     | 0.004275382 | 0.000924196 | 147284 | 0.5     | 0.229486098  | 7.33422E-05 | 147290 | 0.5     | 0.019650894 | 0.000567951 | 147257 |
| PC 32:1 |             |             |        | PC 32:2 |             |             |        | PC 32:3 |              |             |        | PC 34:1 |             |             |        |
| thresh  | pval        | r2          | nsnps  | thresh  | pval        | r2          | nsnps  | thresh  | pval         | r2          | nsnps  | thresh  | pval        | r2          | nsnps  |
| 0.001   | 0.39796862  | 8.94571E-06 | 941    | 0.001   | 0.431792269 | 3.94753E-06 | 941    | 0.001   | 0.001372077  | 0.001198829 | 940    | 0.001   | 0.293549535 | 3.94398E-05 | 941    |
| 0.05    | 0.152094319 | 0.000141207 | 22492  | 0.05    | 0.493332541 | 3.73556E-08 | 22507  | 0.05    | 0.0012547848 | 0.000670712 | 22490  | 0.05    | 0.383687108 | 1.17031E-05 | 22483  |
| 0.1     | 0.214910104 | 8.33712E-05 | 40446  | 0.1     | 0.342930207 | 2.38777E-05 | 40452  | 0.1     | 0.003199206  | 0.000993693 | 40446  | 0.1     | 0.220503806 | 7.93949E-05 | 40445  |
| 0.2     | 0.076943295 | 0.000271939 | 72186  | 0.2     | 0.480303496 | 3.26231E-07 | 72193  | 0.2     | 0.000860738  | 0.001313003 | 72178  | 0.2     | 0.02579529  | 0.000506625 | 72183  |
| 0.3     | 0.019676804 | 0.000567728 | 100027 | 0.3     | 0.354704422 | 1.85701E-05 | 100043 | 0.3     | 7.4663E-05   | 0.001921218 | 100014 | 0.3     | 0.009253022 | 0.00074168  | 100010 |
| 0.4     | 0.017255826 | 0.000597624 | 124996 | 0.4     | 0.446195517 | 2.44724E-06 | 125036 | 0.4     | 1.84925E-05  | 0.002273443 | 124986 | 0.4     | 0.006020607 | 0.000842869 | 124989 |
| 0.5     | 0.028684485 | 0.00048301  | 147284 | 0.5     | 0.389915528 | 1.04496E-05 | 147317 | 0.5     | 9.60549E-05  | 0.001857957 | 147266 | 0.5     | 0.009394356 | 0.000738135 | 147286 |
| PC 34:2 |             |             |        | PC 34:3 |             |             |        | PC 34:4 |              |             |        | PC 36:0 |             |             |        |
| thresh  | pval        | r2          | nsnps  | thresh  | pval        | r2          | nsnps  | thresh  | pval         | r2          | nsnps  | thresh  | pval        | r2          | nsnps  |
| 0.001   | 0.007489749 | 0.000791192 | 939    | 0.001   | 0.4138743   | 6.33127E-06 | 940    | 0.001   | 0.226877973  | 7.5051E-05  | 942    | 0.001   | 0.429123907 | 4.26581E-06 | 939    |
| 0.05    | 0.103380618 | 0.000213131 | 22493  | 0.05    | 0.223528224 | 7.73043E-05 | 22486  | 0.05    | 0.461942682  | 1.22065E-06 | 22497  | 0.05    | 0.015461    | 0.000622605 | 22487  |
| 0.1     | 0.012399713 | 0.000673461 | 40448  | 0.1     | 0.161235471 | 0.000130895 | 40434  | 0.1     | 0.469806484  | 7.67454E-07 | 40442  | 0.1     | 0.060006246 | 0.000323184 | 40429  |
| 0.2     | 0.003198063 | 0.000993779 | 72171  | 0.2     | 0.054252307 | 0.0003444   | 72182  | 0.2     | 0.451556794  | 1.98154E-06 | 72194  | 0.2     | 0.042612768 | 0.00039606  | 72165  |
| 0.3     | 0.000814402 | 0.0013266   | 100012 | 0.3     | 0.02633442  | 0.000501933 | 100021 | 0.3     | 0.324333188  | 2.77591E-05 | 100038 | 0.3     | 0.03433885  | 0.000443114 | 100011 |
| 0.4     | 0.000756048 | 0.001344885 | 124985 | 0.4     | 0.012979835 | 0.000662886 | 125001 | 0.4     | 0.261289609  | 5.46655E-05 | 125030 | 0.4     | 0.035743728 | 0.000434318 | 124995 |
| 0.5     | 0.001787153 | 0.001134464 | 147282 | 0.5     | 0.023139699 | 0.000530936 | 147308 | 0.5     | 0.394573412  | 9.56304E-06 | 147303 | 0.5     | 0.024973657 | 0.000513806 | 147271 |
| PC 36:1 |             |             |        | PC 36:2 |             |             |        | PC 36:3 |              |             |        | PC 36:4 |             |             |        |
| thresh  | pval        | r2          | nsnps  | thresh  | pval        | r2          | nsnps  | thresh  | pval         | r2          | nsnps  | thresh  | pval        | r2          | nsnps  |
| 0.001   | 0.165735149 | 0.000126165 | 941    | 0.001   | 0.002151654 | 0.001089428 | 940    | 0.001   | 0.022394858  | 0.000538378 | 939    | 0.001   | 0.05351372  | 0.000347302 | 939    |
| 0.05    | 0.458115893 | 1.48002E-06 | 22482  | 0.05    | 0.136560337 | 0.000160592 | 22486  | 0.05    | 0.288395825  | 4.16536E-05 | 22485  | 0.05    | 0.053392337 | 0.000347783 | 22492  |
| 0.1     | 0.434734161 | 3.61279E-06 | 40445  | 0.1     | 0.077753114 | 0.00026974  | 40443  | 0.1     | 0.134185145  | 0.00016383  | 40443  | 0.1     | 0.220825178 | 7.91612E-05 | 40446  |
| 0.2     | 0.46442424  | 1.06667E-06 | 72184  | 0.2     | 0.068710893 | 0.000295035 | 72174  | 0.2     | 0.175877536  | 0.000115964 | 72169  | 0.2     | 0.180341659 | 0.000111723 | 72179  |
| 0.3     | 0.343898709 | 2.16025E-05 | 100009 | 0.3     | 0.025970414 | 0.000505044 | 100031 | 0.3     | 0.057943096  | 0.000330567 | 100000 | 0.3     | 0.16796828  | 0.000123806 | 100024 |
| 0.4     | 0.317410593 | 3.01774E-05 | 124992 | 0.4     | 0.022800357 | 0.000534263 | 125024 | 0.4     | 0.048946344  | 0.000366329 | 124982 | 0.4     | 0.278586571 | 4.60838E-05 | 125005 |
| 0.5     | 0.41679069  | 5.90586E-06 | 147280 | 0.5     | 0.044891682 | 0.000384822 | 147319 | 0.5     | 0.085253445  | 0.000251203 | 147268 | 0.5     | 0.218505031 | 8.07831E-05 | 147286 |
| PC 36:5 |             |             |        | PC 36:6 |             |             |        | PC 38:0 |              |             |        | PC 38:1 |             |             |        |
| thresh  | pval        | r2          | nsnps  | thresh  | pval        | r2          | nsnps  | thresh  | pval         | r2          | nsnps  | thresh  | pval        | r2          | nsnps  |
| 0.001   | 0.323415219 | 2.80863E-05 | 938    | 0.001   | 0.272993655 | 4.87622E-05 | 940    | 0.001   | 0.336756354  | 2.37388E-05 | 941    | 0.001   | 0.467593719 | 4.41746E-06 | 834    |
| 0.05    | 0.49117651  | 6.54604E-08 | 22492  | 0.05    | 0.245356476 | 6.35296E-05 | 22486  | 0.05    | 0.4180173    | 5.72824E-06 | 22497  | 0.05    | 0.273510104 | 0.000242244 | 19726  |
| 0.1     | 0.393556432 | 9.75822E-06 | 40465  | 0.1     | 0.32321636  | 2.81466E-05 | 40461  | 0.1     | 0.384974129  | 1.14365E-05 | 40436  | 0.1     | 0.43537637  | 1.76833E-05 | 35355  |
| 0.2     | 0.249454588 | 6.11777E-05 | 72205  | 0.2     | 0.337487818 | 2.35199E-05 | 72215  | 0.2     | 0.490412734  | 7.72445E-08 | 72169  | 0.2     | 0.337393316 | 0.000117598 | 62873  |
| 0.3     | 0.304818002 | 3.4881E-05  | 100025 | 0.3     | 0.319666987 | 2.93755E-05 | 100035 | 0.3     | 0.403655691  | 7.95467E-06 | 100013 | 0.3     | 0.336559502 | 0.000118881 | 87055  |
| 0.4     | 0.384548465 | 1.15299E-05 | 125000 | 0.4     | 0.25727043  | 5.68231E-05 | 125016 | 0.4     | 0.435545602  | 3.52131E-06 | 125012 | 0.4     | 0.42062052  | 2.68017E-05 | 108410 |
| 0.5     | 0.452766827 | 1.88433E-06 | 147309 | 0.5     | 0.181291885 | 0.000110872 | 147306 | 0.5     | 0.497107586  | 7.02947E-09 | 147294 | 0.5     | 0.37180836  | 7.14559E-05 | 127585 |
| PC 38:2 |             |             |        | PC 38:3 |             |             |        | PC 38:4 |              |             |        | PC 38:5 |             |             |        |
| thresh  | pval        | r2          | nsnps  | thresh  | pval        | r2          | nsnps  | thresh  | pval         | r2          | nsnps  | thresh  | pval        | r2          | nsnps  |
| 0.001   | 0.029338601 | 0.001720284 | 962    | 0.001   | 0.0092093   | 0.000742788 | 937    | 0.001   | 0.006558335  | 0.000822736 | 938    | 0.001   | 0.248757718 | 6.15429E-05 | 938    |
| 0.05    | 0.001454948 | 0.004260226 | 23182  | 0.05    | 0.499898907 | 8.58813E-12 | 22483  | 0.05    | 0.144052533  | 0.000150932 | 22491  | 0.05    | 0.036929771 | 0.000427175 | 22489  |
| 0.1     | 0.011862444 | 0.002460663 | 41762  | 0.1     | 0.371917991 | 1.42815E-05 | 40448  | 0.1     | 0.237255509  | 6.84102E-05 | 40445  | 0.1     | 0.038262246 | 0.000419438 | 40457  |
| 0.2     | 0.002353457 | 0.003840747 | 74775  | 0.2     | 0.159037575 | 0.000133313 | 72172  | 0.2     | 0.112191753  | 0.000197428 | 72164  | 0.2     | 0.021242972 | 0.000550228 | 72171  |
| 0.3     | 0.000376163 | 0.00545487  | 103797 | 0.3     | 0.429427691 | 4.2295E-06  | 100006 | 0.3     | 0.129427427  | 0.000170514 | 99991  | 0.3     | 0.012924283 | 0.000663877 | 100005 |

0.4 0.000668416 0.004944846 129896  
0.5 5.29272E-05 0.00721341 153317

0.4 0.352108809 1.92751E-05 124980  
0.5 0.236943752 6.85943E-05 147274

0.4 0.212025921 8.54777E-05 124976  
0.5 0.148203562 0.000145828 147246

0.4 0.017523243 0.000593954 124987  
0.5 0.009192934 0.000743105 147263

### PC 38:6

| thresh | pval        | r2          | nsnps  |
|--------|-------------|-------------|--------|
| 0.001  | 0.442188379 | 2.82839E-06 | 939    |
| 0.05   | 0.279589088 | 4.56228E-05 | 22479  |
| 0.1    | 0.244083085 | 6.42705E-05 | 40450  |
| 0.2    | 0.273184342 | 4.86631E-05 | 72180  |
| 0.3    | 0.217755434 | 8.13237E-05 | 99988  |
| 0.4    | 0.105617936 | 0.000209011 | 124961 |
| 0.5    | 0.088591141 | 0.000243531 | 147260 |

### PC 40:1

| thresh | pval        | r2          | nsnps  |
|--------|-------------|-------------|--------|
| 0.001  | 0.221765241 | 0.000121855 | 938    |
| 0.05   | 0.025235289 | 0.00079374  | 22246  |
| 0.1    | 0.043150482 | 0.000610451 | 39993  |
| 0.2    | 0.006049549 | 0.001305973 | 71377  |
| 0.3    | 0.006443383 | 0.001282819 | 98911  |
| 0.4    | 0.005284848 | 0.001355715 | 123605 |
| 0.5    | 0.004030817 | 0.001455919 | 145655 |

### PC 40:2

| thresh | pval        | r2          | nsnps  |
|--------|-------------|-------------|--------|
| 0.001  | 0.026257174 | 0.000502858 | 936    |
| 0.05   | 0.342355196 | 2.20591E-05 | 22479  |
| 0.1    | 0.355955555 | 1.82465E-05 | 40440  |
| 0.2    | 0.330684696 | 2.56706E-05 | 72194  |
| 0.3    | 0.206436478 | 8.97087E-05 | 100029 |
| 0.4    | 0.20074593  | 9.41692E-05 | 125031 |
| 0.5    | 0.179758563 | 0.000112327 | 147310 |

### PC 40:3

| thresh | pval        | r2          | nsnps  |
|--------|-------------|-------------|--------|
| 0.001  | 0.018471088 | 0.000582226 | 940    |
| 0.05   | 0.221990384 | 7.83984E-05 | 22485  |
| 0.1    | 0.09908487  | 0.000221518 | 40447  |
| 0.2    | 0.266713154 | 5.18933E-05 | 72177  |
| 0.3    | 0.230727125 | 7.25643E-05 | 100005 |
| 0.4    | 0.186448208 | 0.000106228 | 124989 |
| 0.5    | 0.207231004 | 8.91002E-05 | 147290 |

### PC 40:4

| thresh | pval        | r2          | nsnps  |
|--------|-------------|-------------|--------|
| 0.001  | 0.027404639 | 0.000493306 | 938    |
| 0.05   | 0.223648358 | 7.72639E-05 | 22491  |
| 0.1    | 0.243562037 | 6.46049E-05 | 40439  |
| 0.2    | 0.064391911 | 0.000308636 | 72154  |
| 0.3    | 0.060766892 | 0.00032072  | 99987  |
| 0.4    | 0.111649416 | 0.000198407 | 124984 |
| 0.5    | 0.045038224 | 0.000384326 | 147260 |

### PC 40:5

| thresh | pval        | r2          | nsnps  |
|--------|-------------|-------------|--------|
| 0.001  | 0.008382699 | 0.00076513  | 936    |
| 0.05   | 0.39913014  | 8.74106E-06 | 22486  |
| 0.1    | 0.172949222 | 0.000118865 | 40454  |
| 0.2    | 0.126959192 | 0.000174137 | 72174  |
| 0.3    | 0.118183409 | 0.000187584 | 100000 |
| 0.4    | 0.12174307  | 0.000181987 | 124945 |
| 0.5    | 0.06627966  | 0.00030264  | 147212 |

### PC 40:6

| thresh | pval        | r2          | nsnps  |
|--------|-------------|-------------|--------|
| 0.001  | 0.126095249 | 0.000175363 | 937    |
| 0.05   | 0.281523881 | 4.47361E-05 | 22488  |
| 0.1    | 0.458127452 | 1.479E-06   | 40452  |
| 0.2    | 0.419531353 | 5.51718E-06 | 72186  |
| 0.3    | 0.482924909 | 2.4519E-07  | 100004 |
| 0.4    | 0.308110226 | 3.36024E-05 | 124961 |
| 0.5    | 0.259710082 | 5.55154E-05 | 147255 |

### PC 42:0

| thresh | pval        | r2          | nsnps  |
|--------|-------------|-------------|--------|
| 0.001  | 0.136004429 | 0.000161339 | 939    |
| 0.05   | 0.023738455 | 0.000525191 | 22504  |
| 0.1    | 0.002934041 | 0.001014512 | 40444  |
| 0.2    | 0.008549817 | 0.000760091 | 72165  |
| 0.3    | 0.001871936 | 0.001123205 | 99990  |
| 0.4    | 0.001775535 | 0.001136049 | 124993 |
| 0.5    | 0.003925916 | 0.000944587 | 147269 |

### PC 42:1

| thresh | pval        | r2          | nsnps  |
|--------|-------------|-------------|--------|
| 0.001  | 0.083274969 | 0.000255881 | 939    |
| 0.05   | 0.057891366 | 0.00033071  | 22488  |
| 0.1    | 0.005166795 | 0.000879055 | 40434  |
| 0.2    | 0.052523963 | 0.00035126  | 72164  |
| 0.3    | 0.029998806 | 0.000472936 | 100004 |
| 0.4    | 0.012315075 | 0.000675047 | 124994 |
| 0.5    | 0.029833597 | 0.00047416  | 147286 |

### PC 42:2

| thresh | pval        | r2          | nsnps  |
|--------|-------------|-------------|--------|
| 0.001  | 0.124605648 | 0.000177629 | 940    |
| 0.05   | 0.20513634  | 9.07118E-05 | 22487  |
| 0.1    | 0.065360181 | 0.000305537 | 40431  |
| 0.2    | 0.186836317 | 0.000105883 | 72180  |
| 0.3    | 0.169527611 | 0.000122283 | 100000 |
| 0.4    | 0.190315211 | 0.00010284  | 125003 |
| 0.5    | 0.248335661 | 6.1818E-05  | 147280 |

### PC 42:4

| thresh | pval        | r2          | nsnps  |
|--------|-------------|-------------|--------|
| 0.001  | 0.070609414 | 0.000289424 | 940    |
| 0.05   | 0.215165066 | 8.31648E-05 | 22486  |
| 0.1    | 0.305584381 | 3.45643E-05 | 40445  |
| 0.2    | 0.103789583 | 0.000212364 | 72176  |
| 0.3    | 0.060148521 | 0.000322688 | 100006 |
| 0.4    | 0.054974268 | 0.000341605 | 124978 |
| 0.5    | 0.03171147  | 0.00046065  | 147253 |

### PC 42:5

| thresh | pval        | r2          | nsnps  |
|--------|-------------|-------------|--------|
| 0.001  | 0.079552039 | 0.000265212 | 939    |
| 0.05   | 0.074890463 | 0.000277484 | 22488  |
| 0.1    | 0.082212355 | 0.000258569 | 40428  |
| 0.2    | 0.146666509 | 0.000147716 | 72170  |
| 0.3    | 0.205697746 | 9.02654E-05 | 100012 |
| 0.4    | 0.229853893 | 7.31219E-05 | 124999 |
| 0.5    | 0.292600854 | 3.98521E-05 | 147281 |

### PC 42:6

| thresh | pval        | r2          | nsnps  |
|--------|-------------|-------------|--------|
| 0.001  | 0.208599346 | 9.97061E-05 | 935    |
| 0.05   | 0.050404302 | 0.00040784  | 22441  |
| 0.1    | 0.021231722 | 0.000623444 | 40347  |
| 0.2    | 0.048381478 | 0.000417744 | 71990  |
| 0.3    | 0.048004059 | 0.000419641 | 99742  |
| 0.4    | 0.052488144 | 0.000398083 | 124702 |
| 0.5    | 0.079351466 | 0.0003009   | 146936 |

## PC ae - Draisma et al., 2015

### PC 30:0

| thresh | pval        | r2          | nsnps  |
|--------|-------------|-------------|--------|
| 0.001  | 0.129656672 | 0.000192626 | 940    |
| 0.05   | 0.280827054 | 5.09977E-05 | 22455  |
| 0.1    | 0.113814191 | 0.000220357 | 40370  |
| 0.2    | 0.036232407 | 0.000488342 | 72035  |
| 0.3    | 0.01029508  | 0.000811352 | 99977  |
| 0.4    | 0.008809472 | 0.000852573 | 124740 |
| 0.5    | 0.019460602 | 0.000645409 | 147001 |

### PC 32:1

| thresh | pval        | r2          | nsnps  |
|--------|-------------|-------------|--------|
| 0.001  | 0.0127323   | 0.000667337 | 939    |
| 0.05   | 0.347041997 | 2.06871E-05 | 22484  |
| 0.1    | 0.101147887 | 0.000217377 | 40432  |
| 0.2    | 0.016160858 | 0.000612456 | 72159  |
| 0.3    | 0.001906695 | 0.001118738 | 99997  |
| 0.4    | 0.000737665 | 0.001350942 | 124979 |
| 0.5    | 0.001193129 | 0.001232968 | 147278 |

### PC 32:2

| thresh | pval        | r2          | nsnps  |
|--------|-------------|-------------|--------|
| 0.001  | 0.010422929 | 0.000713791 | 938    |
| 0.05   | 0.035362096 | 0.00043667  | 22496  |
| 0.1    | 0.001398094 | 0.001194246 | 40448  |
| 0.2    | 0.000191843 | 0.001684861 | 72182  |
| 0.3    | 1.65469E-05 | 0.002301613 | 100028 |
| 0.4    | 1.51522E-06 | 0.002910598 | 125007 |
| 0.5    | 2.68364E-06 | 0.002764497 | 147310 |

### PC 34:0

| thresh | pval        | r2          | nsnps  |
|--------|-------------|-------------|--------|
| 0.001  | 0.084497475 | 0.000252955 | 940    |
| 0.05   | 0.395162185 | 9.45398E-06 | 22497  |
| 0.1    | 0.468895561 | 8.14555E-07 | 40461  |
| 0.2    | 0.310773421 | 3.25883E-05 | 72196  |
| 0.3    | 0.183151328 | 0.000109137 | 100015 |
| 0.4    | 0.174498575 | 0.000117284 | 125023 |
| 0.5    | 0.28198759  | 4.4512E-05  | 147305 |

### PC 34:1

| thresh | pval        | r2          | nsnps |
|--------|-------------|-------------|-------|
| 0.001  | 0.19575563  | 9.81954E-05 | 940   |
| 0.05   | 0.215371716 | 8.30269E-05 | 22482 |

### PC 34:2

| thresh | pval        | r2          | nsnps |
|--------|-------------|-------------|-------|
| 0.001  | 0.159234358 | 0.000133078 | 941   |
| 0.05   | 0.214386155 | 8.37283E-05 | 22487 |

### PC 34:3

| thresh | pval        | r2          | nsnps |
|--------|-------------|-------------|-------|
| 0.001  | 0.113480743 | 0.000195194 | 939   |
| 0.05   | 0.491526479 | 6.03375E-08 | 22478 |

### PC 36:0

| thresh | pval        | r2          | nsnps |
|--------|-------------|-------------|-------|
| 0.001  | 0.179697994 | 0.000112354 | 939   |
| 0.05   | 0.002451386 | 0.001058155 | 22491 |

|     |             |             |        |     |             |             |        |     |             |             |        |     |             |             |        |
|-----|-------------|-------------|--------|-----|-------------|-------------|--------|-----|-------------|-------------|--------|-----|-------------|-------------|--------|
| 0.1 | 0.415158503 | 6.1418E-06  | 40435  | 0.1 | 0.330169402 | 2.58237E-05 | 40444  | 0.1 | 0.165605215 | 0.00012625  | 40451  | 0.1 | 0.014782848 | 0.000633075 | 40436  |
| 0.2 | 0.362179136 | 1.66315E-05 | 72186  | 0.2 | 0.214746775 | 8.3467E-05  | 72186  | 0.2 | 0.073945917 | 0.000279964 | 72197  | 0.2 | 0.007091621 | 0.000804277 | 72156  |
| 0.3 | 0.162980353 | 0.000129038 | 100008 | 0.3 | 0.142581532 | 0.000152745 | 100015 | 0.3 | 0.066869708 | 0.000300644 | 100021 | 0.3 | 0.014478003 | 0.000637869 | 99991  |
| 0.4 | 0.113062495 | 0.000195924 | 125013 | 0.4 | 0.12408917  | 0.000178311 | 125006 | 0.4 | 0.046068311 | 0.00037926  | 125010 | 0.4 | 0.010682503 | 0.000708252 | 124992 |
| 0.5 | 0.166537323 | 0.000125297 | 147303 | 0.5 | 0.172553026 | 0.000119192 | 147308 | 0.5 | 0.047989616 | 0.0003705   | 147302 | 0.5 | 0.005915993 | 0.000847136 | 147281 |

| PC 36:1 |             |             |        |  |
|---------|-------------|-------------|--------|--|
| thresh  | pval        | r2          | nsnps  |  |
| 0.001   | 0.043764357 | 0.000390354 | 939    |  |
| 0.05    | 0.101936358 | 0.000215894 | 22481  |  |
| 0.1     | 0.169052356 | 0.000122716 | 40431  |  |
| 0.2     | 0.2083581   | 8.82076E-05 | 72178  |  |
| 0.3     | 0.234953951 | 6.98374E-05 | 100017 |  |
| 0.4     | 0.334634058 | 2.44025E-05 | 125023 |  |
| 0.5     | 0.22077413  | 7.92072E-05 | 147308 |  |

| PC 36:2 |             |             |        |  |
|---------|-------------|-------------|--------|--|
| thresh  | pval        | r2          | nsnps  |  |
| 0.001   | 0.031533496 | 0.000461955 | 940    |  |
| 0.05    | 0.403693604 | 7.94935E-06 | 22491  |  |
| 0.1     | 0.283039613 | 4.4039E-05  | 40456  |  |
| 0.2     | 0.260320701 | 5.51841E-05 | 72185  |  |
| 0.3     | 0.160386348 | 0.000131835 | 100037 |  |
| 0.4     | 0.111176574 | 0.00019914  | 125034 |  |
| 0.5     | 0.208951304 | 8.77594E-05 | 147344 |  |

| PC 36:3 |             |             |        |  |
|---------|-------------|-------------|--------|--|
| thresh  | pval        | r2          | nsnps  |  |
| 0.001   | 0.314027787 | 3.13858E-05 | 940    |  |
| 0.05    | 0.038753942 | 0.000416656 | 22496  |  |
| 0.1     | 0.221524574 | 7.86774E-05 | 40459  |  |
| 0.2     | 0.23831326  | 6.77394E-05 | 72198  |  |
| 0.3     | 0.39205209  | 1.00377E-05 | 100043 |  |
| 0.4     | 0.396589165 | 9.19243E-06 | 125024 |  |
| 0.5     | 0.322461339 | 2.83978E-05 | 147328 |  |

| PC 36:4 |             |             |        |  |
|---------|-------------|-------------|--------|--|
| thresh  | pval        | r2          | nsnps  |  |
| 0.001   | 0.109425215 | 0.000202185 | 938    |  |
| 0.05    | 0.027393223 | 0.000493201 | 22491  |  |
| 0.1     | 0.232056795 | 7.1678E-05  | 40437  |  |
| 0.2     | 0.22924022  | 7.3503E-05  | 72188  |  |
| 0.3     | 0.274023764 | 4.8257E-05  | 100028 |  |
| 0.4     | 0.466389822 | 9.51532E-07 | 124987 |  |
| 0.5     | 0.367817916 | 1.52466E-05 | 147270 |  |

| PC 36:5 |             |             |        |  |
|---------|-------------|-------------|--------|--|
| thresh  | pval        | r2          | nsnps  |  |
| 0.001   | 0.076699771 | 0.000272584 | 940    |  |
| 0.05    | 0.280109177 | 4.53877E-05 | 22497  |  |
| 0.1     | 0.34560621  | 2.11041E-05 | 40458  |  |
| 0.2     | 0.246630653 | 6.27862E-05 | 72219  |  |
| 0.3     | 0.19025223  | 0.000102867 | 100049 |  |
| 0.4     | 0.087911671 | 0.000245098 | 125035 |  |
| 0.5     | 0.121280719 | 0.000182654 | 147317 |  |

| PC 38:0 |             |             |        |  |
|---------|-------------|-------------|--------|--|
| thresh  | pval        | r2          | nsnps  |  |
| 0.001   | 0.362065238 | 1.66624E-05 | 940    |  |
| 0.05    | 0.499117349 | 6.5477E-10  | 22491  |  |
| 0.1     | 0.374742394 | 1.36388E-05 | 40458  |  |
| 0.2     | 0.364601856 | 1.60304E-05 | 72201  |  |
| 0.3     | 0.405285767 | 7.68466E-06 | 100014 |  |
| 0.4     | 0.475856398 | 4.90507E-07 | 124991 |  |
| 0.5     | 0.414182612 | 6.28699E-06 | 147284 |  |

| PC 38:1 |             |             |        |  |
|---------|-------------|-------------|--------|--|
| thresh  | pval        | r2          | nsnps  |  |
| 0.001   | 0.167508329 | 0.000142145 | 940    |  |
| 0.05    | 0.000953602 | 0.001472877 | 22429  |  |
| 0.1     | 0.003410301 | 0.001118923 | 40328  |  |
| 0.2     | 7.9077E-05  | 0.002180634 | 72000  |  |
| 0.3     | 1.75135E-05 | 0.00261564  | 99770  |  |
| 0.4     | 1.59283E-05 | 0.002643135 | 124701 |  |
| 0.5     | 5.14217E-06 | 0.002971695 | 146937 |  |

| PC 38:2 |             |             |        |  |
|---------|-------------|-------------|--------|--|
| thresh  | pval        | r2          | nsnps  |  |
| 0.001   | 0.058205344 | 0.00032953  | 941    |  |
| 0.05    | 0.064807263 | 0.000307095 | 22496  |  |
| 0.1     | 0.075446746 | 0.000275827 | 40451  |  |
| 0.2     | 0.021200366 | 0.000550609 | 72195  |  |
| 0.3     | 0.04437854  | 0.000387246 | 100024 |  |
| 0.4     | 0.075256938 | 0.00027634  | 125020 |  |
| 0.5     | 0.035508672 | 0.000435705 | 147330 |  |

| PC 38:3 |             |             |        |  |
|---------|-------------|-------------|--------|--|
| thresh  | pval        | r2          | nsnps  |  |
| 0.001   | 0.00577929  | 0.000852566 | 939    |  |
| 0.05    | 0.133650808 | 0.000164563 | 22496  |  |
| 0.1     | 0.285482304 | 4.29403E-05 | 40453  |  |
| 0.2     | 0.147957606 | 0.000146106 | 72185  |  |
| 0.3     | 0.2532128   | 5.90387E-05 | 100007 |  |
| 0.4     | 0.326991792 | 2.68707E-05 | 125010 |  |
| 0.5     | 0.19900897  | 9.55292E-05 | 147303 |  |

| PC 38:4 |             |             |        |  |
|---------|-------------|-------------|--------|--|
| thresh  | pval        | r2          | nsnps  |  |
| 0.001   | 0.067854603 | 0.000297622 | 938    |  |
| 0.05    | 0.000551787 | 0.001422522 | 22486  |  |
| 0.1     | 0.004520208 | 0.000910901 | 40438  |  |
| 0.2     | 0.000615954 | 0.00139537  | 72161  |  |
| 0.3     | 0.000635615 | 0.001387621 | 100004 |  |
| 0.4     | 0.001902208 | 0.00111931  | 124988 |  |
| 0.5     | 0.000327062 | 0.001552054 | 147274 |  |

| PC 38:5 |              |             |        |  |
|---------|--------------|-------------|--------|--|
| thresh  | pval         | r2          | nsnps  |  |
| 0.001   | 0.232532778  | 7.13636E-05 | 940    |  |
| 0.05    | 0.0008741007 | 0.000754907 | 22482  |  |
| 0.1     | 0.093149235  | 0.000233544 | 40436  |  |
| 0.2     | 0.054461793  | 0.000343585 | 72169  |  |
| 0.3     | 0.07758377   | 0.000270183 | 100010 |  |
| 0.4     | 0.169525816  | 0.00012222  | 125002 |  |
| 0.5     | 0.128249847  | 0.000172164 | 147282 |  |

| PC 38:6 |             |             |        |  |
|---------|-------------|-------------|--------|--|
| thresh  | pval        | r2          | nsnps  |  |
| 0.001   | 0.447828909 | 2.30038E-06 | 939    |  |
| 0.05    | 0.122119376 | 0.000181334 | 22497  |  |
| 0.1     | 0.239840748 | 6.68143E-05 | 40454  |  |
| 0.2     | 0.322740725 | 2.83057E-05 | 72190  |  |
| 0.3     | 0.409793258 | 6.95718E-06 | 100026 |  |
| 0.4     | 0.418315636 | 5.68679E-06 | 125016 |  |
| 0.5     | 0.387019222 | 1.10237E-05 | 147324 |  |

| PC 40:1 |             |             |        |  |
|---------|-------------|-------------|--------|--|
| thresh  | pval        | r2          | nsnps  |  |
| 0.001   | 0.244868591 | 6.38075E-05 | 938    |  |
| 0.05    | 0.152903918 | 0.000140246 | 22481  |  |
| 0.1     | 0.356704266 | 1.80413E-05 | 40443  |  |
| 0.2     | 0.159130407 | 0.00013321  | 72189  |  |
| 0.3     | 0.136104329 | 0.000161226 | 100019 |  |
| 0.4     | 0.248268119 | 6.18319E-05 | 125014 |  |
| 0.5     | 0.187825731 | 0.000104968 | 147286 |  |

| PC 40:2 |              |             |        |  |
|---------|--------------|-------------|--------|--|
| thresh  | pval         | r2          | nsnps  |  |
| 0.001   | 0.021333769  | 0.000549264 | 941    |  |
| 0.05    | 0.438641961  | 3.18847E-06 | 22492  |  |
| 0.1     | 0.375177828  | 1.35373E-05 | 40437  |  |
| 0.2     | 0.493451562  | 3.60337E-08 | 72180  |  |
| 0.3     | 0.470141589  | 7.50481E-07 | 100021 |  |
| 0.4     | 0.4738847467 | 5.75499E-07 | 125035 |  |
| 0.5     | 0.397608397  | 9.00802E-06 | 147325 |  |

| PC 40:3 |             |             |        |  |
|---------|-------------|-------------|--------|--|
| thresh  | pval        | r2          | nsnps  |  |
| 0.001   | 0.008153214 | 0.000771236 | 940    |  |
| 0.05    | 0.145796083 | 0.000148726 | 22491  |  |
| 0.1     | 0.26747964  | 5.1478E-05  | 40448  |  |
| 0.2     | 0.103788687 | 0.000212366 | 72186  |  |
| 0.3     | 0.181116256 | 0.000111005 | 100018 |  |
| 0.4     | 0.216825408 | 8.19026E-05 | 125005 |  |
| 0.5     | 0.135010029 | 0.000162683 | 147298 |  |

| PC 40:4 |             |             |        |  |
|---------|-------------|-------------|--------|--|
| thresh  | pval        | r2          | nsnps  |  |
| 0.001   | 0.007161835 | 0.000801739 | 939    |  |
| 0.05    | 0.178522042 | 0.000113428 | 22487  |  |
| 0.1     | 0.443956495 | 2.65654E-06 | 40430  |  |
| 0.2     | 0.20698213  | 8.92427E-05 | 72160  |  |
| 0.3     | 0.292932159 | 3.96956E-05 | 99990  |  |
| 0.4     | 0.487041237 | 1.41148E-07 | 124975 |  |
| 0.5     | 0.276210128 | 4.72039E-05 | 147266 |  |

| PC 40:5 |             |             |        |  |
|---------|-------------|-------------|--------|--|
| thresh  | pval        | r2          | nsnps  |  |
| 0.001   | 0.048615507 | 0.000367729 | 940    |  |
| 0.05    | 0.310820364 | 3.25708E-05 | 22482  |  |
| 0.1     | 0.393545139 | 9.75512E-06 | 40451  |  |
| 0.2     | 0.35109454  | 1.95511E-05 | 72175  |  |
| 0.3     | 0.386227201 | 1.11817E-05 | 100022 |  |
| 0.4     | 0.497866766 | 3.82363E-09 | 124988 |  |
| 0.5     | 0.356719286 | 1.8035E-05  | 147295 |  |

| PC 40:6 |             |             |        |  |
|---------|-------------|-------------|--------|--|
| thresh  | pval        | r2          | nsnps  |  |
| 0.001   | 0.468498726 | 8.35516E-07 | 940    |  |
| 0.05    | 0.042559876 | 0.000396328 | 22489  |  |
| 0.1     | 0.019229025 | 0.000572803 | 40459  |  |
| 0.2     | 0.010144509 | 0.000720101 | 72184  |  |
| 0.3     | 0.008707414 | 0.000755809 | 100025 |  |
| 0.4     | 0.00441235  | 0.000916665 | 125017 |  |
| 0.5     | 0.001836759 | 0.001127812 | 147307 |  |

| PC 42:0 |             |             |        |  |
|---------|-------------|-------------|--------|--|
| thresh  | pval        | r2          | nsnps  |  |
| 0.001   | 0.271091478 | 5.6245E-05  | 941    |  |
| 0.05    | 0.14952671  | 0.000163259 | 22444  |  |
| 0.1     | 0.128798814 | 0.000194019 | 40336  |  |
| 0.2     | 0.283861614 | 4.94321E-05 | 71982  |  |
| 0.3     | 0.358942911 | 1.97617E-05 | 99746  |  |
| 0.4     | 0.408201301 | 8.1612E-06  | 124678 |  |
| 0.5     | 0.406506781 | 8.47101E-06 | 146936 |  |

| PC 42:1 |             |            |       |  |
|---------|-------------|------------|-------|--|
| thresh  | pval        | r2         | nsnps |  |
| 0.001   | 0.015357861 | 0.00062422 |       |  |

|      |             |             |        |      |             |             |        |      |             |             |        |      |             |             |        |
|------|-------------|-------------|--------|------|-------------|-------------|--------|------|-------------|-------------|--------|------|-------------|-------------|--------|
| 0.05 | 0.024981823 | 0.000513801 | 22490  | 0.05 | 0.160486801 | 0.000131708 | 22491  | 0.05 | 0.105983809 | 0.000208314 | 22487  | 0.05 | 0.08330131  | 0.000289625 | 22440  |
| 0.1  | 0.028812823 | 0.000481954 | 40450  | 0.1  | 0.051201187 | 0.000356679 | 40446  | 0.1  | 0.032017866 | 0.000458527 | 40450  | 0.1  | 0.056903935 | 0.00037851  | 40342  |
| 0.2  | 0.004707163 | 0.000901357 | 72191  | 0.2  | 0.118303673 | 0.000187291 | 72180  | 0.2  | 0.09020377  | 0.00023991  | 72175  | 0.2  | 0.104003793 | 0.000239977 | 72007  |
| 0.3  | 0.003951567 | 0.000943155 | 100034 | 0.3  | 0.14210286  | 0.000153354 | 100014 | 0.3  | 0.057108428 | 0.000333574 | 100018 | 0.3  | 0.043450458 | 0.000443636 | 99777  |
| 0.4  | 0.004266895 | 0.000924794 | 125033 | 0.4  | 0.145988193 | 0.000148489 | 124997 | 0.4  | 0.036475177 | 0.000429883 | 125009 | 0.4  | 0.030438975 | 0.000531774 | 124702 |
| 0.5  | 0.001173776 | 0.001237132 | 147332 | 0.5  | 0.218051074 | 8.11036E-05 | 147301 | 0.5  | 0.083108251 | 0.000256284 | 147301 | 0.5  | 0.074531427 | 0.000315138 | 146964 |

| PC 44:3 |             |             |        | PC 44:4 |             |             |        | PC 44:5 |             |             |        | PC 44:6 |             |             |        |
|---------|-------------|-------------|--------|---------|-------------|-------------|--------|---------|-------------|-------------|--------|---------|-------------|-------------|--------|
| thresh  | pval        | r2          | nsnps  | thresh  | pval        | r2          | nsnps  | thresh  | pval        | r2          | nsnps  | thresh  | pval        | r2          | nsnps  |
| 0.001   | 0.004708009 | 0.000901074 | 938    | 0.001   | 0.023002197 | 0.000532349 | 939    | 0.001   | 0.039057889 | 0.000414955 | 938    | 0.001   | 0.028306059 | 0.0004859   | 937    |
| 0.05    | 0.185310641 | 0.000107172 | 22489  | 0.05    | 0.261093619 | 5.4776E-05  | 22492  | 0.05    | 0.043957498 | 0.000389352 | 22489  | 0.05    | 0.001231382 | 0.001225416 | 22502  |
| 0.1     | 0.064820566 | 0.000307052 | 40447  | 0.1     | 0.141123267 | 0.000154628 | 40442  | 0.1     | 0.005706949 | 0.000855439 | 40435  | 0.1     | 9.73439E-05 | 0.001854861 | 40449  |
| 0.2     | 0.320406274 | 2.91052E-05 | 72176  | 0.2     | 0.200392642 | 9.44143E-05 | 72189  | 0.2     | 0.003720405 | 0.000957465 | 72169  | 0.2     | 6.15703E-05 | 0.001969967 | 72176  |
| 0.3     | 0.41006487  | 6.91277E-06 | 100009 | 0.3     | 0.139942794 | 0.000156153 | 100024 | 0.3     | 0.001073605 | 0.0012588   | 99990  | 0.3     | 1.94845E-05 | 0.002260508 | 100019 |
| 0.4     | 0.419280394 | 5.5499E-06  | 125013 | 0.4     | 0.146543217 | 0.000147828 | 125025 | 0.4     | 0.000706621 | 0.001361527 | 124973 | 0.4     | 8.186E-06   | 0.002480624 | 124993 |
| 0.5     | 0.465023602 | 1.03039E-06 | 147299 | 0.5     | 0.24089276  | 6.61766E-05 | 147314 | 0.5     | 0.002401964 | 0.001062796 | 147278 | 0.5     | 4.59926E-05 | 0.002043446 | 147289 |

LPC - Rhee et al., 2013 & Draisma et al., 2015

| LPC 14:0 |             |             |        | LPC 16:0 |             |              |        | LPC 16:1 |             |             |        | LPC 17:0 |             |             |        |
|----------|-------------|-------------|--------|----------|-------------|--------------|--------|----------|-------------|-------------|--------|----------|-------------|-------------|--------|
| thresh   | pval        | r2          | nsnps  | thresh   | pval        | r2           | nsnps  | thresh   | pval        | r2          | nsnps  | thresh   | pval        | r2          | nsnps  |
| 0.001    | 0.238769776 | 0.000242975 | 962    | 0.001    | 0.209914336 | 8.70241E-05  | 939    | 0.001    | 0.058624106 | 0.0003282   | 939    | 0.001    | 0.131898366 | 0.000166972 | 939    |
| 0.05     | 0.298334172 | 0.00013489  | 23182  | 0.05     | 0.000154265 | 0.001739309  | 22496  | 0.05     | 0.07353265  | 0.000281222 | 22485  | 0.05     | 3.43798E-06 | 0.002701271 | 22495  |
| 0.1      | 0.377287376 | 4.70735E-05 | 41762  | 0.1      | 1.11612E-05 | 0.002401515  | 40461  | 0.1      | 0.030601571 | 0.000468717 | 40442  | 0.1      | 1.10379E-07 | 0.003583062 | 40451  |
| 0.2      | 0.345801787 | 7.57943E-05 | 74775  | 0.2      | 3.99285E-06 | 0.002663108  | 72181  | 0.2      | 0.016601211 | 0.000606547 | 72181  | 0.2      | 1.02267E-09 | 0.004793237 | 72191  |
| 0.3      | 0.294427486 | 0.000140711 | 103797 | 0.3      | 8.81846E-07 | 0.003049188  | 100001 | 0.3      | 0.044878021 | 0.000385042 | 100015 | 0.3      | 3.76738E-10 | 0.005052321 | 100026 |
| 0.4      | 0.123373894 | 0.000646046 | 129896 | 0.4      | 1.43909E-06 | 0.0002923786 | 124994 | 0.4      | 0.068391732 | 0.000296114 | 124996 | 0.4      | 4.23729E-10 | 0.005021812 | 125019 |
| 0.5      | 0.166135468 | 0.000452704 | 153317 | 0.5      | 1.13586E-06 | 0.002984352  | 147288 | 0.5      | 0.062820748 | 0.000313736 | 147303 | 0.5      | 8.52107E-11 | 0.005438406 | 147292 |

| LPC 18:0 |             |             |        | LPC 18:1 |             |             |        | LPC 18:2 |             |             |        | LPC 20:3 |             |             |        |
|----------|-------------|-------------|--------|----------|-------------|-------------|--------|----------|-------------|-------------|--------|----------|-------------|-------------|--------|
| thresh   | pval        | r2          | nsnps  | thresh   | pval        | r2          | nsnps  | thresh   | pval        | r2          | nsnps  | thresh   | pval        | r2          | nsnps  |
| 0.001    | 0.460783516 | 1.29638E-06 | 939    | 0.001    | 0.050135525 | 0.000361206 | 940    | 0.001    | 0.32773726  | 2.66272E-05 | 938    | 0.001    | 0.189335796 | 0.000103633 | 938    |
| 0.05     | 1.81113E-08 | 0.004049261 | 22486  | 0.05     | 0.013953051 | 0.000646288 | 22511  | 0.05     | 0.209268318 | 8.75324E-05 | 22490  | 0.05     | 0.01291935  | 0.000663965 | 22492  |
| 0.1      | 1.92021E-12 | 0.006425419 | 40452  | 0.1      | 0.003725792 | 0.000957246 | 40475  | 0.1      | 0.155146928 | 0.000937688 | 40453  | 0.1      | 0.001148713 | 0.001242247 | 40460  |
| 0.2      | 8.99712E-17 | 0.009027076 | 72184  | 0.2      | 0.001686825 | 0.001148664 | 72213  | 0.2      | 0.070118506 | 0.000290936 | 72197  | 0.2      | 0.000105782 | 0.001833765 | 72185  |
| 0.3      | 5.83191E-18 | 0.009742117 | 100026 | 0.3      | 0.001409808 | 0.00119237  | 100056 | 0.3      | 0.085545571 | 0.000250551 | 100016 | 0.3      | 0.000390751 | 0.00150791  | 100018 |
| 0.4      | 1.5903E-18  | 0.010081759 | 124995 | 0.4      | 0.004805256 | 0.000896442 | 125044 | 0.4      | 0.116862404 | 0.000189662 | 125015 | 0.4      | 0.000377057 | 0.001516754 | 125010 |
| 0.5      | 1.94595E-19 | 0.010630906 | 147278 | 0.5      | 0.005286943 | 0.000873707 | 147338 | 0.5      | 0.100111483 | 0.000219445 | 147266 | 0.5      | 0.0001577   | 0.001733806 | 147289 |

| LPC 20:4 |             |             |        | LPC 20:5 PC1 |             |             |        | LPC 22:6 PC1 |             |             |        | LPC 28:0 |             |             |        |
|----------|-------------|-------------|--------|--------------|-------------|-------------|--------|--------------|-------------|-------------|--------|----------|-------------|-------------|--------|
| thresh   | pval        | r2          | nsnps  | thresh       | pval        | r2          | nsnps  | thresh       | pval        | r2          | nsnps  | thresh   | pval        | r2          | nsnps  |
| 0.001    | 0.484784939 | 1.9463E-07  | 940    | 0.001        | 0.026263996 | 0.001808994 | 962    | 0.001        | 0.158878958 | 0.00048069  | 962    | 0.001    | 0.284390737 | 4.91847E-05 | 938    |
| 0.05     | 0.006705375 | 0.000817387 | 22500  | 0.05         | 5.12351E-05 | 0.007242739 | 23182  | 0.05         | 0.00423375  | 0.003333463 | 23182  | 0.05     | 0.155309808 | 0.000155704 | 22447  |
| 0.1      | 0.009919983 | 0.000725418 | 40459  | 0.1          | 0.00035468  | 0.005507207 | 41762  | 0.1          | 0.048326772 | 0.001328554 | 41762  | 0.1      | 0.357885208 | 2.00818E-05 | 40357  |
| 0.2      | 0.002206153 | 0.001083515 | 72186  | 0.2          | 0.003528086 | 0.003490337 | 74775  | 0.2          | 0.060768252 | 0.001154154 | 74775  | 0.2      | 0.366858429 | 1.75288E-05 | 72004  |
| 0.3      | 0.000961398 | 0.001286027 | 100008 | 0.3          | 0.000292919 | 0.005677678 | 103797 | 0.3          | 0.018034339 | 0.002114262 | 103797 | 0.3      | 0.272680529 | 5.53898E-05 | 99772  |
| 0.4      | 0.004911593 | 0.000891228 | 124992 | 0.4          | 0.000618215 | 0.005013928 | 129896 | 0.4          | 0.014687082 | 0.00222833  | 129896 | 0.4      | 0.287797913 | 4.74707E-05 | 124724 |
| 0.5      | 0.003458232 | 0.000975121 | 147256 | 0.5          | 0.000757788 | 0.004833935 | 153317 | 0.5          | 0.036149374 | 0.001554688 | 153317 | 0.5      | 0.344314931 | 2.43215E-05 | 146989 |

| LPC 28:1 |             |             |        | LPC 20:2 |             |             |        |
|----------|-------------|-------------|--------|----------|-------------|-------------|--------|
| thresh   | pval        | r2          | nsnps  | thresh   | pval        | r2          | nsnps  |
| 0.001    | 0.005282401 | 0.000873911 | 938    | 0.001    | 0.026897004 | 0.000571475 | 868    |
| 0.05     | 0.414346795 | 6.26174E-06 | 22493  | 0.05     | 0.058379873 | 0.00037808  | 20363  |
| 0.1      | 0.292948028 | 3.96942E-05 | 40451  | 0.1      | 0.020539028 | 0.00064117  | 36488  |
| 0.2      | 0.385095483 | 1.14132E-05 | 72179  | 0.2      | 0.017538695 | 0.00068243  | 64867  |
| 0.3      | 0.460550498 | 1.31206E-06 | 100018 | 0.3      | 0.030706813 | 0.000537635 | 89563  |
| 0.4      | 0.419062232 | 5.58186E-06 | 125018 | 0.4      | 0.04057416  | 0.000467421 | 111600 |
| 0.5      | 0.460734319 | 1.29982E-06 | 147309 | 0.5      | 0.047192241 | 0.000429966 | 131229 |

LPE - Rhee et al., 2013 & Shin et al., 2014

| LPE 16:0 |             |             |        |  | LPE 18:0 |             |             |        |  | LPE 18:1 |             |             |        |  | LPE 18:2 |             |              |        |  |
|----------|-------------|-------------|--------|--|----------|-------------|-------------|--------|--|----------|-------------|-------------|--------|--|----------|-------------|--------------|--------|--|
| thresh   | pval        | r2          | nsnps  |  | thresh   | pval        | r2          | nsnps  |  | thresh   | pval        | r2          | nsnps  |  | thresh   | pval        | r2           | nsnps  |  |
| 0.001    | 0.318469114 | 0.000107301 | 962    |  | 0.001    | 0.34818905  | 7.33437E-05 | 962    |  | 0.001    | 0.420374023 | 1.94485E-05 | 962    |  | 0.001    | 0.02067162  | 0.002002756  | 962    |  |
| 0.05     | 0.025640249 | 0.001828331 | 23182  |  | 0.05     | 0.028872179 | 0.001733089 | 23182  |  | 0.05     | 0.189151606 | 0.000373826 | 23182  |  | 0.05     | 0.002071589 | 0.003951697  | 23182  |  |
| 0.1      | 0.016456319 | 0.002189468 | 41762  |  | 0.1      | 0.035248905 | 0.001574574 | 41762  |  | 0.1      | 0.304058052 | 0.000126643 | 41762  |  | 0.1      | 7.25065E-05 | 0.006929578  | 41762  |  |
| 0.2      | 0.001366068 | 0.00431544  | 74775  |  | 0.2      | 0.004596576 | 0.003262927 | 74775  |  | 0.2      | 0.168099688 | 0.000445407 | 74775  |  | 0.2      | 0.003132216 | 0.003593057  | 74775  |  |
| 0.3      | 0.000656813 | 0.004960336 | 103797 |  | 0.3      | 0.003639814 | 0.00346347  | 103797 |  | 0.3      | 0.176996963 | 0.000413733 | 103797 |  | 0.3      | 0.001839892 | 0.004055069  | 103797 |  |
| 0.4      | 0.00227535  | 0.003870077 | 129896 |  | 0.4      | 0.00710516  | 0.002891681 | 129896 |  | 0.4      | 0.261838627 | 0.00019586  | 129896 |  | 0.4      | 0.001888796 | 0.0004032189 | 129896 |  |
| 0.5      | 0.001459737 | 0.004257349 | 153317 |  | 0.5      | 0.007224315 | 0.002877588 | 153317 |  | 0.5      | 0.224275131 | 0.000276606 | 153317 |  | 0.5      | 0.003730572 | 0.003442258  | 153317 |  |

  

| LPE 20:4 |             |             |        |  | LPE 22:6 |             |             |        |  |
|----------|-------------|-------------|--------|--|----------|-------------|-------------|--------|--|
| thresh   | pval        | r2          | nsnps  |  | thresh   | pval        | r2          | nsnps  |  |
| 0.001    | 0.325739908 | 9.82801E-05 | 962    |  | 0.001    | 0.207332598 | 0.000320462 | 962    |  |
| 0.05     | 0.165982038 | 0.000453279 | 23182  |  | 0.05     | 0.000725498 | 0.004872403 | 23182  |  |
| 0.1      | 0.275718352 | 0.000170867 | 41762  |  | 0.1      | 0.002096041 | 0.003941481 | 41762  |  |
| 0.2      | 0.135631966 | 0.000582848 | 74775  |  | 0.2      | 0.000308722 | 0.005630829 | 74775  |  |
| 0.3      | 0.0615851   | 0.001144113 | 103797 |  | 0.3      | 4.12636E-05 | 0.007438238 | 103797 |  |
| 0.4      | 0.092661431 | 0.000844736 | 129896 |  | 0.4      | 8.39534E-05 | 0.006797576 | 129896 |  |
| 0.5      | 0.093683114 | 0.000836936 | 153317 |  | 0.5      | 2.61986E-05 | 0.007849254 | 153317 |  |

LPI - Shin et al., 2014

| LPI 16:0 |             |             |        |  | LPI 18:0 |             |             |        |  | LPI 20:4 |             |             |        |  |
|----------|-------------|-------------|--------|--|----------|-------------|-------------|--------|--|----------|-------------|-------------|--------|--|
| thresh   | pval        | r2          | nsnps  |  | thresh   | pval        | r2          | nsnps  |  | thresh   | pval        | r2          | nsnps  |  |
| 0.001    | 0.100191696 | 0.000274185 | 867    |  | 0.001    | 0.18606102  | 0.00010985  | 869    |  | 0.001    | 0.276993544 | 4.76E-05    | 868    |  |
| 0.05     | 0.327288798 | 3.35E-05    | 20365  |  | 0.05     | 0.319790112 | 3.02E-05    | 20368  |  | 0.05     | 0.225849143 | 7.70E-05    | 20370  |  |
| 0.1      | 0.176728202 | 0.000143995 | 36484  |  | 0.1      | 0.062248124 | 0.000325395 | 36488  |  | 0.1      | 0.190342257 | 0.000104537 | 36492  |  |
| 0.2      | 0.090787696 | 0.000298447 | 64861  |  | 0.2      | 0.030429795 | 0.000484478 | 64867  |  | 0.2      | 0.466033748 | 9.89E-07    | 64867  |  |
| 0.3      | 0.114877115 | 0.000241212 | 89586  |  | 0.3      | 0.027792679 | 0.000505242 | 89587  |  | 0.3      | 0.393949365 | 9.85E-06    | 89558  |  |
| 0.4      | 0.113075661 | 0.000244978 | 111594 |  | 0.4      | 0.048631813 | 0.000379165 | 111588 |  | 0.4      | 0.473830833 | 5.86E-07    | 111582 |  |
| 0.5      | 0.163604835 | 0.000160534 | 131228 |  | 0.5      | 0.094384145 | 0.000238174 | 131215 |  | 0.5      | 0.4296167   | 4.28E-06    | 131209 |  |

Inositol metabolism - Shin et al., 2014

| Chiro-inositol |             |             |        |  | myo-inositol |             |             |        |  | scyllo-inositol |             |             |        |  |
|----------------|-------------|-------------|--------|--|--------------|-------------|-------------|--------|--|-----------------|-------------|-------------|--------|--|
| thresh         | pval        | r2          | nsnps  |  | thresh       | pval        | r2          | nsnps  |  | thresh          | pval        | r2          | nsnps  |  |
| 0.001          | 0.019721163 | 0.001655548 | 868    |  | 0.001        | 0.000378464 | 0.00154137  | 868    |  | 0.001           | 0.02383148  | 0.000640721 | 868    |  |
| 0.05           | 0.350257404 | 5.78E-05    | 20351  |  | 0.05         | 0.087608676 | 0.000249864 | 20368  |  | 0.05            | 0.048613068 | 0.000449395 | 20367  |  |
| 0.1            | 0.186758993 | 0.000309299 | 36460  |  | 0.1          | 0.116720536 | 0.000193042 | 36490  |  | 0.1             | 0.038511045 | 0.000510843 | 36491  |  |
| 0.2            | 0.098767566 | 0.000648425 | 64825  |  | 0.2          | 0.382319159 | 1.22E-05    | 64866  |  | 0.2             | 0.141315768 | 0.000188639 | 64866  |  |
| 0.3            | 0.091168939 | 0.000694472 | 89508  |  | 0.3          | 0.452661761 | 1.92E-06    | 89586  |  | 0.3             | 0.046482461 | 0.000461124 | 89595  |  |
| 0.4            | 0.025761242 | 0.001479844 | 111521 |  | 0.4          | 0.402711422 | 8.25E-06    | 111586 |  | 0.4             | 0.029724448 | 0.000580432 | 111597 |  |
| 0.5            | 0.014034199 | 0.001882547 | 131127 |  | 0.5          | 0.430438528 | 4.18E-06    | 131210 |  | 0.5             | 0.080958653 | 0.000319646 | 131214 |  |

**Sphingomyelin (SM) - Rhee et al., 2013 & Draisma et al., 2015 & Shin et al., 2014**

| SM 14:0 |             |             |        |  | SM 18:1 |             |             |        |  | SM 20:2 |             |             |        |  | SM 22:0 |             |             |        |  |
|---------|-------------|-------------|--------|--|---------|-------------|-------------|--------|--|---------|-------------|-------------|--------|--|---------|-------------|-------------|--------|--|
| thresh  | pval        | r2          | nsnps  |  | thresh  | pval        | r2          | nsnps  |  | thresh  | pval        | r2          | nsnps  |  | thresh  | pval        | r2          | nsnps  |  |
| 0.001   | 0.432983553 | 1.37224E-05 | 962    |  | 0.001   | 0.001222    | 0.001226958 | 939    |  | 0.001   | 0.11243309  | 0.000196938 | 938    |  | 0.001   | 0.09035357  | 0.000862729 | 962    |  |
| 0.05    | 0.351863943 | 6.96617E-05 | 23182  |  | 0.05    | 0.034565367 | 0.000441611 | 22500  |  | 0.05    | 0.014357268 | 0.00063954  | 22495  |  | 0.05    | 0.257350653 | 0.000204458 | 23182  |  |
| 0.1     | 0.166983902 | 0.000449538 | 41762  |  | 0.1     | 0.153153028 | 0.00013992  | 40457  |  | 0.1     | 0.121852539 | 0.000181697 | 40444  |  | 0.1     | 0.211183374 | 0.000310029 | 41762  |  |
| 0.2     | 0.100781943 | 0.00078534  | 74775  |  | 0.2     | 0.102230353 | 0.000215276 | 72185  |  | 0.2     | 0.056411003 | 0.000336117 | 72185  |  | 0.2     | 0.278050981 | 0.000166893 | 74775  |  |
| 0.3     | 0.022839003 | 0.001921768 | 103797 |  | 0.3     | 0.149801045 | 0.000143854 | 99984  |  | 0.3     | 0.122477335 | 0.000180737 | 100006 |  | 0.3     | 0.393627839 | 3.50827E-05 | 103797 |  |
| 0.4     | 0.008165558 | 0.00277402  | 129896 |  | 0.4     | 0.140144999 | 0.000155849 | 124963 |  | 0.4     | 0.098746275 | 0.00022204  | 124988 |  | 0.4     | 0.365951038 | 5.65361E-05 | 129896 |  |
| 0.5     | 0.018999245 | 0.002071594 | 153317 |  | 0.5     | 0.109380768 | 0.000202209 | 147254 |  | 0.5     | 0.075188649 | 0.000276525 | 147263 |  | 0.5     | 0.424743802 | 1.73474E-05 | 153317 |  |
| SM 22:1 |             |             |        |  | SM 24:0 |             |             |        |  | SM 24:1 |             |             |        |  | SM 26:0 |             |             |        |  |
| thresh  | pval        | r2          | nsnps  |  | thresh  | pval        | r2          | nsnps  |  | thresh  | pval        | r2          | nsnps  |  | thresh  | pval        | r2          | nsnps  |  |
| 0.001   | 0.389907591 | 3.76456E-05 | 962    |  | 0.001   | 0.03347998  | 0.000448744 | 939    |  | 0.001   | 0.057353712 | 0.000332672 | 940    |  | 0.001   | 0.088693822 | 0.000276925 | 939    |  |
| 0.05    | 0.035108613 | 0.001577721 | 23182  |  | 0.05    | 0.001680486 | 0.00114958  | 22493  |  | 0.05    | 0.024773817 | 0.000515607 | 22493  |  | 0.05    | 1.60483E-13 | 0.008047144 | 22422  |  |
| 0.1     | 0.109239567 | 0.000729181 | 41762  |  | 0.1     | 0.000548241 | 0.001424305 | 40454  |  | 0.1     | 0.030681954 | 0.000467948 | 40446  |  | 0.1     | 1.2454E-18  | 0.011541457 | 40286  |  |
| 0.2     | 0.127173473 | 0.000625656 | 74775  |  | 0.2     | 0.00038748  | 0.001510196 | 72171  |  | 0.2     | 0.012264873 | 0.000675993 | 72169  |  | 0.2     | 5.00895E-24 | 0.015232308 | 71913  |  |
| 0.3     | 0.118747924 | 0.000671931 | 103797 |  | 0.3     | 0.001051488 | 0.001264068 | 100008 |  | 0.3     | 0.034863424 | 0.000439785 | 100001 |  | 0.3     | 4.77686E-24 | 0.015246396 | 99606  |  |
| 0.4     | 0.136760952 | 0.000577386 | 129896 |  | 0.4     | 0.000428861 | 0.00148505  | 124992 |  | 0.4     | 0.021370494 | 0.000548875 | 124966 |  | 0.4     | 3.22416E-26 | 0.016730074 | 124475 |  |
| 0.5     | 0.12467169  | 0.000638996 | 153317 |  | 0.5     | 0.000174927 | 0.001708131 | 147285 |  | 0.5     | 0.016336305 | 0.000609984 | 147263 |  | 0.5     | 4.20762E-27 | 0.017334241 | 146709 |  |
| SM 26:1 |             |             |        |  | SM 16:0 |             |             |        |  |         |             |             |        |  |         |             |             |        |  |
| thresh  | pval        | r2          | nsnps  |  | thresh  | pval        | r2          | nsnps  |  |         |             |             |        |  |         |             |             |        |  |
| 0.001   | 0.473919366 | 5.72718E-07 | 940    |  | 0.001   | 0.026532759 | 0.000507861 | 868    |  |         |             |             |        |  |         |             |             |        |  |
| 0.05    | 0.000267835 | 0.001602783 | 22495  |  | 0.05    | 0.151148178 | 0.000144442 | 20369  |  |         |             |             |        |  |         |             |             |        |  |
| 0.1     | 0.000292983 | 0.001580449 | 40428  |  | 0.1     | 0.303373976 | 3.60E-05    | 36491  |  |         |             |             |        |  |         |             |             |        |  |
| 0.2     | 0.000145529 | 0.001755059 | 72128  |  | 0.2     | 0.161667977 | 0.000132411 | 64866  |  |         |             |             |        |  |         |             |             |        |  |
| 0.3     | 7.43965E-05 | 0.001923401 | 99959  |  | 0.3     | 0.169263736 | 0.000124347 | 89588  |  |         |             |             |        |  |         |             |             |        |  |
| 0.4     | 5.31703E-06 | 0.002591845 | 124904 |  | 0.4     | 0.23415721  | 7.14E-05    | 111585 |  |         |             |             |        |  |         |             |             |        |  |
| 0.5     | 9.73696E-06 | 0.002437819 | 147157 |  | 0.5     | 0.337769606 | 2.38E-05    | 131216 |  |         |             |             |        |  |         |             |             |        |  |

**Cholesterol ester (CE) - Rhee et al., 2013**

| CE 14:0 |             |             |        |  | CE 16:0 |             |             |        |  | CE 16:1:PC1 |             |             |        |  | CE 18:0 |             |             |        |  |
|---------|-------------|-------------|--------|--|---------|-------------|-------------|--------|--|-------------|-------------|-------------|--------|--|---------|-------------|-------------|--------|--|
| thresh  | pval        | r2          | nsnps  |  | thresh  | pval        | r2          | nsnps  |  | thresh      | pval        | r2          | nsnps  |  | thresh  | pval        | r2          | nsnps  |  |
| 0.001   | 0.223387481 | 0.000278776 | 962    |  | 0.001   | 0.281264835 | 0.00016152  | 962    |  | 0.001       | 0.365590873 | 5.68526E-05 | 962    |  | 0.001   | 0.180442398 | 0.000402044 | 962    |  |
| 0.05    | 0.039426313 | 0.001486559 | 23182  |  | 0.05    | 0.007241882 | 0.002875531 | 23182  |  | 0.05        | 0.125219075 | 0.000636049 | 23182  |  | 0.05    | 0.083973039 | 0.000915372 | 23182  |  |
| 0.1     | 0.003393776 | 0.003523808 | 41762  |  | 0.1     | 0.000721444 | 0.004877353 | 41762  |  | 0.1         | 0.044275678 | 0.001396189 | 41762  |  | 0.1     | 0.05788709  | 0.001190802 | 41762  |  |
| 0.2     | 0.002616864 | 0.003748666 | 74775  |  | 0.2     | 0.001532805 | 0.004214601 | 74775  |  | 0.2         | 0.019595453 | 0.002046349 | 74775  |  | 0.2     | 0.016594677 | 0.002182578 | 74775  |  |
| 0.3     | 0.001636168 | 0.004157538 | 103797 |  | 0.3     | 0.00123457  | 0.004040204 | 103797 |  | 0.3         | 0.023384569 | 0.001902655 | 103797 |  | 0.3     | 0.010697756 | 0.002546985 | 103797 |  |
| 0.4     | 0.001437732 | 0.004270648 | 129896 |  | 0.4     | 0.001174006 | 0.004448365 | 129896 |  | 0.4         | 0.026668558 | 0.00179671  | 129896 |  | 0.4     | 0.008767713 | 0.002714026 | 129896 |  |
| 0.5     | 0.004339532 | 0.003312279 | 153317 |  | 0.5     | 0.001331904 | 0.00433764  | 153317 |  | 0.5         | 0.036459084 | 0.001547971 | 153317 |  | 0.5     | 0.005819204 | 0.003061363 | 153317 |  |

  

| CE 18:1 |             |             |        |  | CE 18:2 |             |             |        |  | CE 18:3 |             |             |        |  | CE 20:3 |             |             |        |  |
|---------|-------------|-------------|--------|--|---------|-------------|-------------|--------|--|---------|-------------|-------------|--------|--|---------|-------------|-------------|--------|--|
| thresh  | pval        | r2          | nsnps  |  | thresh  | pval        | r2          | nsnps  |  | thresh  | pval        | r2          | nsnps  |  | thresh  | pval        | r2          | nsnps  |  |
| 0.001   | 0.475189755 | 1.86541E-06 | 962    |  | 0.001   | 0.449094793 | 7.88574E-06 | 962    |  | 0.001   | 0.491652318 | 2.10935E-07 | 962    |  | 0.001   | 0.192160647 | 0.000364497 | 962    |  |
| 0.05    | 0.150511834 | 0.000515115 | 23182  |  | 0.05    | 0.136470302 | 0.000578786 | 23182  |  | 0.05    | 0.017814903 | 0.002124299 | 23182  |  | 0.05    | 0.144763184 | 0.000540231 | 23182  |  |
| 0.1     | 0.023598717 | 0.001895281 | 41762  |  | 0.1     | 0.009286933 | 0.002665611 | 41762  |  | 0.1     | 0.005239697 | 0.003150869 | 41762  |  | 0.1     | 0.00927865  | 0.000803035 | 41762  |  |
| 0.2     | 0.019183913 | 0.002063687 | 74775  |  | 0.2     | 0.019148484 | 0.002065198 | 74775  |  | 0.2     | 0.009555853 | 0.002641623 | 74775  |  | 0.2     | 0.250068714 | 0.000218976 | 74775  |  |
| 0.3     | 0.021257534 | 0.001980012 | 103797 |  | 0.3     | 0.021791738 | 0.001959843 | 103797 |  | 0.3     | 0.006539457 | 0.00296208  | 103797 |  | 0.3     | 0.271482422 | 0.000178246 | 103797 |  |
| 0.4     | 0.012844076 | 0.002394474 | 129896 |  | 0.4     | 0.015617823 | 0.002232555 | 129896 |  | 0.4     | 0.007682178 | 0.002825576 | 129896 |  | 0.4     | 0.228292029 | 0.000266947 | 129896 |  |
| 0.5     | 0.014957597 | 0.002268213 | 153317 |  | 0.5     | 0.021692409 | 0.001963553 | 153317 |  | 0.5     | 0.004000309 | 0.003382194 | 153317 |  | 0.5     | 0.183820482 | 0.000390879 | 153317 |  |

  

| CE 20:4 |             |             |        |  | CE 20:5 |             |             |        |  | CE 22:6 |             |             |        |  |
|---------|-------------|-------------|--------|--|---------|-------------|-------------|--------|--|---------|-------------|-------------|--------|--|
| thresh  | pval        | r2          | nsnps  |  | thresh  | pval        | r2          | nsnps  |  | thresh  | pval        | r2          | nsnps  |  |
| 0.001   | 0.259835378 | 0.000199665 | 962    |  | 0.001   | 0.161387498 | 0.000470828 | 962    |  | 0.001   | 0.227766444 | 0.000268195 | 962    |  |
| 0.05    | 0.382199598 | 4.32676E-05 | 23182  |  | 0.05    | 9.72727E-05 | 0.006665091 | 23182  |  | 0.05    | 0.003396568 | 0.003523099 | 23182  |  |
| 0.1     | 0.169837299 | 0.000439046 | 41762  |  | 0.1     | 4.16873E-06 | 0.009520326 | 41762  |  | 0.1     | 0.000573032 | 0.009508114 | 41762  |  |
| 0.2     | 0.382711594 | 4.2881E-05  | 74775  |  | 0.2     | 4.39339E-06 | 0.009472457 | 74775  |  | 0.2     | 0.000257544 | 0.00579252  | 74775  |  |
| 0.3     | 0.198398946 | 0.000345802 | 103797 |  | 0.3     | 1.15604E-06 | 0.010692201 | 103797 |  | 0.3     | 9.95219E-05 | 0.006644537 | 103797 |  |
| 0.4     | 0.191709565 | 0.000365882 | 129896 |  | 0.4     | 1.04726E-06 | 0.010782643 | 129896 |  | 0.4     | 2.25241E-05 | 0.007986184 | 129896 |  |
| 0.5     | 0.226386243 | 0.000271496 | 153317 |  | 0.5     | 8.10168E-07 | 0.01101767  | 153317 |  | 0.5     | 2.61413E-05 | 0.007851237 | 153317 |  |

**Cholesterol - Kettunen et al., 2016**

| Free.C |             |             |        |  | Serum.C |             |             |        |  | Est.C  |             |             |        |  |
|--------|-------------|-------------|--------|--|---------|-------------|-------------|--------|--|--------|-------------|-------------|--------|--|
| thresh | pval        | r2          | nsnps  |  | thresh  | pval        | r2          | nsnps  |  | thresh | pval        | r2          | nsnps  |  |
| 0.001  | 0.169768834 | 6.75813E-05 | 1410   |  | 0.001   | 0.063589084 | 0.000108254 | 1412   |  | 0.001  | 0.314385601 | 1.73171E-05 | 1410   |  |
| 0.05   | 0.343323773 | 1.20573E-05 | 34880  |  | 0.05    | 0.490747688 | 2.50324E-08 | 35080  |  | 0.05   | 0.375939233 | 7.40601E-06 | 34881  |  |
| 0.1    | 0.485175096 | 1.02359E-07 | 62715  |  | 0.1     | 0.332325622 | 8.74421E-06 | 63079  |  | 0.1    | 0.326632517 | 1.4952E-05  | 62717  |  |
| 0.2    | 0.24075301  | 3.67075E-05 | 111433 |  | 0.2     | 0.311499167 | 1.12454E-05 | 112104 |  | 0.2    | 0.391845934 | 5.58318E-06 | 111438 |  |
| 0.3    | 0.122455956 | 0.000100173 | 154446 |  | 0.3     | 0.272040206 | 1.71247E-05 | 155481 |  | 0.3    | 0.489958738 | 4.69473E-08 | 154454 |  |
| 0.4    | 0.095776142 | 0.000126364 | 192519 |  | 0.4     | 0.332391067 | 8.73694E-06 | 193845 |  | 0.4    | 0.419520488 | 3.05681E-06 | 192530 |  |
| 0.5    | 0.055001812 | 0.000189222 | 226752 |  | 0.5     | 0.392714117 | 1.28359E-05 | 228329 |  | 0.5    | 0.392278311 | 5.5375E-06  | 226767 |  |

**Other - Shin et al., 2014**

| 4-androsten-3beta,17beta-diol disulfate 1* |             |             |        |  | 4-androsten-3beta,17beta-diol disulfate 2* |             |             |        |  | 5alpha-androstan-3beta,17beta-diol disulfate |             |             |        |  | 7-alpha-hydroxy-3-oxo-4-cholestenoate (7-Hoca) |             |             |        |  |
|--------------------------------------------|-------------|-------------|--------|--|--------------------------------------------|-------------|-------------|--------|--|----------------------------------------------|-------------|-------------|--------|--|------------------------------------------------|-------------|-------------|--------|--|
| thresh                                     | pval        | r2          | nsnps  |  | thresh                                     | pval        | r2          | nsnps  |  | thresh                                       | pval        | r2          | nsnps  |  | thresh                                         | pval        | r2          | nsnps  |  |
| 0.001                                      | 0.245504088 | 6.45E-05    | 868    |  | 0.001                                      | 0.36685849  | 1.58E-05    | 868    |  | 0.001                                        | 0.110972093 | 0.000215113 | 868    |  | 0.001                                          | 0.066849109 | 0.000306569 | 868    |  |
| 0.05                                       | 4.89E-05    | 0.002061748 | 20370  |  | 0.05                                       | 0.000794553 | 0.001359    | 20370  |  | 0.05                                         | 0.002273345 | 0.001160483 | 20371  |  | 0.05                                           | 0.129719974 | 0.000173365 | 20370  |  |
| 0.1                                        | 3.20E-06    | 0.002765019 | 36492  |  | 0.1                                        | 0.006252219 | 0.0008503   | 36492  |  | 0.1                                          | 0.000165763 | 0.001856265 | 36492  |  | 0.1                                            | 0.03280746  | 0.000461986 | 36492  |  |
| 0.2                                        | 7.59E-06    | 0.002541258 | 64868  |  | 0.2                                        | 0.01862657  | 0.000591507 | 64866  |  | 0.2                                          | 0.000544325 | 0.001537665 | 64867  |  | 0.2                                            | 0.043659877 | 0.000398435 | 64867  |  |
| 0.3                                        | 9.85E-07    | 0.003071358 | 89561  |  | 0.3                                        | 0.009903031 | 0.000740065 | 89582  |  | 0.3                                          | 0.000318468 | 0.001680848 | 89584  |  | 0.3                                            | 0.111354514 | 0.000202683 | 89588  |  |
| 0.4                                        | 1.04E-06    | 0.003056949 | 111587 |  | 0.4                                        | 0.009303262 | 0.000754948 | 111583 |  | 0.4                                          | 0.000618528 | 0.001503651 | 111586 |  | 0.4                                            | 0.145312013 | 0.000152235 | 111587 |  |
| 0.5                                        | 3.75E-07    | 0.003323069 | 131216 |  | 0.5                                        | 0.005114448 | 0.000898899 | 131209 |  | 0.5                                          | 0.000624002 | 0.001501308 | 131213 |  | 0.5                                            | 0.113534923 | 0.000198906 | 131213 |  |

androsterone sulfate

cortisol

cortisone

dehydroisoandrosterone sulfate (DHEA-S)

| thresh | pval        | r2          | nsnps  |
|--------|-------------|-------------|--------|
| 0.001  | 0.109276235 | 0.000206282 | 868    |
| 0.05   | 0.163559371 | 0.000130854 | 20366  |
| 0.1    | 0.182956337 | 0.0001114   | 36489  |
| 0.2    | 0.27114584  | 5.06E-05    | 64865  |
| 0.3    | 0.162500197 | 0.000132005 | 89587  |
| 0.4    | 0.159175237 | 0.000135683 | 111584 |
| 0.5    | 0.225656899 | 7.73E-05    | 131214 |

| thresh | pval        | r2          | nsnps  |
|--------|-------------|-------------|--------|
| 0.001  | 0.462909299 | 1.18E-06    | 868    |
| 0.05   | 0.292033574 | 4.08E-05    | 20368  |
| 0.1    | 0.076635141 | 0.000277582 | 36489  |
| 0.2    | 0.00442669  | 0.00093234  | 64863  |
| 0.3    | 0.001994277 | 0.001127735 | 89580  |
| 0.4    | 0.001927038 | 0.001136206 | 111581 |
| 0.5    | 0.003630831 | 0.000980608 | 131210 |

| thresh | pval        | r2          | nsnps  |
|--------|-------------|-------------|--------|
| 0.001  | 0.371632187 | 1.50E-05    | 868    |
| 0.05   | 0.306779943 | 3.57E-05    | 20369  |
| 0.1    | 0.290973481 | 4.25E-05    | 36493  |
| 0.2    | 0.105837428 | 0.000218577 | 64861  |
| 0.3    | 0.035562067 | 0.000456298 | 89556  |
| 0.4    | 0.026563653 | 0.000523953 | 111580 |
| 0.5    | 0.023022628 | 0.000557571 | 131203 |

| thresh | pval        | r2          | nsnps  |
|--------|-------------|-------------|--------|
| 0.001  | 0.322082303 | 2.90E-05    | 868    |
| 0.05   | 0.027487006 | 0.000501218 | 20370  |
| 0.1    | 0.085984934 | 0.000253941 | 36492  |
| 0.2    | 0.140058842 | 0.000158784 | 64867  |
| 0.3    | 0.031930517 | 0.000467378 | 89583  |
| 0.4    | 0.017026086 | 0.000611314 | 111584 |
| 0.5    | 0.018279804 | 0.000594815 | 131211 |

| epiandrosterone sulfate |             |             |        |
|-------------------------|-------------|-------------|--------|
| thresh                  | pval        | r2          | nsnps  |
| 0.001                   | 0.24865173  | 6.29E-05    | 868    |
| 0.05                    | 0.163724439 | 0.00013089  | 20369  |
| 0.1                     | 0.146966484 | 0.000150346 | 36491  |
| 0.2                     | 0.160184449 | 0.000134777 | 64867  |
| 0.3                     | 0.071365243 | 0.000293196 | 89586  |
| 0.4                     | 0.06428055  | 0.000315237 | 111584 |
| 0.5                     | 0.091695286 | 0.000241567 | 131215 |

| estrone 3-sulfate |             |             |        |
|-------------------|-------------|-------------|--------|
| thresh            | pval        | r2          | nsnps  |
| 0.001             | 0.412827873 | 5.29E-05    | 870    |
| 0.05              | 0.019453077 | 0.004640194 | 20305  |
| 0.1               | 0.006570359 | 0.006684285 | 36387  |
| 0.2               | 0.004013568 | 0.007634189 | 64699  |
| 0.3               | 0.00149815  | 0.00956111  | 89325  |
| 0.4               | 0.002546268 | 0.008519965 | 111288 |
| 0.5               | 0.002123321 | 0.008875562 | 130837 |

| lathosterol |             |             |        |
|-------------|-------------|-------------|--------|
| thresh      | pval        | r2          | nsnps  |
| 0.001       | 0.35530052  | 2.70E-05    | 869    |
| 0.05        | 0.004604159 | 0.001327094 | 20364  |
| 0.1         | 0.168122638 | 0.000181048 | 36485  |
| 0.2         | 0.113278752 | 0.0002863   | 64841  |
| 0.3         | 0.150161909 | 0.000210034 | 89544  |
| 0.4         | 0.197513925 | 0.000141641 | 111537 |
| 0.5         | 0.265465445 | 7.69E-05    | 131160 |

| 5-alpha-pregnan-3beta,20alpha-disulfate |             |             |        |
|-----------------------------------------|-------------|-------------|--------|
| thresh                                  | pval        | r2          | nsnps  |
| 0.001                                   | 0.130320785 | 0.000498632 | 867    |
| 0.05                                    | 0.135498169 | 0.000477496 | 20368  |
| 0.1                                     | 0.112958973 | 0.00057783  | 36492  |
| 0.2                                     | 0.108381415 | 0.000601189 | 64861  |
| 0.3                                     | 0.143918252 | 0.000445196 | 89555  |
| 0.4                                     | 0.115164912 | 0.000566975 | 111579 |
| 0.5                                     | 0.131039622 | 0.000495636 | 131191 |



## High density lipoprotein (HDL) - Kettunen et al., 2016

| HDL.D    |             |             |       |        | HDL.C    |             |             |       |        | S.HDLL    |              |             |       |        | S.HDLL.P  |             |             |       |        |
|----------|-------------|-------------|-------|--------|----------|-------------|-------------|-------|--------|-----------|--------------|-------------|-------|--------|-----------|-------------|-------------|-------|--------|
| thresh   | pval        | r2          | nsnps |        | thresh   | pval        | r2          | nsnps |        | thresh    | pval         | r2          | nsnps |        | thresh    | pval        | r2          | nsnps |        |
| 0.001    | 0.298409888 | 1.45186E-05 |       | 1412   | 0.001    | 0.052392908 | 0.000122059 |       | 1412   | 0.001     | 0.318132621  | 1.16048E-05 |       | 1412   | 0.001     | 0.176453331 | 4.47755E-05 |       | 1412   |
| 0.05     | 0.014713189 | 0.000246039 |       | 35046  | 0.05     | 0.000189685 | 0.000585825 |       | 35085  | 0.05      | 0.024775499  | 0.000200083 |       | 35047  | 0.05      | 0.025164852 | 0.000198727 |       | 35052  |
| 0.1      | 0.003994281 | 0.000365006 |       | 63012  | 0.1      | 7.51004E-05 | 0.000666643 |       | 63090  | 0.1       | 0.063422688  | 0.000120923 |       | 63007  | 0.1       | 0.045877653 | 0.000147517 |       | 63023  |
| 0.2      | 0.000532092 | 0.000555671 |       | 111974 | 0.2      | 1.02432E-05 | 0.000841378 |       | 112122 | 0.2       | 0.069909987  | 0.000113102 |       | 111979 | 0.2       | 0.049323299 | 0.000141498 |       | 112000 |
| 0.3      | 0.004259802 | 0.000359032 |       | 155283 | 0.3      | 0.000138351 | 0.000613213 |       | 155506 | 0.3       | 0.043347405  | 0.000152258 |       | 155287 | 0.3       | 0.036990876 | 0.000165627 |       | 155317 |
| 0.4      | 0.002641992 | 0.000403571 |       | 193573 | 0.4      | 7.81571E-05 | 0.000662948 |       | 193869 | 0.4       | 0.020029325  | 0.000218697 |       | 193582 | 0.4       | 0.017909183 | 0.00022857  |       | 193619 |
| 0.5      | 0.003278729 | 0.000383383 |       | 228004 | 0.5      | 0.000184277 | 0.000588332 |       | 228354 | 0.5       | 0.027562775  | 0.000190833 |       | 228014 | 0.5       | 0.025229906 | 0.000198502 |       | 228059 |
| S.HDL.TG |             |             |       |        | M.HDL.C  |             |             |       |        | M.HDL.CE  |              |             |       |        | M.HDL.FC  |             |             |       |        |
| thresh   | pval        | r2          | nsnps |        | thresh   | pval        | r2          | nsnps |        | thresh    | pval         | r2          | nsnps |        | thresh    | pval        | r2          | nsnps |        |
| 0.001    | 0.193427921 | 3.47337E-05 |       | 1412   | 0.001    | 0.038628911 | 0.000144793 |       | 1412   | 0.001     | 0.033443847  | 0.000174207 |       | 1411   | 0.001     | 0.137649813 | 5.52027E-05 |       | 1412   |
| 0.05     | 0.438257897 | 1.12001E-06 |       | 35088  | 0.05     | 0.000477965 | 0.000505997 |       | 35087  | 0.05      | 0.005661026  | 0.000332745 |       | 35049  | 0.05      | 0.000985264 | 0.000444114 |       | 35088  |
| 0.1      | 0.152460344 | 4.88229E-05 |       | 63094  | 0.1      | 0.000167144 | 0.000596713 |       | 63095  | 0.1       | 0.0003961355 | 0.000365775 |       | 63015  | 0.1       | 0.000729956 | 0.000469695 |       | 63094  |
| 0.2      | 0.21858076  | 2.80041E-05 |       | 112128 | 0.2      | 3.04689E-05 | 0.000745305 |       | 112124 | 0.2       | 0.001472613  | 0.000458624 |       | 111988 | 0.2       | 0.000163865 | 0.000598404 |       | 112127 |
| 0.3      | 0.357837538 | 6.15428E-06 |       | 155513 | 0.3      | 0.00028475  | 0.000550601 |       | 155511 | 0.3       | 0.007216088  | 0.000310464 |       | 155299 | 0.3       | 0.001278994 | 0.000421946 |       | 155509 |
| 0.4      | 0.398010407 | 3.09965E-06 |       | 193882 | 0.4      | 0.000197768 | 0.000582128 |       | 193876 | 0.4       | 0.0004734263 | 0.000349249 |       | 193595 | 0.4       | 0.000804525 | 0.000461388 |       | 193877 |
| 0.5      | 0.482106884 | 9.33759E-08 |       | 228370 | 0.5      | 0.000889972 | 0.0004528   |       | 228362 | 0.5       | 0.012641939  | 0.000259622 |       | 228030 | 0.5       | 0.002639636 | 0.000360861 |       | 228364 |
| M.HDL.L  |             |             |       |        | M.HDL.P  |             |             |       |        | M.HDL.PL  |              |             |       |        | L.HDL.C   |             |             |       |        |
| thresh   | pval        | r2          | nsnps |        | thresh   | pval        | r2          | nsnps |        | thresh    | pval         | r2          | nsnps |        | thresh    | pval        | r2          | nsnps |        |
| 0.001    | 0.080501627 | 0.000101939 |       | 1412   | 0.001    | 0.098286218 | 8.65245E-05 |       | 1412   | 0.001     | 0.141183082  | 5.36059E-05 |       | 1412   | 0.001     | 0.088425222 | 8.46005E-05 |       | 1412   |
| 0.05     | 0.001748902 | 0.000442371 |       | 35052  | 0.05     | 0.001509341 | 0.000456293 |       | 35052  | 0.05      | 0.000374326  | 0.000527016 |       | 35088  | 0.05      | 0.001848176 | 0.000390835 |       | 35085  |
| 0.1      | 0.003889429 | 0.000367477 |       | 63023  | 0.1      | 0.004685503 | 0.000350207 |       | 63023  | 0.1       | 0.000488665  | 0.000504095 |       | 63094  | 0.1       | 0.000179304 | 0.000590622 |       | 63090  |
| 0.2      | 0.001063009 | 0.000489551 |       | 112000 | 0.2      | 0.000965533 | 0.000498705 |       | 112000 | 0.2       | 2.28124E-05  | 0.000770727 |       | 112128 | 0.2       | 4.34811E-05 | 0.000714123 |       | 112118 |
| 0.3      | 0.00504242  | 0.000343419 |       | 155317 | 0.3      | 0.004490302 | 0.000354147 |       | 155317 | 0.3       | 0.000195838  | 0.000582978 |       | 155513 | 0.3       | 0.000780141 | 0.000464037 |       | 155496 |
| 0.4      | 0.004319084 | 0.00035775  |       | 193619 | 0.4      | 0.003842586 | 0.000368604 |       | 193619 | 0.4       | 0.000156308  | 0.000602529 |       | 193882 | 0.4       | 0.000591468 | 0.000487719 |       | 193861 |
| 0.5      | 0.009735483 | 0.000283191 |       | 228059 | 0.5      | 0.008059877 | 0.000300363 |       | 228059 | 0.5       | 0.000526443  | 0.000497704 |       | 228370 | 0.5       | 0.001181592 | 0.000428687 |       | 228343 |
| L.HDL.CE |             |             |       |        | L.HDL.FC |             |             |       |        | L.HDL.L   |              |             |       |        | L.HDL.P   |             |             |       |        |
| thresh   | pval        | r2          | nsnps |        | thresh   | pval        | r2          | nsnps |        | thresh    | pval         | r2          | nsnps |        | thresh    | pval        | r2          | nsnps |        |
| 0.001    | 0.09018167  | 9.31118E-05 |       | 1412   | 0.001    | 0.219531576 | 2.77713E-05 |       | 1412   | 0.001     | 0.14437416   | 5.83934E-05 |       | 1412   | 0.001     | 0.14730247  | 5.6993E-05  |       | 1411   |
| 0.05     | 0.006564726 | 0.00031913  |       | 35052  | 0.05     | 0.0042417   | 0.000321321 |       | 35087  | 0.05      | 0.006785176  | 0.000316102 |       | 35052  | 0.05      | 0.007184276 | 0.000310868 |       | 35053  |
| 0.1      | 0.001485269 | 0.000457814 |       | 63023  | 0.1      | 0.000349699 | 0.000532853 |       | 63092  | 0.1       | 0.001917531  | 0.000433689 |       | 63023  | 0.1       | 0.00208924  | 0.000425613 |       | 63023  |
| 0.2      | 0.000860471 | 0.000509685 |       | 112000 | 0.2      | 5.16574E-05 | 0.000699006 |       | 112127 | 0.2       | 0.000309927  | 0.00060768  |       | 112000 | 0.2       | 0.000233827 | 0.000634905 |       | 111997 |
| 0.3      | 0.009330039 | 0.000287049 |       | 155317 | 0.3      | 0.000588062 | 0.000488191 |       | 155512 | 0.3       | 0.003698428  | 0.00037216  |       | 155317 | 0.3       | 0.002942748 | 0.00039348  |       | 155311 |
| 0.4      | 0.006293689 | 0.000323001 |       | 193619 | 0.4      | 0.000273303 | 0.000554118 |       | 193881 | 0.4       | 0.00204165   | 0.000427781 |       | 193619 | 0.4       | 0.001732028 | 0.000443286 |       | 193607 |
| 0.5      | 0.010181875 | 0.000279131 |       | 228059 | 0.5      | 0.00052424  | 0.000493549 |       | 228367 | 0.5       | 0.003604272  | 0.00037456  |       | 228059 | 0.5       | 0.003132041 | 0.000387655 |       | 228046 |
| L.HDL.PL |             |             |       |        | XL.HDL.C |             |             |       |        | XL.HDL.CE |              |             |       |        | XL.HDL.FC |             |             |       |        |
| thresh   | pval        | r2          | nsnps |        | thresh   | pval        | r2          | nsnps |        | thresh    | pval         | r2          | nsnps |        | thresh    | pval        | r2          | nsnps |        |
| 0.001    | 0.162037715 | 5.04542E-05 |       | 1412   | 0.001    | 0.145529422 | 5.17497E-05 |       | 1412   | 0.001     | 0.17474898   | 4.54138E-05 |       | 1412   | 0.001     | 0.140293137 | 5.4044E-05  |       | 1412   |
| 0.05     | 0.004879768 | 0.000346449 |       | 35052  | 0.05     | 0.021905045 | 0.000188648 |       | 35088  | 0.05      | 0.033352006  | 0.000174442 |       | 35047  | 0.05      | 0.006485232 | 0.000286522 |       | 35088  |
| 0.1      | 0.00128502  | 0.000471536 |       | 63023  | 0.1      | 0.006902434 | 0.000281433 |       | 63093  | 0.1       | 0.015169934  | 0.000243312 |       | 63016  | 0.1       | 0.000937357 | 0.000448712 |       | 63094  |
| 0.2      | 0.00011154  | 0.000706747 |       | 112000 | 0.2      | 0.012117107 | 0.000162571 |       | 112126 | 0.2       | 0.038411614  | 0.000162435 |       | 111980 | 0.2       | 0.000687617 | 0.000475178 |       | 112128 |
| 0.3      | 0.001393985 | 0.00046382  |       | 155317 | 0.3      | 0.047605396 | 0.000129239 |       | 155509 | 0.3       | 0.136074726  | 6.25664E-05 |       | 155290 | 0.3       | 0.003766027 | 0.00033146  |       | 155513 |
| 0.4      | 0.000653346 | 0.000535997 |       | 193619 | 0.4      | 0.051683737 | 0.000123149 |       | 193875 | 0.4       | 0.133804035  | 6.37642E-05 |       | 193587 | 0.4       | 0.004279833 | 0.000320832 |       | 193882 |
| 0.5      | 0.001377793 | 0.000464927 |       | 228059 | 0.5      | 0.032370046 | 0.000158371 |       | 228362 | 0.5       | 0.099081673  | 8.59123E-05 |       | 228017 | 0.5       | 0.002966698 | 0.000351364 |       | 228369 |
| XL.HDL.L |             |             |       |        | XL.HDL.P |             |             |       |        | XL.HDL.PL |              |             |       |        | XL.HDL.TG |             |             |       |        |
| thresh   | pval        | r2          | nsnps |        | thresh   | pval        | r2          | nsnps |        | thresh    | pval         | r2          | nsnps |        | thresh    | pval        | r2          | nsnps |        |
| 0.001    | 0.333182326 | 9.64474E-06 |       | 1411   | 0.001    | 0.393477951 | 3.78993E-06 |       | 1412   | 0.001     | 0.305923554  | 1.33603E-05 |       | 1412   | 0.001     | 0.441038155 | 1.02173E-06 |       | 1412   |
| 0.05     | 0.041256953 | 0.000156407 |       | 35050  | 0.05     | 0.021074231 | 0.000214227 |       | 35052  | 0.05      | 0.025967276  | 0.000196    |       | 35052  | 0.05      | 0.254061132 | 2.03347E-05 |       | 35088  |
| 0.1      | 0.007748542 | 0.000303957 |       | 63013  | 0.1      | 0.001488101 | 0.000457634 |       | 63023  | 0.1       | 0.003535757  | 0.000376348 |       | 63023  | 0.1       | 0.335409282 | 8.38806E-06 |       | 63094  |
| 0.2      | 0.013740024 | 0.000252155 |       | 111976 | 0.2      | 0.000578825 | 0.000547598 |       | 112000 | 0.2       | 0.002585328  | 0.000405603 |       | 112000 | 0.2       | 0.338064512 | 8.10343E-06 |       | 112128 |
| 0.3      | 0.066164776 | 0.000117513 |       | 155278 | 0.3      | 0.00260638  | 0.000404842 |       | 155317 | 0.3       | 0.01636236   | 0.000236579 |       | 155317 | 0.3       | 0.321184515 | 1.00137E-05 |       | 155513 |

0.4 0.057900536 0.000128317 193569  
 0.5 0.04355814 0.000151852 228002

0.4 0.001356104 0.000466431 193619  
 0.5 0.000866977 0.000508966 228059

0.4 0.01174052 0.000266273 193619  
 0.5 0.009785217 0.000282729 228059

0.4 0.362904643 5.71109E-06 193882  
 0.5 0.391887039 3.49635E-06 228369

**Intermediate density lipoprotein (IDL) - Kettunen et al., 2016**

| IDL.C  |             |             |        |
|--------|-------------|-------------|--------|
| thresh | pval        | r2          | nsnps  |
| 0.001  | 0.031795622 | 0.000178532 | 1412   |
| 0.05   | 0.206681483 | 3.47167E-05 | 35052  |
| 0.1    | 0.1148595   | 7.4848E-05  | 63023  |
| 0.2    | 0.180127061 | 4.34281E-05 | 112000 |
| 0.3    | 0.178633673 | 4.39712E-05 | 155317 |
| 0.4    | 0.170108487 | 4.71951E-05 | 193619 |
| 0.5    | 0.156883629 | 5.26501E-05 | 228059 |

| IDL.FC |             |             |        |
|--------|-------------|-------------|--------|
| thresh | pval        | r2          | nsnps  |
| 0.001  | 0.009183582 | 0.0002579   | 1412   |
| 0.05   | 0.281138764 | 1.55746E-05 | 35084  |
| 0.1    | 0.148815151 | 5.03156E-05 | 63084  |
| 0.2    | 0.273146566 | 1.68838E-05 | 112114 |
| 0.3    | 0.270232464 | 1.73791E-05 | 155496 |
| 0.4    | 0.305639389 | 1.19818E-05 | 193858 |
| 0.5    | 0.296927888 | 1.31899E-05 | 228342 |

| IDL.L  |              |             |        |
|--------|--------------|-------------|--------|
| thresh | pval         | r2          | nsnps  |
| 0.001  | 0.043489118  | 0.000151985 | 1412   |
| 0.05   | 0.293784183  | 1.52626E-05 | 35052  |
| 0.1    | 0.156323173  | 5.28945E-05 | 63023  |
| 0.2    | 0.277001487  | 1.81701E-05 | 112000 |
| 0.3    | 0.268763301  | 1.97239E-05 | 155317 |
| 0.4    | 0.2666781218 | 2.0111E-05  | 193619 |
| 0.5    | 0.258346173  | 2.18174E-05 | 228059 |

| IDL.P  |             |             |        |
|--------|-------------|-------------|--------|
| thresh | pval        | r2          | nsnps  |
| 0.001  | 0.050467457 | 0.000139601 | 1412   |
| 0.05   | 0.332860874 | 9.68435E-06 | 35052  |
| 0.1    | 0.17503497  | 4.53061E-05 | 63023  |
| 0.2    | 0.316870045 | 1.17793E-05 | 112000 |
| 0.3    | 0.300928458 | 1.41235E-05 | 155317 |
| 0.4    | 0.306939856 | 1.27658E-05 | 193619 |
| 0.5    | 0.308964824 | 1.29086E-05 | 228059 |

| IDL.PL |             |             |        |
|--------|-------------|-------------|--------|
| thresh | pval        | r2          | nsnps  |
| 0.001  | 0.01996059  | 0.00019578  | 1412   |
| 0.05   | 0.286793099 | 1.46907E-05 | 35088  |
| 0.1    | 0.129134898 | 5.92778E-05 | 63094  |
| 0.2    | 0.306418815 | 1.18773E-05 | 112128 |
| 0.3    | 0.328639228 | 9.13055E-06 | 155513 |
| 0.4    | 0.378018417 | 4.47737E-06 | 193882 |
| 0.5    | 0.377093088 | 4.54783E-06 | 228370 |

| IDL.TG |             |             |        |
|--------|-------------|-------------|--------|
| thresh | pval        | r2          | nsnps  |
| 0.001  | 0.218286925 | 3.14046E-05 | 1412   |
| 0.05   | 0.435900101 | 1.35116E-06 | 35052  |
| 0.1    | 0.231293183 | 2.79988E-05 | 63023  |
| 0.2    | 0.406585921 | 2.89808E-06 | 112000 |
| 0.3    | 0.376003765 | 5.1809E-06  | 155317 |
| 0.4    | 0.382568616 | 4.63064E-06 | 193619 |
| 0.5    | 0.395485307 | 3.64508E-06 | 228059 |

**Low density lipoprotein (LDL) - Kettunen et al., 2016**

| LDL.D  |             |             |        |
|--------|-------------|-------------|--------|
| thresh | pval        | r2          | nsnps  |
| 0.001  | 0.151008244 | 5.52711E-05 | 1412   |
| 0.05   | 0.248637133 | 2.39061E-05 | 35052  |
| 0.1    | 0.449682474 | 8.29816E-07 | 63023  |
| 0.2    | 0.148529958 | 5.64165E-05 | 112000 |
| 0.3    | 0.152527976 | 5.45806E-05 | 155317 |
| 0.4    | 0.164815907 | 4.93084E-05 | 193619 |
| 0.5    | 0.187025267 | 4.09977E-05 | 228059 |

| LDL.C  |             |             |        |
|--------|-------------|-------------|--------|
| thresh | pval        | r2          | nsnps  |
| 0.001  | 0.089353497 | 8.38753E-05 | 1412   |
| 0.05   | 0.213492229 | 2.92686E-05 | 35088  |
| 0.1    | 0.128472216 | 5.96089E-05 | 63094  |
| 0.2    | 0.066715695 | 0.000104458 | 112128 |
| 0.3    | 0.081522882 | 9.02482E-05 | 155513 |
| 0.4    | 0.092283805 | 8.16543E-05 | 193882 |
| 0.5    | 0.105573668 | 7.25212E-05 | 228370 |

| S.LDL.C |             |             |        |
|---------|-------------|-------------|--------|
| thresh  | pval        | r2          | nsnps  |
| 0.001   | 0.063045159 | 0.000108548 | 1412   |
| 0.05    | 0.391737436 | 3.50303E-06 | 35088  |
| 0.1     | 0.146996728 | 5.10862E-05 | 63094  |
| 0.2     | 0.060863106 | 0.000111098 | 112128 |
| 0.3     | 0.078338643 | 9.30559E-05 | 155513 |
| 0.4     | 0.079212511 | 9.22761E-05 | 193882 |
| 0.5     | 0.093400023 | 8.08409E-05 | 228370 |

| S.LDL.L |             |             |        |
|---------|-------------|-------------|--------|
| thresh  | pval        | r2          | nsnps  |
| 0.001   | 0.077457521 | 0.000104969 | 1412   |
| 0.05    | 0.312140116 | 1.24473E-05 | 35052  |
| 0.1     | 0.178360482 | 5.40713E-05 | 63021  |
| 0.2     | 0.105558689 | 8.11334E-05 | 111998 |
| 0.3     | 0.109739476 | 7.82294E-05 | 155316 |
| 0.4     | 0.122196081 | 7.03072E-05 | 193618 |
| 0.5     | 0.141170685 | 5.99673E-05 | 228057 |

| S.LDL.P |             |             |        |
|---------|-------------|-------------|--------|
| thresh  | pval        | r2          | nsnps  |
| 0.001   | 0.151559382 | 5.50196E-05 | 1412   |
| 0.05    | 0.477164449 | 1.70188E-07 | 35052  |
| 0.1     | 0.277069051 | 1.81577E-05 | 63023  |
| 0.2     | 0.191892807 | 3.93569E-05 | 112000 |
| 0.3     | 0.185651221 | 4.14717E-05 | 155317 |
| 0.4     | 0.195760448 | 3.80947E-05 | 193619 |
| 0.5     | 0.219617632 | 3.10419E-05 | 228059 |

| M.LDL.C |             |             |        |
|---------|-------------|-------------|--------|
| thresh  | pval        | r2          | nsnps  |
| 0.001   | 0.140808524 | 5.37705E-05 | 1412   |
| 0.05    | 0.382927718 | 4.11359E-06 | 35086  |
| 0.1     | 0.278056771 | 1.6071E-05  | 63088  |
| 0.2     | 0.151524937 | 4.91998E-05 | 112126 |
| 0.3     | 0.172483138 | 4.13688E-05 | 155509 |
| 0.4     | 0.197056384 | 3.36844E-05 | 193875 |
| 0.5     | 0.21354319  | 2.92557E-05 | 228365 |

| M.LDL.CE |             |             |        |
|----------|-------------|-------------|--------|
| thresh   | pval        | r2          | nsnps  |
| 0.001    | 0.061309922 | 0.000123665 | 1412   |
| 0.05     | 0.289923557 | 1.5902E-05  | 35052  |
| 0.1      | 0.154782829 | 5.35724E-05 | 63023  |
| 0.2      | 0.079273923 | 0.000103145 | 112000 |
| 0.3      | 0.090177037 | 9.31158E-05 | 155317 |
| 0.4      | 0.101683158 | 8.39498E-05 | 193619 |
| 0.5      | 0.107626752 | 7.96801E-05 | 228059 |

| M.LDL.L |             |             |        |
|---------|-------------|-------------|--------|
| thresh  | pval        | r2          | nsnps  |
| 0.001   | 0.058360999 | 0.000127671 | 1412   |
| 0.05    | 0.251791573 | 2.32124E-05 | 35051  |
| 0.1     | 0.154664613 | 5.36248E-05 | 63022  |
| 0.2     | 0.096085658 | 8.82487E-05 | 111996 |
| 0.3     | 0.108801269 | 7.88695E-05 | 155313 |
| 0.4     | 0.123960369 | 6.92646E-05 | 193614 |
| 0.5     | 0.135671688 | 6.27772E-05 | 228054 |

| M.LDL.P |             |             |        |
|---------|-------------|-------------|--------|
| thresh  | pval        | r2          | nsnps  |
| 0.001   | 0.07046738  | 0.000112468 | 1412   |
| 0.05    | 0.280773431 | 1.74872E-05 | 35051  |
| 0.1     | 0.167296109 | 4.8307E-05  | 63021  |
| 0.2     | 0.113740347 | 7.55715E-05 | 111997 |
| 0.3     | 0.124712592 | 6.88255E-05 | 155312 |
| 0.4     | 0.135254803 | 6.2996E-05  | 193613 |
| 0.5     | 0.153453482 | 5.41645E-05 | 228052 |

| M.LDL.PL |             |             |        |
|----------|-------------|-------------|--------|
| thresh   | pval        | r2          | nsnps  |
| 0.001    | 0.224103154 | 2.66804E-05 | 1412   |
| 0.05     | 0.428980621 | 1.48577E-06 | 35088  |
| 0.1      | 0.297774555 | 1.30698E-05 | 63094  |
| 0.2      | 0.233000406 | 2.46515E-05 | 112128 |
| 0.3      | 0.251149742 | 2.08772E-05 | 155513 |
| 0.4      | 0.261360609 | 1.89497E-05 | 193882 |
| 0.5      | 0.280936023 | 1.56077E-05 | 228370 |

| L.LDL.C |             |             |        |
|---------|-------------|-------------|--------|
| thresh  | pval        | r2          | nsnps  |
| 0.001   | 0.04345399  | 0.000135975 | 1412   |
| 0.05    | 0.179481819 | 3.90451E-05 | 35088  |
| 0.1     | 0.118442349 | 6.49124E-05 | 63094  |
| 0.2     | 0.107070124 | 7.16016E-05 | 112128 |
| 0.3     | 0.123546386 | 6.21578E-05 | 155513 |
| 0.4     | 0.139620246 | 5.43221E-05 | 193882 |
| 0.5     | 0.133795619 | 5.70257E-05 | 228370 |

| L.LDL.CE |             |             |        |
|----------|-------------|-------------|--------|
| thresh   | pval        | r2          | nsnps  |
| 0.001    | 0.058921546 | 0.000126893 | 1412   |
| 0.05     | 0.258097159 | 2.18692E-05 | 35052  |
| 0.1      | 0.148862463 | 5.62614E-05 | 63023  |
| 0.2      | 0.101155081 | 8.43434E-05 | 112000 |
| 0.3      | 0.113000484 | 7.60545E-05 | 155317 |
| 0.4      | 0.116807945 | 7.36085E-05 | 193619 |
| 0.5      | 0.115256435 | 7.45935E-05 | 228059 |

L.LDL.FC

L.LDL.L

L.LDL.P

L.LDL.PL

| thresh | pval        | r2          | nsnps  | thresh | pval        | r2          | nsnps  | thresh | pval        | r2          | nsnps  | thresh | pval        | r2          | nsnps  |
|--------|-------------|-------------|--------|--------|-------------|-------------|--------|--------|-------------|-------------|--------|--------|-------------|-------------|--------|
| 0.001  | 0.024335161 | 0.000180299 | 1412   | 0.001  | 0.049691055 | 0.000140883 | 1412   | 0.001  | 0.057144818 | 0.000129389 | 1412   | 0.001  | 0.034434164 | 0.000153575 | 1412   |
| 0.05   | 0.209440656 | 3.03151E-05 | 35088  | 0.05   | 0.251472406 | 2.32819E-05 | 35052  | 0.05   | 0.275602601 | 1.84278E-05 | 35052  | 0.05   | 0.222880416 | 2.69791E-05 | 35088  |
| 0.1    | 0.169649166 | 4.23596E-05 | 63094  | 0.1    | 0.150601435 | 5.54574E-05 | 63023  | 0.1    | 0.171003212 | 4.68466E-05 | 63023  | 0.1    | 0.150561248 | 4.96144E-05 | 63094  |
| 0.2    | 0.246655901 | 2.17717E-05 | 112128 | 0.2    | 0.146716254 | 5.72705E-05 | 112000 | 0.2    | 0.18425572  | 4.19582E-05 | 112000 | 0.2    | 0.248768227 | 2.13542E-05 | 112128 |
| 0.3    | 0.283146468 | 1.52597E-05 | 155513 | 0.3    | 0.154487909 | 5.37032E-05 | 155317 | 0.3    | 0.19018477  | 3.99259E-05 | 155317 | 0.3    | 0.291104482 | 1.40452E-05 | 155513 |
| 0.4    | 0.304665511 | 1.21155E-05 | 193882 | 0.4    | 0.160935172 | 5.09161E-05 | 193619 | 0.4    | 0.198078017 | 3.73553E-05 | 193619 | 0.4    | 0.307045544 | 1.17986E-05 | 193882 |
| 0.5    | 0.301277174 | 1.25799E-05 | 228370 | 0.5    | 0.165075358 | 4.92027E-05 | 228059 | 0.5    | 0.20597926  | 3.4926E-05  | 228059 | 0.5    | 0.302707484 | 1.23853E-05 | 228370 |

### Very low density lipoprotein (VLDL) - Kettunen et al., 2016

| VLDL.D     |             |             |        | XS.VLDL.L |             |             |        | XS.VLDL.P |              |             |        | XS.VLDL.PL |              |             |        |
|------------|-------------|-------------|--------|-----------|-------------|-------------|--------|-----------|--------------|-------------|--------|------------|--------------|-------------|--------|
| thresh     | pval        | r2          | nsnps  | thresh    | pval        | r2          | nsnps  | thresh    | pval         | r2          | nsnps  | thresh     | pval         | r2          | nsnps  |
| 0.001      | 0.216325731 | 3.19455E-05 | 1412   | 0.001     | 0.065483009 | 0.000118346 | 1412   | 0.001     | 0.071968113  | 0.00011079  | 1412   | 0.001      | 0.022551996  | 0.000208288 | 1412   |
| 0.05       | 0.194726661 | 3.84286E-05 | 35052  | 0.05      | 0.322403954 | 1.10262E-05 | 35052  | 0.05      | 0.410883114  | 2.63313E-06 | 35045  | 0.05       | 0.310529567  | 1.26799E-05 | 35049  |
| 0.1        | 0.372023578 | 5.53111E-06 | 63023  | 0.1       | 0.088447328 | 9.46109E-05 | 63023  | 0.1       | 0.108686018  | 7.89486E-05 | 63012  | 0.1        | 0.134909717  | 6.31778E-05 | 63019  |
| 0.2        | 0.102828539 | 8.31044E-05 | 112000 | 0.2       | 0.199365107 | 3.69501E-05 | 112000 | 0.2       | 0.250732671  | 2.34436E-05 | 111973 | 0.2        | 0.309548237  | 1.2823E-05  | 111994 |
| 0.3        | 0.055601427 | 0.000131629 | 155317 | 0.3       | 0.199754985 | 3.68281E-05 | 155317 | 0.3       | 0.242369017  | 2.53297E-05 | 155277 | 0.3        | 0.300348643  | 1.42139E-05 | 155304 |
| 0.4        | 0.044629136 | 0.00014982  | 193619 | 0.4       | 0.214915194 | 3.23391E-05 | 193619 | 0.4       | 0.276713258  | 1.8223E-05  | 193566 | 0.4        | 0.33186546   | 9.80762E-06 | 193597 |
| 0.5        | 0.068449229 | 0.00011479  | 228059 | 0.5       | 0.201714718 | 3.622E-05   | 228059 | 0.5       | 0.271106221  | 1.92731E-05 | 227993 | 0.5        | 0.319314964  | 1.14428E-05 | 228035 |
| XS.VLDL.TG |             |             |        | S.VLDL.C  |             |             |        | S.VLDL.FC |              |             |        | S.VLDL.L   |              |             |        |
| thresh     | pval        | r2          | nsnps  | thresh    | pval        | r2          | nsnps  | thresh    | pval         | r2          | nsnps  | thresh     | pval         | r2          | nsnps  |
| 0.001      | 0.243584926 | 2.50488E-05 | 1412   | 0.001     | 0.060689447 | 0.0001113   | 1412   | 0.001     | 0.168790949  | 4.26538E-05 | 1412   | 0.001      | 0.200064385  | 3.67315E-05 | 1412   |
| 0.05       | 0.433291116 | 1.46445E-06 | 35052  | 0.05      | 0.097488804 | 7.79113E-05 | 35080  | 0.05      | 0.196485168  | 3.38475E-05 | 35083  | 0.05       | 0.270038124  | 1.94778E-05 | 35052  |
| 0.1        | 0.146967668 | 5.71513E-05 | 63023  | 0.1       | 0.042083761 | 0.000138346 | 63079  | 0.1       | 0.045686242  | 0.000132188 | 63085  | 0.1        | 0.093301654  | 9.04973E-05 | 63023  |
| 0.2        | 0.139029047 | 6.1045E-05  | 112000 | 0.2       | 0.016203942 | 0.000212289 | 112099 | 0.2       | 0.010850021  | 0.000244401 | 112110 | 0.2        | 0.022434922  | 0.000208743 | 111994 |
| 0.3        | 0.145758601 | 5.77268E-05 | 155317 | 0.3       | 0.026115709 | 0.000174793 | 155476 | 0.3       | 0.013643964  | 0.000225982 | 155485 | 0.3        | 0.025178828  | 0.000198678 | 155310 |
| 0.4        | 0.153375796 | 5.41993E-05 | 193619 | 0.4       | 0.040794406 | 0.000140685 | 193841 | 0.4       | 0.017586773  | 0.000205774 | 193846 | 0.4        | 0.026342204  | 0.000194756 | 193609 |
| 0.5        | 0.169356547 | 4.749E-05   | 228059 | 0.5       | 0.032157531 | 0.000158751 | 228319 | 0.5       | 0.014491883  | 0.000221163 | 228324 | 0.5        | 0.027695707  | 0.000190417 | 228050 |
| S.VLDL.P   |             |             |        | S.VLDL.PL |             |             |        | S.VLDL.TG |              |             |        | M.VLDL.C   |              |             |        |
| thresh     | pval        | r2          | nsnps  | thresh    | pval        | r2          | nsnps  | thresh    | pval         | r2          | nsnps  | thresh     | pval         | r2          | nsnps  |
| 0.001      | 0.254046792 | 2.27254E-05 | 1412   | 0.001     | 0.120142382 | 6.39821E-05 | 1412   | 0.001     | 0.428385397  | 1.51105E-06 | 1412   | 0.001      | 0.334903572  | 8.43706E-06 | 1412   |
| 0.05       | 0.300137815 | 1.42468E-05 | 35052  | 0.05      | 0.257672684 | 1.96369E-05 | 35088  | 0.05      | 0.321528015  | 9.96226E-06 | 35085  | 0.05       | 0.418315088  | 1.97303E-06 | 35088  |
| 0.1        | 0.091351561 | 9.21193E-05 | 63023  | 0.1       | 0.096460633 | 7.86553E-05 | 63096  | 0.1       | 0.047178608  | 0.0001298   | 63085  | 0.1        | 0.114972062  | 6.6872E-05  | 63094  |
| 0.2        | 0.018690652 | 0.000224795 | 112000 | 0.2       | 0.036183916 | 0.000149795 | 112129 | 0.2       | 0.005886959  | 0.00029426  | 112120 | 0.2        | 0.03911506   | 0.000143894 | 112128 |
| 0.3        | 0.020859666 | 0.000215125 | 155317 | 0.3       | 0.048362752 | 0.000128001 | 155515 | 0.3       | 0.0083791206 | 0.00026596  | 155502 | 0.3        | 0.034791978  | 0.00015278  | 155513 |
| 0.4        | 0.02087652  | 0.000215054 | 193619 | 0.4       | 0.061596521 | 0.000110256 | 193880 | 0.4       | 0.00889838   | 0.000260475 | 193861 | 0.4        | 0.034894369  | 0.000152556 | 193882 |
| 0.5        | 0.023334481 | 0.000205307 | 228059 | 0.5       | 0.055188494 | 0.000118262 | 228364 | 0.5       | 0.012138117  | 0.000235374 | 228342 | 0.5        | 0.037058004  | 0.000147983 | 228370 |
| M.VLDL.CE  |             |             |        | M.VLDL.FC |             |             |        | M.VLDL.L  |              |             |        | M.VLDL.P   |              |             |        |
| thresh     | pval        | r2          | nsnps  | thresh    | pval        | r2          | nsnps  | thresh    | pval         | r2          | nsnps  | thresh     | pval         | r2          | nsnps  |
| 0.001      | 0.259310189 | 2.16174E-05 | 1412   | 0.001     | 0.410923079 | 2.3871E-06  | 1412   | 0.001     | 0.285492953  | 1.66571E-05 | 1412   | 0.001      | 0.324985596  | 1.06852E-05 | 1412   |
| 0.05       | 0.326973286 | 1.0427E-05  | 35052  | 0.05      | 0.493165264 | 1.38201E-08 | 35067  | 0.05      | 0.360043012  | 6.66268E-06 | 35052  | 0.05       | 0.3400957231 | 8.71572E-06 | 35052  |
| 0.1        | 0.104268914 | 8.20569E-05 | 63023  | 0.1       | 0.153449731 | 4.915E-05   | 63038  | 0.1       | 0.272399971  | 1.90273E-05 | 63023  | 0.1        | 0.082368036  | 0.000100146 | 63023  |
| 0.2        | 0.029202787 | 0.000185843 | 112000 | 0.2       | 0.040826341 | 0.000142725 | 112021 | 0.2       | 0.09618586   | 8.81692E-05 | 112000 | 0.2        | 0.005068347  | 0.000342945 | 112000 |
| 0.3        | 0.021828145 | 0.000211144 | 155317 | 0.3       | 0.037243164 | 0.000149767 | 155350 | 0.3       | 0.091569855  | 9.19358E-05 | 155317 | 0.3        | 0.002553552  | 0.000406762 | 155319 |
| 0.4        | 0.016949991 | 0.000233447 | 193619 | 0.4       | 0.051033019 | 0.000125838 | 193675 | 0.4       | 0.097271036  | 8.73143E-05 | 193619 | 0.4        | 0.00218951   | 0.000421203 | 193621 |
| 0.5        | 0.018887783 | 0.000223868 | 228059 | 0.5       | 0.054609659 | 0.000120778 | 228136 | 0.5       | 0.121801476  | 7.0543E-05  | 228059 | 0.5        | 0.00491533   | 0.000345778 | 228060 |
| M.VLDL.TG  |             |             |        | L.VLDL.C  |             |             |        | L.VLDL.CE |              |             |        | L.VLDL.FC  |              |             |        |
| thresh     | pval        | r2          | nsnps  | thresh    | pval        | r2          | nsnps  | thresh    | pval         | r2          | nsnps  | thresh     | pval         | r2          | nsnps  |
| 0.001      | 0.246250671 | 2.21765E-05 | 1412   | 0.001     | 0.161358336 | 4.60505E-05 | 1412   | 0.001     | 0.22286003   | 3.067E-05   | 1411   | 0.001      | 0.053541312  | 0.000122262 | 1412   |
| 0.05       | 0.433840156 | 1.30679E-06 | 35067  | 0.05      | 0.291665915 | 1.41689E-05 | 35057  | 0.05      | 0.429459057  | 1.66643E-06 | 35018  | 0.05       | 0.202120014  | 3.27557E-05 | 35067  |
| 0.1        | 0.166766215 | 4.4024E-05  | 63038  | 0.1       | 0.326928083 | 9.4689E-06  | 63013  | 0.1       | 0.220107996  | 3.14193E-05 | 62951  | 0.1        | 0.414633516  | 1.28953E-06 | 63038  |
| 0.2        | 0.041359273 | 0.000141728 | 112021 | 0.2       | 0.191003497 | 3.59887E-05 | 111977 | 0.2       | 0.042390299  | 0.000156675 | 111853 | 0.2        | 0.211205809  | 3.03035E-05 | 112021 |
| 0.3        | 0.045188754 | 0.000134996 | 155350 | 0.3       | 0.145882684 | 5.23395E-05 | 155298 | 0.3       | 0.028090692  | 0.000192317 | 155099 | 0.3        | 0.150589636  | 5.03314E-05 | 155350 |
| 0.4        | 0.079476614 | 9.34073E-05 | 193675 | 0.4       | 0.180179065 | 3.93986E-05 | 193606 | 0.4       | 0.028974874  | 0.000189598 | 193352 | 0.4        | 0.195353719  | 3.46891E-05 | 193675 |

| L.VLDL.L   |             |             |        |  | L.VLDL.P   |             |             |        |  | L.VLDL.PL   |             |             |        |  | L.VLDL.TG   |             |             |        |  |
|------------|-------------|-------------|--------|--|------------|-------------|-------------|--------|--|-------------|-------------|-------------|--------|--|-------------|-------------|-------------|--------|--|
| thresh     | pval        | r2          | nsnps  |  | thresh     | pval        | r2          | nsnps  |  | thresh      | pval        | r2          | nsnps  |  | thresh      | pval        | r2          | nsnps  |  |
| 0.001      | 0.05785503  | 0.0001305   | 1411   |  | 0.001      | 0.078163651 | 0.000105975 | 1411   |  | 0.001       | 0.155441629 | 4.83495E-05 | 1412   |  | 0.001       | 0.043211946 | 0.000138403 | 1412   |  |
| 0.05       | 0.147562559 | 5.78091E-05 | 35023  |  | 0.05       | 0.316922046 | 1.19664E-05 | 35023  |  | 0.05        | 0.164388029 | 4.49028E-05 | 35052  |  | 0.05        | 0.216889358 | 2.88467E-05 | 35065  |  |
| 0.1        | 0.458386095 | 5.75968E-07 | 62957  |  | 0.1        | 0.112139367 | 7.78863E-05 | 62957  |  | 0.1         | 0.465470655 | 3.53597E-07 | 63011  |  | 0.1         | 0.330297655 | 9.07766E-06 | 63036  |  |
| 0.2        | 0.288275597 | 1.64473E-05 | 111867 |  | 0.2        | 0.011671595 | 0.000271207 | 111867 |  | 0.2         | 0.32247093  | 9.99745E-06 | 111973 |  | 0.2         | 0.157659174 | 4.74713E-05 | 112017 |  |
| 0.3        | 0.199913758 | 3.73856E-05 | 155122 |  | 0.3        | 0.002455303 | 0.000417216 | 155122 |  | 0.3         | 0.298524912 | 1.31582E-05 | 155285 |  | 0.3         | 0.100130183 | 7.72358E-05 | 155342 |  |
| 0.4        | 0.264138286 | 2.09758E-05 | 193375 |  | 0.4        | 0.002525618 | 0.000414524 | 193375 |  | 0.4         | 0.422634081 | 1.79327E-06 | 193582 |  | 0.4         | 0.166775816 | 4.40246E-05 | 193665 |  |
| 0.5        | 0.296942023 | 1.49956E-05 | 227784 |  | 0.5        | 0.003390411 | 0.000386535 | 227784 |  | 0.5         | 0.4262828   | 1.62619E-06 | 228036 |  | 0.5         | 0.187827424 | 3.69537E-05 | 228125 |  |
| XL.VLDL.L  |             |             |        |  | XL.VLDL.P  |             |             |        |  | XL.VLDL.PL  |             |             |        |  | XL.VLDL.TG  |             |             |        |  |
| thresh     | pval        | r2          | nsnps  |  | thresh     | pval        | r2          | nsnps  |  | thresh      | pval        | r2          | nsnps  |  | thresh      | pval        | r2          | nsnps  |  |
| 0.001      | 0.024509004 | 0.000201025 | 1412   |  | 0.001      | 0.158537748 | 5.27925E-05 | 1385   |  | 0.001       | 0.071338206 | 0.000101179 | 1412   |  | 0.001       | 0.059561949 | 0.00011271  | 1412   |  |
| 0.05       | 0.199335435 | 3.69594E-05 | 35046  |  | 0.05       | 0.337508748 | 9.27152E-06 | 34281  |  | 0.05        | 0.292930517 | 1.39781E-05 | 35068  |  | 0.05        | 0.217471667 | 2.82893E-05 | 35071  |  |
| 0.1        | 0.439455945 | 1.20428E-06 | 63017  |  | 0.1        | 0.32934493  | 1.0291E-05  | 61613  |  | 0.1         | 0.386709786 | 3.90305E-06 | 63039  |  | 0.1         | 0.413123402 | 2.23631E-06 | 63066  |  |
| 0.2        | 0.228892432 | 2.86046E-05 | 111985 |  | 0.2        | 0.060536231 | 0.000126753 | 109522 |  | 0.2         | 0.20974336  | 3.0689E-05  | 112018 |  | 0.2         | 0.223005345 | 2.6952E-05  | 112069 |  |
| 0.3        | 0.130236511 | 6.56981E-05 | 155295 |  | 0.3        | 0.031641521 | 0.000181902 | 151928 |  | 0.3         | 0.129817927 | 5.98323E-05 | 155350 |  | 0.3         | 0.107188619 | 7.15408E-05 | 155422 |  |
| 0.4        | 0.129194508 | 6.62754E-05 | 193591 |  | 0.4        | 0.051462088 | 0.000140266 | 189392 |  | 0.4         | 0.157530996 | 4.75261E-05 | 193672 |  | 0.4         | 0.153082014 | 4.8595E-05  | 193773 |  |
| 0.5        | 0.114633634 | 7.49934E-05 | 228025 |  | 0.5        | 0.046584339 | 0.000148657 | 223084 |  | 0.5         | 0.150196337 | 5.04979E-05 | 228129 |  | 0.5         | 0.129270289 | 5.92406E-05 | 228241 |  |
| XXL.VLDL.L |             |             |        |  | XXL.VLDL.P |             |             |        |  | XXL.VLDL.PL |             |             |        |  | XXL.VLDL.TG |             |             |        |  |
| thresh     | pval        | r2          | nsnps  |  | thresh     | pval        | r2          | nsnps  |  | thresh      | pval        | r2          | nsnps  |  | thresh      | pval        | r2          | nsnps  |  |
| 0.001      | 0.052788565 | 0.000138134 | 1411   |  | 0.001      | 0.090761247 | 9.41472E-05 | 1397   |  | 0.001       | 0.050051433 | 0.00012551  | 1412   |  | 0.001       | 0.226468969 | 2.61505E-05 | 1412   |  |
| 0.05       | 0.164162289 | 5.0394E-05  | 35023  |  | 0.05       | 0.035459284 | 0.000172012 | 34810  |  | 0.05        | 0.292301632 | 1.38729E-05 | 35088  |  | 0.05        | 0.361097802 | 5.86807E-06 | 35081  |  |
| 0.1        | 0.40638667  | 2.95874E-06 | 62957  |  | 0.1        | 0.094092035 | 9.13343E-05 | 62592  |  | 0.1         | 0.397818231 | 3.11392E-06 | 63094  |  | 0.1         | 0.092594033 | 8.14957E-05 | 63080  |  |
| 0.2        | 0.43696425  | 1.32786E-06 | 111867 |  | 0.2        | 0.156849974 | 5.35341E-05 | 111254 |  | 0.2         | 0.318352303 | 1.03554E-05 | 112128 |  | 0.2         | 0.052036847 | 0.000122647 | 112102 |  |
| 0.3        | 0.362672906 | 6.5099E-06  | 155122 |  | 0.3        | 0.253293544 | 2.3265E-05  | 154273 |  | 0.3         | 0.257693942 | 1.96411E-05 | 155513 |  | 0.3         | 0.034741501 | 0.000152968 | 155474 |  |
| 0.4        | 0.32307879  | 1.1117E-05  | 193375 |  | 0.4        | 0.263150949 | 2.11773E-05 | 192326 |  | 0.4         | 0.225427969 | 2.63899E-05 | 193882 |  | 0.4         | 0.030601656 | 0.000162683 | 193830 |  |
| 0.5        | 0.329370664 | 1.02877E-05 | 227784 |  | 0.5        | 0.2136261   | 3.32421E-05 | 226559 |  | 0.5         | 0.211271189 | 2.98591E-05 | 228369 |  | 0.5         | 0.037445761 | 0.000147269 | 228304 |  |

## Apolipoproteins

| ApoA1  |             |             |        |  | ApoB   |             |             |        |  |
|--------|-------------|-------------|--------|--|--------|-------------|-------------|--------|--|
| thresh | pval        | r2          | nsnps  |  | thresh | pval        | r2          | nsnps  |  |
| 0.001  | 0.072363307 | 0.000102811 | 1411   |  | 0.001  | 0.073889422 | 0.000101253 | 1412   |  |
| 0.05   | 0.000127215 | 0.000646535 | 35037  |  | 0.05   | 0.110136159 | 7.26216E-05 | 35069  |  |
| 0.1    | 0.002583171 | 0.000377957 | 62992  |  | 0.1    | 0.021687326 | 0.000197213 | 63057  |  |
| 0.2    | 0.000838138 | 0.000477192 | 111963 |  | 0.2    | 0.0054798   | 0.000312752 | 112075 |  |
| 0.3    | 0.007394071 | 0.00028717  | 155257 |  | 0.3    | 0.005543492 | 0.00031176  | 155425 |  |
| 0.4    | 0.008609489 | 0.000274237 | 193517 |  | 0.4    | 0.003496152 | 0.000351555 | 193756 |  |
| 0.5    | 0.012372649 | 0.00024368  | 227941 |  | 0.5    | 0.002953447 | 0.00036622  | 228225 |  |

**Bile acid metabolism - Shin et al., 2014**

| cholate |             |             |        | deoxycholate |             |             |        | glycochenodeoxycholate |             |             |        | glycocholate |             |             |        |
|---------|-------------|-------------|--------|--------------|-------------|-------------|--------|------------------------|-------------|-------------|--------|--------------|-------------|-------------|--------|
| thresh  | pval        | r2          | nsnps  | thresh       | pval        | r2          | nsnps  | thresh                 | pval        | r2          | nsnps  | thresh       | pval        | r2          | nsnps  |
| 0.001   | 0.270019049 | 6.71E-05    | 867    | 0.001        | 0.139565761 | 0.000237368 | 869    | 0.001                  | 0.027474198 | 0.000550716 | 868    | 0.001        | 0.006413512 | 0.001100534 | 869    |
| 0.05    | 0.189436222 | 0.000138293 | 20361  | 0.05         | 0.46904007  | 1.22E-06    | 20358  | 0.05                   | 0.485057165 | 2.10E-07    | 20370  | 0.05         | 0.328844107 | 3.49E-05    | 20363  |
| 0.1     | 0.398608774 | 1.18E-05    | 36487  | 0.1          | 0.419289853 | 8.41E-06    | 36480  | 0.1                    | 0.422938589 | 5.65E-06    | 36491  | 0.1          | 0.38837596  | 1.43E-05    | 36485  |
| 0.2     | 0.250018542 | 8.12E-05    | 64857  | 0.2          | 0.455127005 | 2.58E-06    | 64862  | 0.2                    | 0.359828124 | 1.93E-05    | 64872  | 0.2          | 0.45650703  | 2.12E-06    | 64863  |
| 0.3     | 0.276473427 | 6.29E-05    | 89576  | 0.3          | 0.16151186  | 0.000197926 | 89573  | 0.3                    | 0.455711528 | 1.85E-06    | 89568  | 0.3          | 0.43341901  | 5.00E-06    | 89569  |
| 0.4     | 0.198245953 | 0.000128397 | 111574 | 0.4          | 0.097335776 | 0.000340822 | 111569 | 0.4                    | 0.460167223 | 1.50E-06    | 111591 | 0.4          | 0.390294109 | 1.38E-05    | 111567 |
| 0.5     | 0.087691659 | 0.000327918 | 131188 | 0.5          | 0.078177683 | 0.000407117 | 131178 | 0.5                    | 0.278280216 | 5.17E-05    | 131217 | 0.5          | 0.468390575 | 1.12E-06    | 131186 |

  

| glycodeoxycholate |             |             |        | hyodeoxycholate |             |             |        | taurochenodeoxycholate |             |             |        | taurocholate |             |             |        |
|-------------------|-------------|-------------|--------|-----------------|-------------|-------------|--------|------------------------|-------------|-------------|--------|--------------|-------------|-------------|--------|
| thresh            | pval        | r2          | nsnps  | thresh          | pval        | r2          | nsnps  | thresh                 | pval        | r2          | nsnps  | thresh       | pval        | r2          | nsnps  |
| 0.001             | 0.194049854 | 0.000511117 | 871    | 0.001           | 0.276971606 | 6.17E-05    | 868    | 0.001                  | 0.455643959 | 2.31E-06    | 869    | 0.001        | 0.361598889 | 3.32E-05    | 866    |
| 0.05              | 0.031281136 | 0.002377487 | 20367  | 0.05            | 0.063056438 | 0.000412344 | 20371  | 0.05                   | 0.179106713 | 0.000157009 | 20368  | 0.05         | 0.312641107 | 6.30E-05    | 20352  |
| 0.1               | 0.006376257 | 0.004248412 | 36482  | 0.1             | 0.008635283 | 0.000998737 | 36499  | 0.1                    | 0.255296032 | 8.05E-05    | 36492  | 0.1          | 0.177105292 | 0.000226862 | 36472  |
| 0.2               | 0.006335734 | 0.004256125 | 64852  | 0.2             | 0.00953754  | 0.000967564 | 64871  | 0.2                    | 0.12004032  | 0.000256686 | 64873  | 0.2          | 0.035163323 | 0.000865441 | 64860  |
| 0.3               | 0.006672574 | 0.004193496 | 89550  | 0.3             | 0.005165641 | 0.001158655 | 89583  | 0.3                    | 0.058817442 | 0.000455352 | 89565  | 0.3          | 0.028866304 | 0.00095153  | 89558  |
| 0.4               | 0.003381652 | 0.005021514 | 111545 | 0.4             | 0.001237735 | 0.001613123 | 111586 | 0.4                    | 0.073154621 | 0.000392467 | 111592 | 0.4          | 0.016857575 | 0.001191225 | 111593 |
| 0.5               | 0.001922054 | 0.005718674 | 131157 | 0.5             | 0.001254704 | 0.001608738 | 131199 | 0.5                    | 0.165619812 | 0.000175588 | 131221 | 0.5          | 0.036093093 | 0.000854141 | 131221 |

  

| taurodeoxycholate |             |             |        | tauroolithocholate 3-sulfate |             |             |        | ursodeoxycholate |             |          |        |
|-------------------|-------------|-------------|--------|------------------------------|-------------|-------------|--------|------------------|-------------|----------|--------|
| thresh            | pval        | r2          | nsnps  | thresh                       | pval        | r2          | nsnps  | thresh           | pval        | r2       | nsnps  |
| 0.001             | 0.32377736  | 0.000135439 | 867    | 0.001                        | 0.018994862 | 0.000661044 | 868    | 0.001            | 0.283629511 | 6.34E-05 | 868    |
| 0.05              | 0.306720845 | 0.000165374 | 20365  | 0.05                         | 0.079284086 | 0.000305256 | 20365  | 0.05             | 0.348586042 | 2.93E-05 | 20361  |
| 0.1               | 0.122871495 | 0.000872817 | 36495  | 0.1                          | 0.062831491 | 0.000360138 | 36487  | 0.1              | 0.313946687 | 4.55E-05 | 36491  |
| 0.2               | 0.189110212 | 0.0005031   | 64863  | 0.2                          | 0.005315796 | 0.001001783 | 64862  | 0.2              | 0.302874707 | 5.16E-05 | 64860  |
| 0.3               | 0.22711196  | 0.000362922 | 89558  | 0.3                          | 0.008924248 | 0.000861395 | 89555  | 0.3              | 0.37253987  | 2.05E-05 | 89539  |
| 0.4               | 0.122435664 | 0.000876045 | 111585 | 0.4                          | 0.009176354 | 0.000853907 | 111591 | 0.4              | 0.425405373 | 6.85E-06 | 111554 |
| 0.5               | 0.11997301  | 0.000894552 | 131203 | 0.5                          | 0.00556821  | 0.000989131 | 131213 | 0.5              | 0.350200218 | 2.87E-05 | 131167 |

**Other - Kettunen et al., 2016 & Shin et al., 2014**

| Alb (Albumin) |             |             |        | GloI (glycerol) |             |             |        | TotPG (total phosphoglycerides) |             |             |        | BHBA (Ketone bodies) |             |             |        |
|---------------|-------------|-------------|--------|-----------------|-------------|-------------|--------|---------------------------------|-------------|-------------|--------|----------------------|-------------|-------------|--------|
| thresh        | pval        | r2          | nsnps  | thresh          | pval        | r2          | nsnps  | thresh                          | pval        | r2          | nsnps  | thresh               | pval        | r2          | nsnps  |
| 0.001         | 0.143454972 | 5.98118E-05 | 1411   | 0.001           | 0.10447976  | 7.80113E-05 | 1412   | 0.001                           | 0.274423856 | 2.65834E-05 | 1410   | 0.001                | 0.177291564 | 0.000116258 | 868    |
| 0.05          | 0.359996359 | 6.77739E-06 | 35021  | 0.05            | 0.347070659 | 7.64211E-06 | 34956  | 0.05                            | 0.011235683 | 0.000385229 | 34882  | 0.05                 | 0.05452605  | 0.000348319 | 20369  |
| 0.1           | 0.27392768  | 1.9049E-05  | 62951  | 0.1             | 0.477150689 | 1.62292E-07 | 62873  | 0.1                             | 0.016801795 | 0.000333901 | 62721  | 0.1                  | 0.076693928 | 0.000276482 | 36491  |
| 0.2           | 0.269554949 | 1.98939E-05 | 111861 | 0.2             | 0.291038852 | 1.49684E-05 | 111731 | 0.2                             | 0.008918162 | 0.000415045 | 111438 | 0.2                  | 0.070632294 | 0.000293557 | 64866  |
| 0.3           | 0.310570417 | 1.28832E-05 | 155111 | 0.3             | 0.257584472 | 2.09315E-05 | 154885 | 0.3                             | 0.030079688 | 0.000261301 | 154460 | 0.3                  | 0.046115741 | 0.00038454  | 89563  |
| 0.4           | 0.210921359 | 3.40277E-05 | 193360 | 0.4             | 0.355735966 | 6.76109E-06 | 193073 | 0.4                             | 0.033900182 | 0.000246695 | 192528 | 0.4                  | 0.076851492 | 0.000276059 | 111587 |
| 0.5           | 0.141782476 | 6.06482E-05 | 227766 | 0.5             | 0.338689685 | 8.554E-06   | 227410 | 0.5                             | 0.064711747 | 0.000170073 | 226766 | 0.5                  | 0.060191964 | 0.000327218 | 131215 |

## References

1. Sud, M. *et al.* LMSD: LIPID MAPS structure database. *Nucleic Acids Res.* **35**, D527-32 (2007).
